# Supplementary material for: Transcription factor-mediated intestinal metaplasia and the role of a shadow enhancer
Source: PubMed Central journal article supplement — Genes Dev. 2022 Jan 1;36(1-2):38–52. doi: 10.1101/gad.348983.121 (PMC8763054; doi:10.1101/gad.348983.121), 2022-01-01
Supplement: supp_gad.348983.121_Supplemental_Material_.pdf [file supp_gad.348983.121_Supplemental_Material_.pdf]

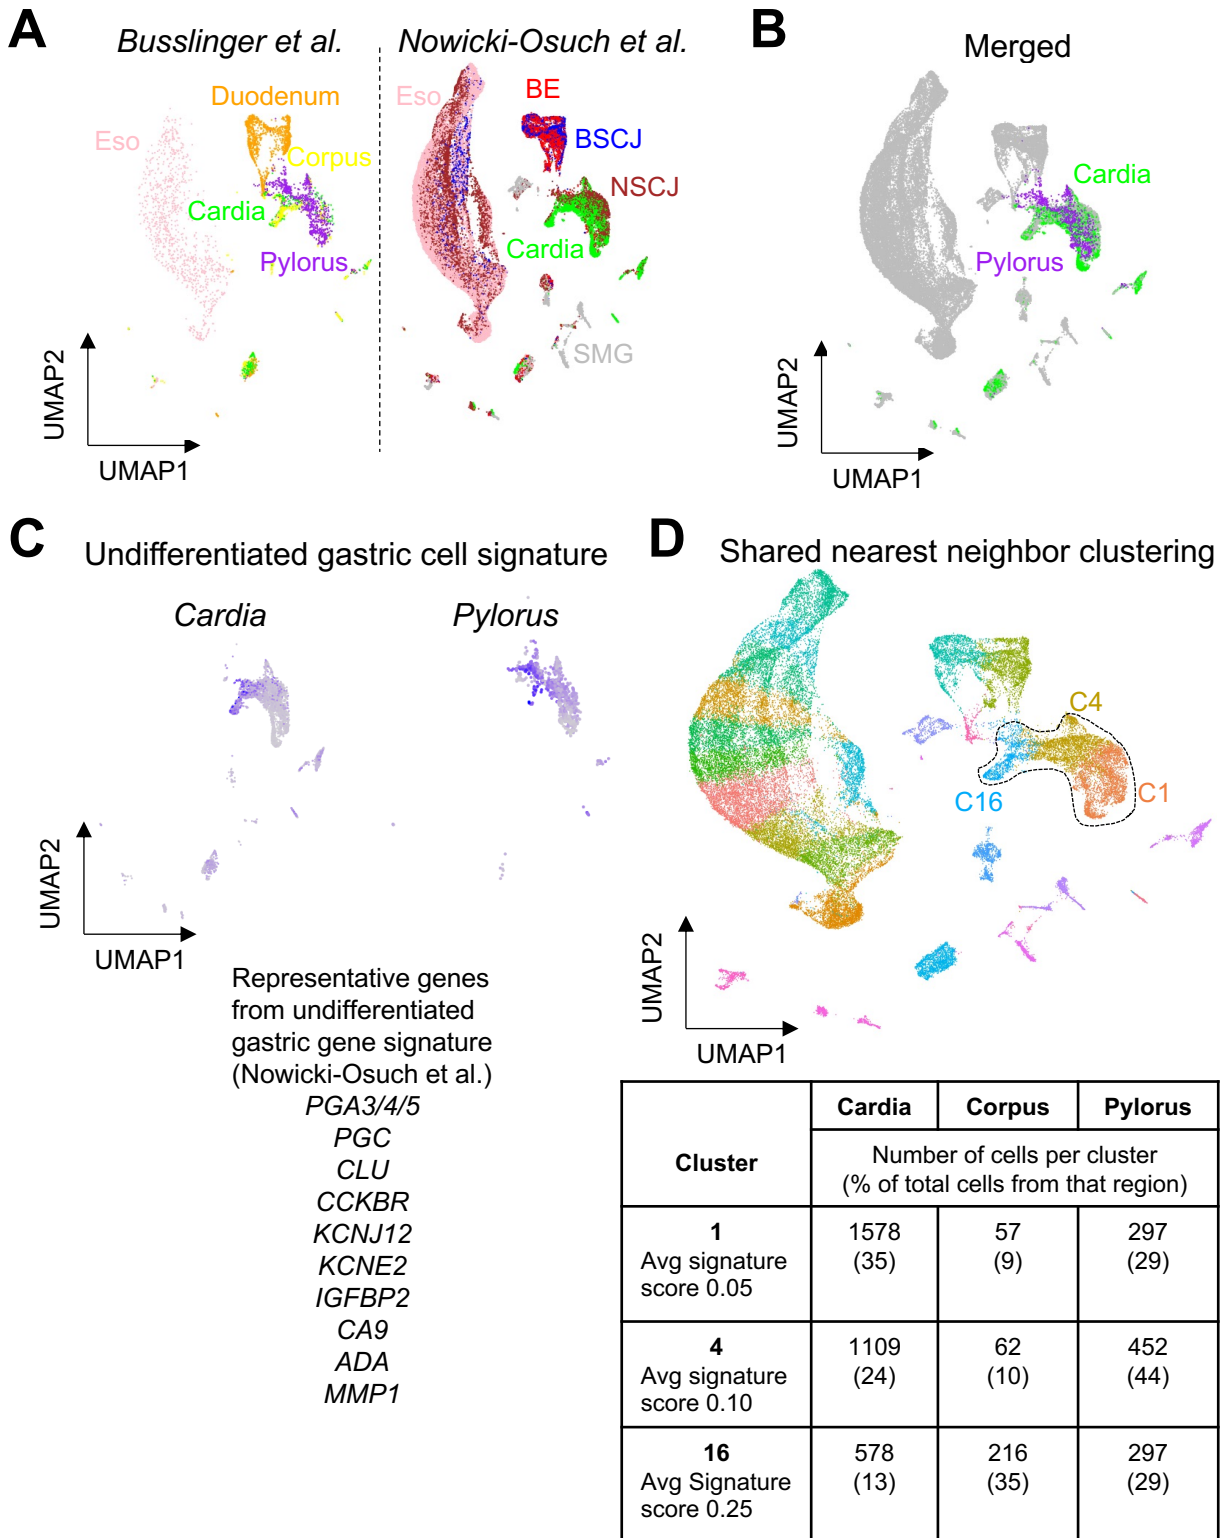

**FIGURE S1. Human stomach cardia and pylorus display similar transcriptional profiles**

(A) Single cell RNA-seq data from different regions of the human gastrointestinal tract from two independent studies (Busslinger et al. 2021b; Nowicki-Osuch et al. 2021) were integrated and projected adjacent to each other using uniform manifold approximation (UMAP). Eso:

Esophagus, BE: Barrett's esophagus, NSCJ: Normal squamo-columnar junction, BSCJ: Squamo-columnar junction from patients with BE, SMG: Esophageal submucosal glands.

(B) Datasets from above two studies when projected together reveal overlapping transcriptional profiles of the majority of epithelial cells from human stomach cardia and pylorus/antrum.

(C) Undifferentiated gastric cell signature, derived by Nowicki-Osuch et al. and salient genes depicted below, reveals co-aggregation of stem cell like populations in human stomach cardia and pylorus.

(D) Clustering of all cells from the two datasets identifies Clusters 1, 4 and 16 to be enriched for stomach cardia and pylorus cells. Cluster 16 is enriched in cells with an undifferentiated "stem-cell" like phenotype and has contributions from both stomach cardia and pylorus.

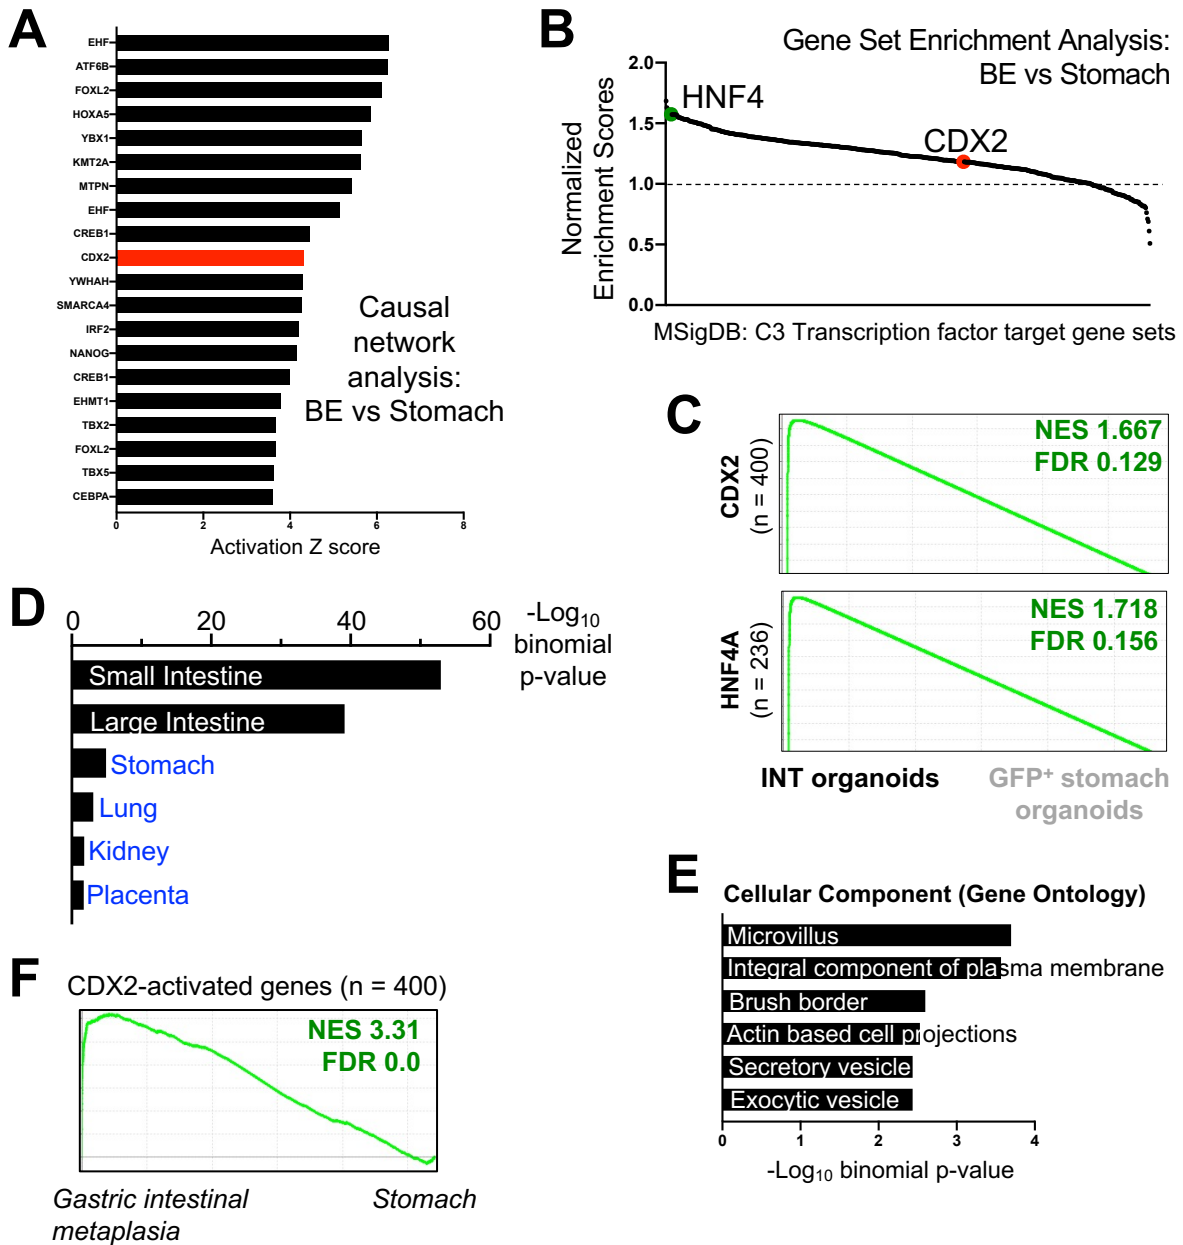

**FIGURE S2. CDX2 and HNF4A induce intestinal enhancers and genes in mouse stomach organoids.**

(A) Causal network analysis (Ingenuity pathways) using bulk RNA seq data from BE vs. normal stomach mucosa (Owen et al. 2018) implicates CDX2 in BE pathogenesis.

(B) Gene Set Enrichment Analysis (GSEA) of the same bulk RNA seq data (Owen et al. 2018) using curated gene sets (MSigDB C3 Transcription factor targets). HNF4 and CDX2 target genes are upregulated in BE compared to normal stomach mucosa.

(C) GSEA of genes induced by CDX2 (n = 400) or HNF4A (n = 218) in gastric organoid lines, compared to GFP controls (DESeq2,  $q < 0.05$ ,  $\log_2$  fold-increase  $> 1$ ). Both sets are enriched for transcripts expressed in intestinal organoids. NES, normalized enrichment score; FDR, false discovery rate.

(D-E) Enrichment analysis (enrichR) of CDX2-induced genes reveals a predominant intestinal program (D), and enrichment of CDX2-dependent intestinal features (Gao and Kaestner 2010) such as brush border, microvillus, and actin-based cell projections.

(F) GSEA of 400 genes induced in CDX2<sup>+</sup> gastric organoids (DESeq2,  $\log_2$  fold-increase  $> 1$ ,  $q < 0.05$ ), showing resemblance to clinical specimens of human GIM (Companiononi et al. 2017).

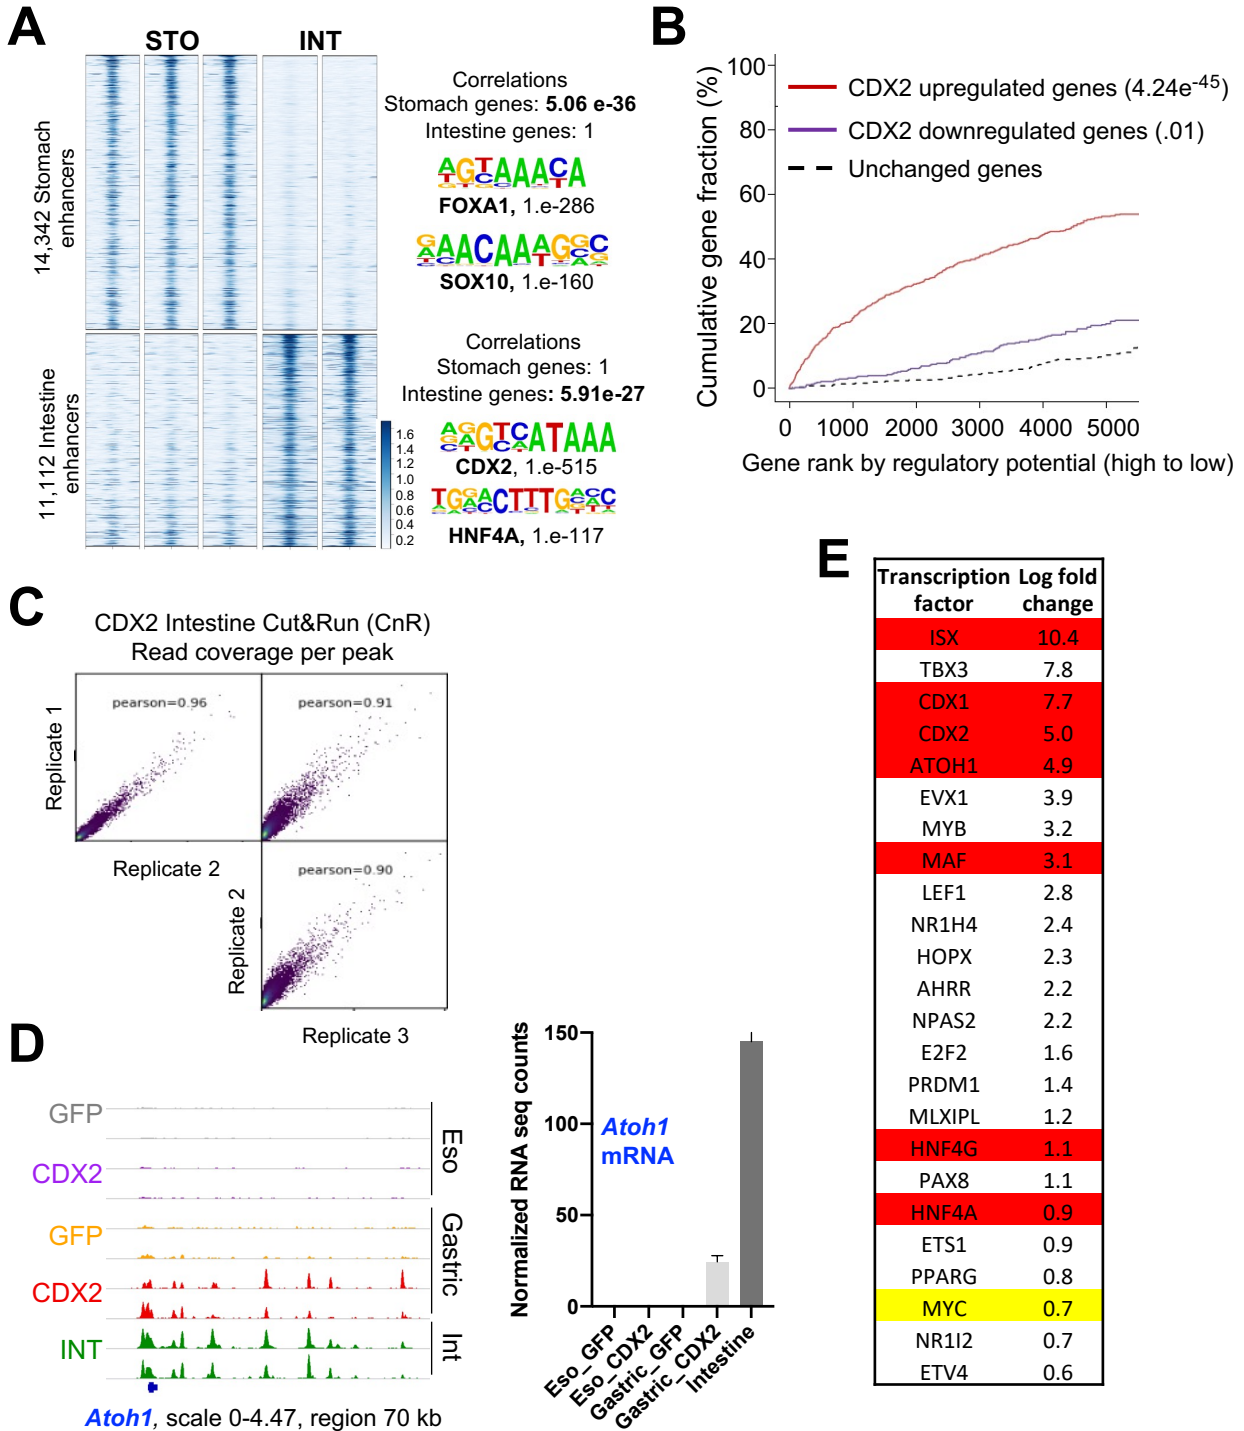

**FIGURE S3. CDX2 upregulates canonical intestinal transcripts and transcription factors in mouse stomach organoids**

(A) Enhancers with differential chromatin accessibility in stomach (left) and intestinal (right) organoids (DESeq2,  $\log_2$  fold-difference  $>1$ ,  $q < 0.05$ ). Tissue-specific enhancers correlate with gene expression profiles (BETA analysis) and are enriched for specific TF-binding motifs.

(B) Genes induced by CDX2 correlate with loci showing significantly higher ATAC-seq signal ( $<100$  kb from TSSs), i.e., genes with high regulatory potential defined by BETA analysis (Wang et al. 2013). In contrast, elevated ATAC signals correlate poorly with reduced expression of nearby genes.

(C) High correlation between signals at called peaks in 3 biological replicates for CDX2 CUT&RUN (CnR) on adult mouse intestinal villus cells.

(D) IGV data tracks of open chromatin at the intestine-restricted *Atoh1* locus in replicate samples. Forced CDX2 expression in stomach but not in esophageal organoids increased accessibility at intestinal enhancers. Altered stomach cell chromatin was accompanied by induced *Atoh1* expression (RNA-seq counts, mean  $\pm$ SD).

(E) Gene expression changes in CDX2<sup>+</sup> gastric organoids reveal upregulation of intestine-restricted TF genes (red) and *Myc* (yellow), which was recently implicated in BE pathogenesis (Nowicki-Osuch et al. 2021).

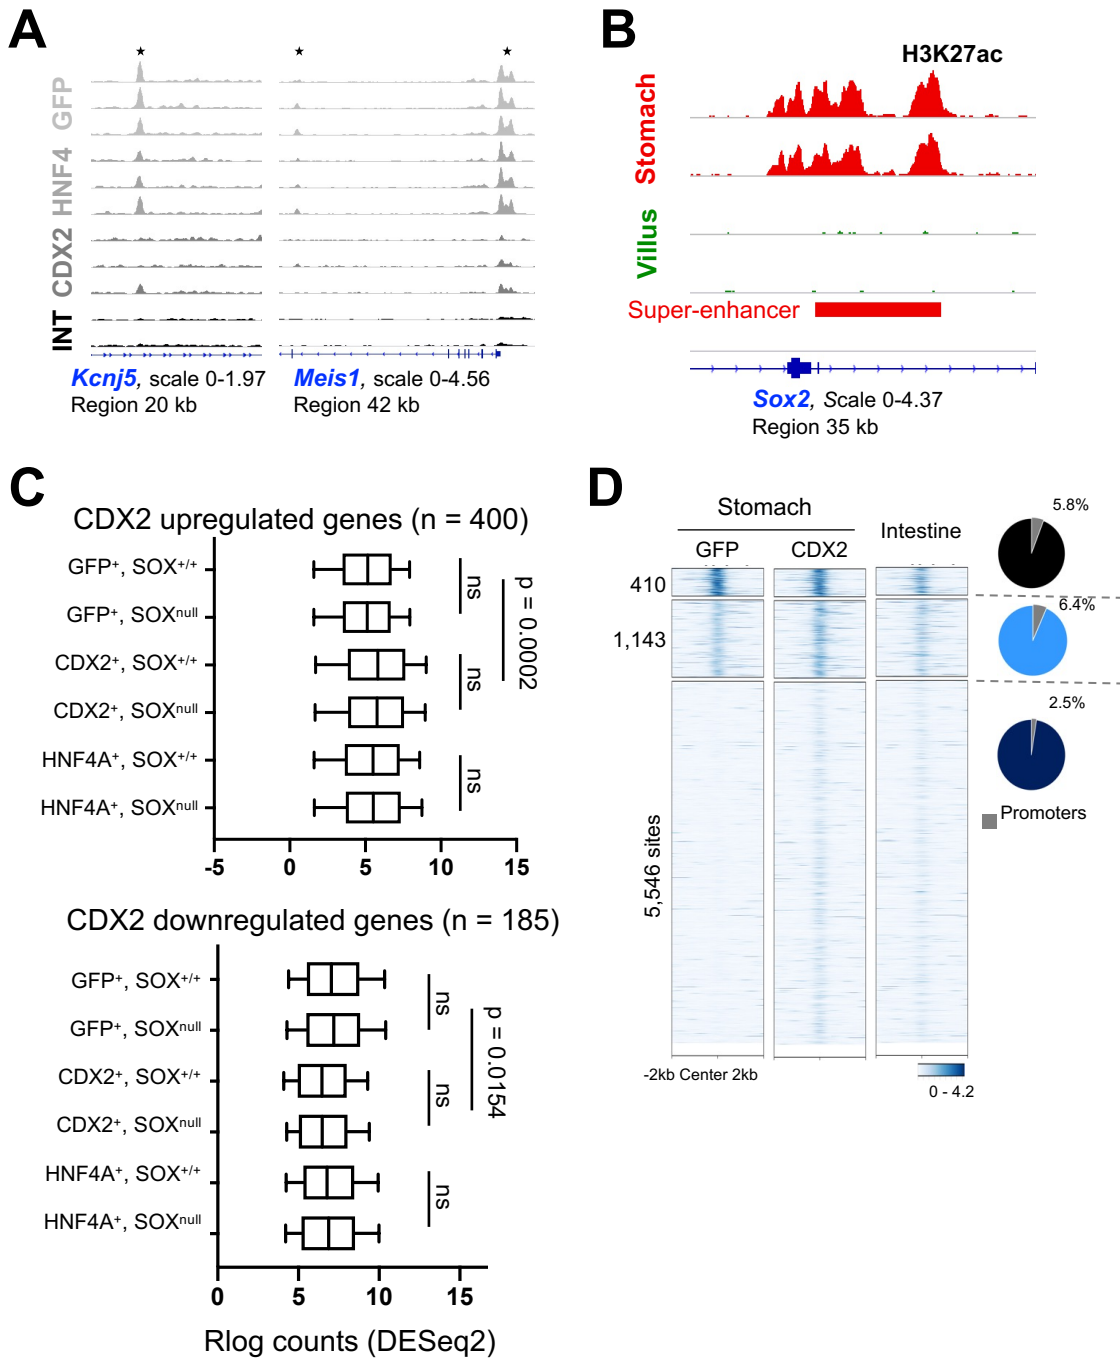

**FIGURE S4. SOX2 knockout does not impact CDX2 mediated changes in stomach organoids**

(A) ATAC-seq data tracks from classic stomach-restricted loci that show decreased chromatin access in CDX2<sup>+</sup> organoids. Accessibility was reduced to lesser degrees in HNF4A<sup>+</sup> organoids.

(B) H3K27Ac ChIP-seq data from mouse stomach mucosa and intestinal villi, showing a stomach-restricted super-enhancer over the *Sox2* locus.

(C) Left, SOX2 depletion has no statistically significant impact (Kolmogorov-Smirnov test) on expression of HNF4A- or CDX2-responsive genes. Rlog counts of 400 genes upregulated (top) and 185 genes downregulated (bottom) upon CDX2 expression in gastric organoids.

(D) Classes of chromatin access (*k*-means clustering of ATAC-seq data) at 7,099 *cis*-elements unique to gastric organoids (cluster 3 in Fig. 2C). CDX2 binding at 5,546 previously closed sites is associated with small increases in chromatin accessibility, similar to basal levels in intestinal (INT) organoids. To allow cross-comparison, the heatmap scale is identical to Fig. 4B.



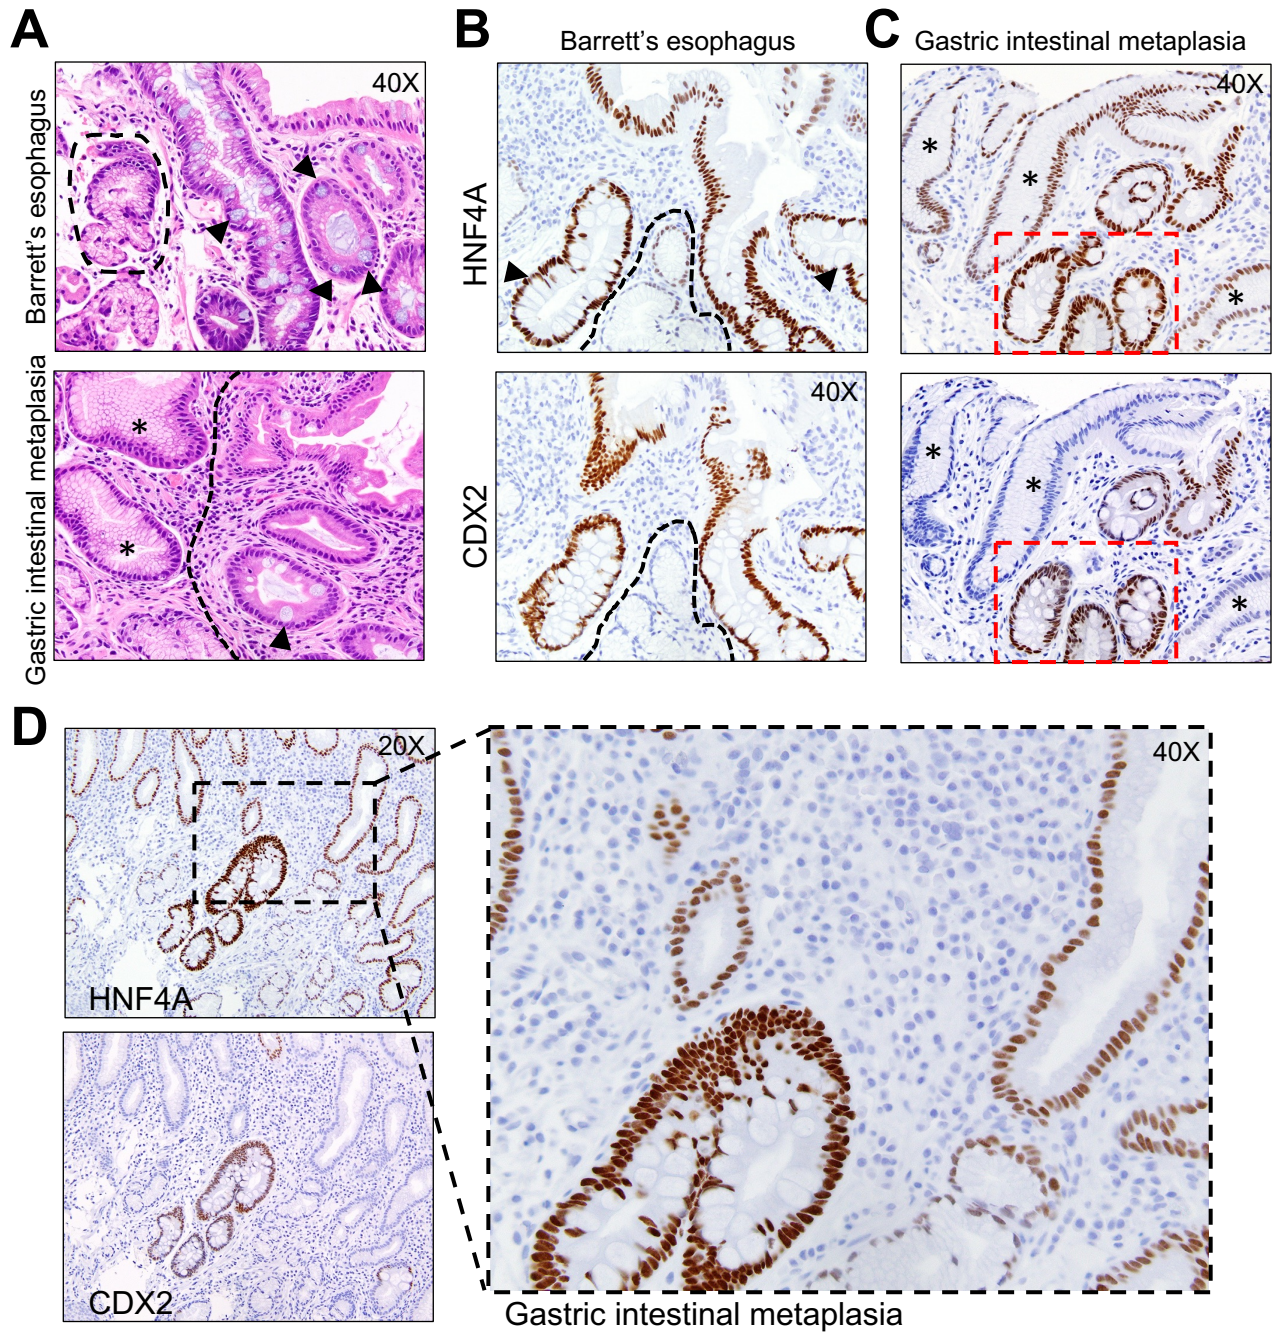

**FIGURE S5. CDX2 expression in human IM is restricted to HNF4A-overexpressing stomach cells**

(A) hematoxylin and eosin (H&E) sections from BE (top) and GIM (bottom) corresponding to serial tissue sections in Fig. 5C-D, showing typical IM morphology. HNF4A<sup>low</sup>CDX2<sup>neg</sup> regions seen on IHC correspond to gastric foveolar glands (top, dashed circle; bottom, asterisks) whereas HNF4A<sup>high</sup>CDX2<sup>+</sup> glands show intestinal features, including goblet cells (arrowheads). (B-D) Additional examples of BE (B) and GIM (C-D), illustrating low basal HNF4A expression in CDX2-negative areas and the concordance of HNF4A<sup>high</sup> and CDX2<sup>+</sup> cells (e.g., red dashed box in C). Original magnifications are indicated and HNF4A<sup>low</sup> CDX2<sup>neg</sup> regions are marked with a dashed black perimeter (B) or asterisks (C). Panel D shows a GIM example with a CDX2<sup>+</sup> HNF4A<sup>high</sup> gland cluster carrying goblet cells enveloped by normal HNF4A<sup>low</sup> CDX2<sup>neg</sup> glands. The dashed box is magnified on the right.

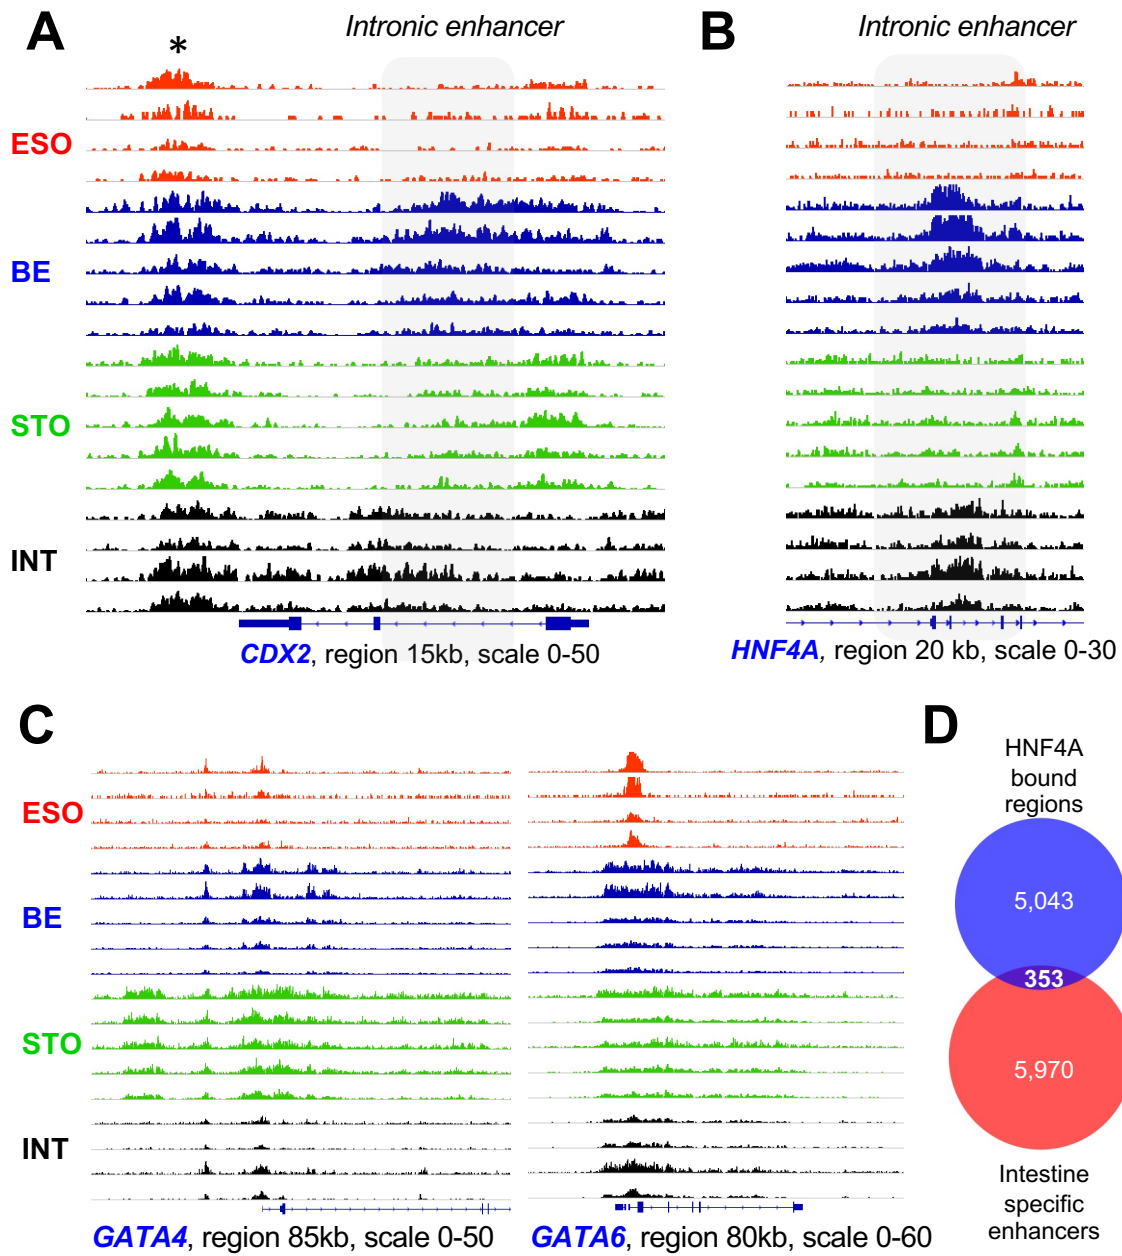

**FIGURE S6. Enhancer activity (H3K4me2 FIT-Seq, data from (Singh et al. 2021)) at pertinent TF gene loci in normal and metaplastic human mucosae.**

(A-B) IGV tracks from H3K4me2 FIT-Seq at the *CDX2* and *HNF4A* loci, showing increased marking in primary human BE specimens compared to the native stomach (STO) epithelium. ESO, Esophagus; INT, Intestine.

(C) In contrast, other intestinal TF loci, such as *GATA4* and *GATA6* show no clear difference in enhancer profiles in BE compared to normal stomach.

(D) HNF4A-occupied sites in HNF4A<sup>+</sup> stomach organoids overlap minimally with intestine-specific enhancers.

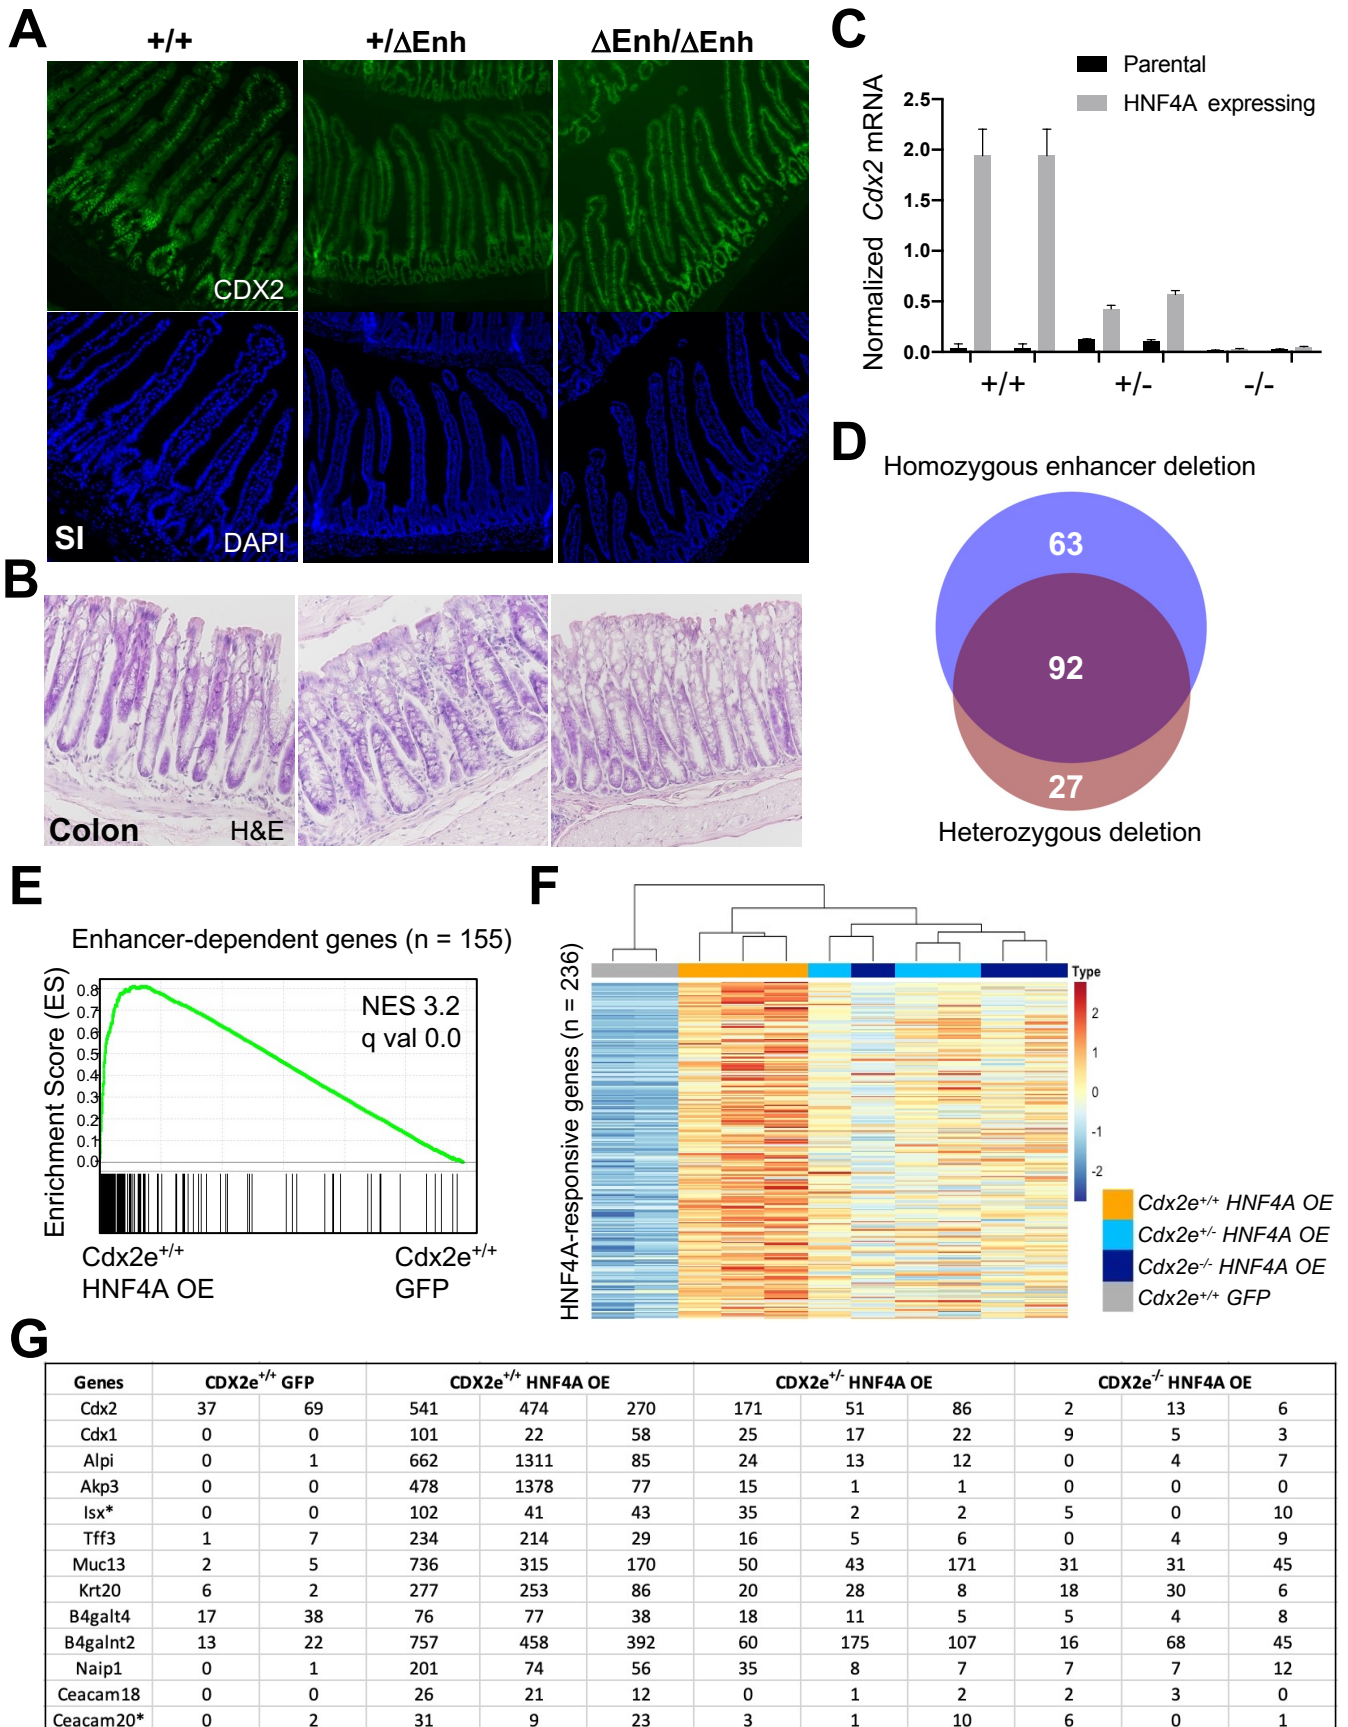

**FIGURE S7. Deletion of a 3' *Cdx2* shadow enhancer attenuates the transcriptional response to HNF4A overexpression in stomach organoids**

(A) Duodenal CDX2 is preserved at wild-type levels in heterozygote and homozygote enhancer-deleted ( $\Delta$ enh) mice, shown here by representative immunofluorescence images from groups of 3 independent animals of each genotype.

(B) Colonic architecture is preserved in heterozygote and homozygote enhancer deleted mice, shown here by representative H&E from group of 3 independent animals of each genotype.

(C) qRT-PCR confirmation that HNF4A overexpression in gastric organoids fails to induce *Cdx2* mRNA in homozygous  $\Delta$ enh mice. Mono-allelic enhancer loss blunted *Cdx2* induction.

(D) Statistically reduced expression of 155 and 119 genes, respectively, in HNF4A<sup>+</sup>  $\Delta$ enh/ $\Delta$ enh and +/ $\Delta$ enh organoids, compared to wild-type HNF4A<sup>+</sup> organoids. The two groups overlap significantly (92 genes, representative factor 73.2,  $p < 5.8e-171$ ).

(E) Genes that escape upregulation in enhancer-deleted compared to wild type HNF4A<sup>+</sup> stomach organoids (DESeq2, Log<sub>2</sub> fold-change >1,  $q < 0.05$ ;  $n = 155$ ) are enriched in HNF4A<sup>+</sup> gastric organoids compared to control gastric organoids as shown by GSEA and hence are enhancer responsive genes. This illustrates that this enhancer and in turn endogenous CDX2 activation is important in mediating intestinalization mediated by HNF4A.

(F) Heatmap of 236 genes significantly upregulated by HNF4A overexpression in wild type enhancer organoids (DESeq2, log<sub>2</sub> fold-change >1,  $q < 0.05$ ). Transcriptional response to HNF4A overexpression is broadly attenuated in  $\Delta$ enh/ $\Delta$ enh and +/ $\Delta$ enh stomach organoids.

(G) Normalized RNA-seq counts for classic intestinal genes in wild type gastric and HNF4A<sup>+</sup> organoids from wild-type, +/ $\Delta$ enh or  $\Delta$ enh/ $\Delta$ enh mice. Several genes show near-complete abrogation in enhancer deleted organoids.

## SUPPLEMENTAL METHODS

*Passaging of Gastric organoids.* Gastric organoids grew as spheres requiring passage every 4-6 days, when Matrigel containing mature organoids was dissociated in 0.05% Trypsin at 37°C for 1-3 min with intermittent manual trituration. Dissociation was verified by microscopy and the reaction was quenched with fetal bovine serum (FBS) when small grape-like cell clusters replaced most spheroids. Cells were pelleted and re-plated in Matrigel by 1:3 to 1:5 dilution, depending on starting density and the degree of cell dissociation. *Sox2<sup>fl/fl</sup>* mice were reported previously (Sarkar et al. 2016) and antral organoids were generated as described above. *Sox2* was excised in vitro using adenoviral CRE delivery at two consecutive passages and confirmed by immunoblotting.

*Generation and passaging of esophageal organoids.* We incubated fragments of esophageal epithelium in 1 mL 0.25% trypsin-EDTA at 37°C for 10 min, vortexed gently, rinsed the tissue with 8 ml Soybean Trypsin Inhibitor (Sigma Aldrich, T6522), and repeated the digestion and wash cycle once. We filtered the dissociated tissue through a 40 µm strainer and washed the strainer with 9 mL washing medium (100 units/mL penicillin, 0.1 mg/mL streptomycin, 2 mM L-glutamine, and 10% FBS in DMEM/F12 medium (Invitrogen, 11320033) containing HEPES). We centrifuged cells at 200 *g* for 5 min before resuspending the cells in Matrigel (Corning, 356234) and applying organoid medium (advanced DMEM/F12 supplemented with Glutamax, 0.15 mM HEPES, N2 and B27 supplements, 1 mM N-acetylcysteine, 50 ng/ml human EGF, and 3% conditioned medium from L-WRN cells expressing Wnt3a, Noggin, and Rspo1) (Miyoshi and Stappenbeck 2013). For subsequent passages, organoids were dissociated in 0.25% trypsin at 37°C for 10 min and small cell aggregates were embedded in fresh Matrigel.

*Isolation of gastric antral and small intestinal Lgr5<sup>+</sup> stem cells.* Gastric antral glands were isolated as above from *Lgr5<sup>GFP-Cre</sup>* mice (Jackson Labs 008875) and dissociated to single cells in a mixture of 2.5 mL Accumax (Innovative Cell Technologies, AM105), 2.5 mL Dispase (Stem Cell Technologies, 07913), and 0.5 mL 10x TrypLE (ThermoFisher, A1217701) in 4.5 mL phenol red-free Dulbecco's Modified Eagle Medium (DMEM) for 10 min at 37°C. Stem cells from the proximal 1/3 small intestine were isolated as described previously. After gently scraping off villi, the remaining intestine was rinsed, minced into small pieces, and rotated in 5 mM EDTA solution in PBS at 4°C for 45 min. Samples were shaken manually every 10 min and the solution was changed at 30 min. Released crypts were passed through a 70 µm filter and the

eluate was pelleted and digested in 4x TrypLE (ThermoFisher, A1217701) for 30 min at 37°C. Antral or intestinal cells were resuspended in FACS buffer (phenol red-free DMEM, 2% FBS and ROCK inhibitor), labeled with DAPI (BD Biosciences 564907, 1:1000), and sorted by flow cytometry to isolate GFP<sup>+</sup> (Lgr5<sup>+</sup>) stem cells.

*Immunoblotting.* Protein was isolated from organoid pellets using RIPA buffer (Sigma, R0278), quantified using the Pierce BCA Protein Assay Kit (Thermo, 23227), and 40 µg was loaded per sample onto SDS-PAGE gels. After electrophoresis, membrane transfer was achieved using the IBlot 2 system (Thermo IB21001). Membranes were blocked with 5% bovine serum albumin (BSA) in Tris-buffered saline (pH 8 + 0.1% Tween-20) for 1 h at room temperature, then stained with primary antibodies (Ab, CDX2 – Cell Signaling Technology, D11D10, 1:1000; HNF4A – Novus Biologicals, NBP1-89679, 1:250; SOX2 – R&D Systems, AF3538, 1:2000) overnight at 4°C. Secondary Ab (horseradish peroxidase (HRP)-conjugated goat anti-rabbit IgG, Invitrogen 656120, 1:2000; or HRP-conjugated mouse anti-goat IgG, Invitrogen 626520, 1:2000) were incubated for 1 h at room temperature and proteins were visualized using ECL Prime reagents (Amersham, RPN2232). For β-Actin we used a HRP-conjugated primary Ab (Abcam, ab49900, 1:25,000) for 1 h. Images were obtained using the GE ImageQuant LAS 4000.

*ChIP-seq.* CHIP-seq was performed on cross-linked chromatin as described previously (Jadhav et al. 2016; Saxena et al. 2017). Briefly, intact gastric antral glands or duodenal villi were cross-linked at room temperature using 1% formaldehyde for 15 min. Cross-linked tissue was resuspended in cold RIPA lysis buffer, sonicated to obtain DNA fragments between 200 and 800 bp, and incubated overnight with H3K27ac Ab (Active Motif, 39135) at 4°C. The solution was subsequently incubated with Protein A and Protein G beads (ThermoFisher, 10002D and 10004D) at 1:1 ratio for 4h at 4°C and beads were then washed twice in sonication buffer, once in high-salt buffer (20 mM Tris-HCl pH 8, 1 mM EDTA, 0.5 M NaCl, 0.1% SDS, 1% Triton X-100), once in LiCl buffer (10 mM Tris-HCl pH 8, 1 mM EDTA, 250 mM LiCl, 1% NP-40), and once in TE buffer. Formaldehyde cross-links were reversed by heating the eluate overnight at 65°C in the presence of 1% SDS and 0.1 M NaHCO<sub>3</sub>. Samples were eluted after treatment with proteinase K for 1 h at 55°C using the QIAQuick PCR purification kits. Libraries were prepared using ThruPLEX DNA-seq kits (Rubicon Genomics, R400427) and sequenced on a NextSeq instrument (Illumina).



## Computational analyses

*ATAC-Seq.* Data were analyzed (Tables S2 and S4) according to ENCODE guidelines (<https://www.encodeproject.org/pipelines/ENCPL792NWO/>). Briefly, DNA sequence tags were aligned to the mouse genome using Bowtie (Langmead et al. 2009) and peaks were called using MACS2 (Zhang et al. 2008) (<https://github.com/taoliu/MACS>). Bigwig tracks were generated using bamCoverage from DeepTools and quantile normalized using Haystack (Pinello et al. 2018) for individual track visualization, *k*-means clustering, and plotting heatmaps with Deeptools (Ramirez et al. 2014). Bigwig tracks were visualized using integrative genomics viewer (IGV) (Robinson et al. 2011). Raw read counts on merged peaks were obtained using Bamliquidator (<https://github.com/BradnerLab/pipeline/wiki/bamliquidator>) and used as input for DESeq2 (Love et al. 2014) to identify differential peaks using the Wald test. Motif analysis was performed using HOMER using findMotifsGenome.pl (Heinz et al. 2010). ATAC-seq peaks were associated with mRNA changes using BETA (Wang et al. 2013). Promoters were defined as peaks between 2 kb upstream and 1 kb downstream from a TSS and the remaining peaks were considered enhancers.

To assess motif enrichment at ATAC-seq sites which display corroborative evidence of TF binding such as increased motif footprint depth (FPD) and/or chromatin accessibility flanking motifs (FA), we used Bagfoot (Baek et al. 2017). Briefly, paired-ended ATAC-seq data from CDX2<sup>+</sup> and control gastric organoids were used as input, adjusted for cut-count bias. Footprint depth (FPD) and flanking accessibility (FA, measured  $\pm 200$ bp from motif centers) were calculated for each motif for the two conditions. The difference between FPD and FA for each motif was calculated between the two conditions and plotted as an XY bag plot, where the “bag” (dark blue) contains ~50% of data points and the surrounding “fence” (light blue) contains 97-100% of data points. Points falling outside the fence represent outliers with significant change between the two conditions.

*RNA microarray analysis.* Published RNA microarray data from gastric intestinal metaplasia (Companiononi et al. 2017) were processed using the Applied Biosystems<sup>TM</sup> Transcriptome Analysis Console under default settings. The differential table was exported and used in a Pre-ranked Gene Set Enrichment Analysis (GSEA) against various gene sets (Fig. S2F).

*RNA-Seq.* Data were analyzed using the VIPER pipeline (Cornwell et al. 2018) and differential gene expression was determined by DESeq2 (Love et al. 2014) using the Wald test. Enrichment

for gene sets was performed by GSEA (Subramanian et al. 2005) (<http://software.broadinstitute.org/gsea/index.jsp>). Mouse genes were compared with human BE (Fig. 1E) on the basis of similar nomenclature. Differential genes identified by a Likelihood Ratio Test (Fig. 3E) were hierarchically clustered using the DEGreport package (<http://lpantano.github.io/DEGreport/>)(Pantano 2019) and plotted using the pheatmap package (Kolde 2019), both in R. Significant differences between two groups were evaluated using the hypergeometric test at [http://nemates.org/MA/progs/overlap\\_stats.html](http://nemates.org/MA/progs/overlap_stats.html). Ontologies for genes induced in gastric organoids (Figs. S1B-C) were determined using online tool enrichR (Chen et al. 2013; Kuleshov et al. 2016). Causal pathway analysis (Fig. S2A) was performed using QIAGEN Ingenuity Pathway Analysis (IPA) program under default parameters (Kramer et al. 2014). Differential gene expression between BE and stomach from Owen et al. was calculated using DESeq2 and used as input data for this analysis. Causal pathway analysis results were filtered for transcription factors and the activation z-scores were plotted using GraphPad Prism v9.2.0.

*scRNA-seq*. Single cell RNA-seq datasets (Busslinger et al. 2021; Nowicki-Osuch et al. 2021) and the respective metadata were downloaded. Normalized count data from Nowicki-Osuch et al. and raw count data from Busslinger et al. were processed into a Seurat format. We restricted further analysis to genes common to both datasets, which were normalized using SCTransform and integrated using Seurat's SCT integration protocol. Cell type assignments from each set's original metadata were retained in the integrated dataset. Cell clustering and UMAP plots were generated for the integrated dataset in Seurat. An undifferentiated gastric cell signature derived by Nowicki-Osuch et al. was determined by the average of the signature gene set counts in a cell (Nowicki-Osuch et al. 2021). Average scores in clusters were obtained by averaging cells within their respective clusters. An inbuilt table function in R was used to find overlapping counts between cell type assignment and cell cluster.

*CUT&RUN*. Sequence tags were analyzed using CUT&RUNTools (Zhu et al. 2019), a pipeline that includes alignment, trimming, length-based fragment filtering to identify fragments <120 bp, peak calling (MACS2)(Zhang et al. 2008), motif enrichment (Bailey et al. 2009), and DNA footprint analysis (Pique-Regi et al. 2011). A union set of MACS2-called narrow peaks from 3 intestinal villus CDX2 Cut&Run replicates was intersected with a union set of villus ATAC-seq and H3K27ac peaks (Saxena et al. 2017) to delineate the active CDX2-occupied cistrome (promoters and enhancers), which we used as input for the motif and footprint pipelines within

CUT&RUNTools. CDX2 peaks enriched for the motif and footprint were regarded to contact DNA directly, while the remaining regions were considered indirect binding sites.

*ChIP-seq*. DNA sequence tags were aligned against reference genome Hg19 using Bowtie2 v2.3.4.3(Langmead et al. 2009) and H3K27Ac-marked regions were identified using MACS v2.1.1 (<https://github.com/taoliu/MACS>) with the default cutoff  $q < 0.01$  (Zhang et al. 2008). H3K27Ac-marked regions located  $>2$  kb from TSSs were designated as enhancers and bigwig files were generated by align2rawsignal (<https://github.com/akundaje/align2rawsignal>). Data were visualized using the Integrative Genomics Viewer(Robinson et al. 2011); heatmaps were prepared using Deeptools (Ramirez et al. 2016) v2.5.0.

Super-enhancers (SEs) were identified using ROSE (Loven et al. 2013; Whyte et al. 2013). Briefly, peaks within 12.5 kb were stitched together and overall signal strength was calculated based on total read counts. Peaks overlapping transcription start sites were excluded using 2.5 kb as the distance threshold. Peak strength and distribution were scaled from 0-1 and peaks with strength above the inflection point (defined as the point on the x-axis where a line with slope=1 was tangential to the curve of signal strength) were identified as SEs.

We used the Coltron algorithm to identify tissue-restricted master TFs (Fig. 4C) (Ott et al. 2018). Briefly, mouse stomach and intestine SEs were identified from H3K27Ac ChIP-seq data and SEs adjacent to or overlapping with TF genes were used to identify tissue master TFs. SE datasets from stomach and intestine were merged and tissue-specific ATAC-seq peaks within SEs were used to identify motif enrichment for master TFs using FIMO (Grant et al. 2011). Total H3K27Ac signal on all promoters was calculated for each tissue and genes with signal higher than the 50<sup>th</sup> percentile were counted as expressed. If a master TF was not expressed in the stomach or intestine, its motif enrichment was not calculated in that tissue. Inward and outward binding were calculated as motif enrichment of master TFs within their own (inward) or other (outward) SEs. Scores for each master TF between stomach and intestine were subtracted to obtain the difference ( $\Delta$ ) in in/outward binding and hence identify tissue-restricted master TFs.

## References

- Baek S, Goldstein I, Hager GL. 2017. Bivariate Genomic Footprinting Detects Changes in Transcription Factor Activity. *Cell Rep* **19**: 1710-1722.
- Bailey TL, Boden M, Buske FA, Frith M, Grant CE, Clementi L, Ren J, Li WW, Noble WS. 2009. MEME SUITE: tools for motif discovery and searching. *Nucleic Acids Res* **37**: W202-208.

- Busslinger GA, Weusten BLA, Bogte A, Begthel H, Brosens LAA, Clevers H. 2021. Human gastrointestinal epithelia of the esophagus, stomach, and duodenum resolved at single-cell resolution. *Cell Rep* **34**: 108819.
- Chen EY, Tan CM, Kou Y, Duan Q, Wang Z, Meirelles GV, Clark NR, Ma'ayan A. 2013. Enrichr: interactive and collaborative HTML5 gene list enrichment analysis tool. *BMC Bioinformatics* **14**: 128.
- Companiononi O, Sanz-Anquela JM, Pardo ML, Puigdecenet E, Nonell L, Garcia N, Parra Blanco V, Lopez C, Andreu V, Cuatrecasas M et al. 2017. Gene expression study and pathway analysis of histological subtypes of intestinal metaplasia that progress to gastric cancer. *PLoS One* **12**: e0176043.
- Cornwell M, Vangala M, Taing L, Herbert Z, Koster J, Li B, Sun H, Li T, Zhang J, Qiu X et al. 2018. VIPER: Visualization Pipeline for RNA-seq, a Snakemake workflow for efficient and complete RNA-seq analysis. *BMC Bioinformatics* **19**: 135.
- Grant CE, Bailey TL, Noble WS. 2011. FIMO: scanning for occurrences of a given motif. *Bioinformatics* **27**: 1017-1018.
- Heinz S, Benner C, Spann N, Bertolino E, Lin YC, Laslo P, Cheng JX, Murre C, Singh H, Glass CK. 2010. Simple combinations of lineage-determining transcription factors prime cis-regulatory elements required for macrophage and B cell identities. *Mol Cell* **38**: 576-589.
- Jadhav U, Nalapareddy K, Saxena M, O'Neill NK, Pinello L, Yuan GC, Orkin SH, Shivdasani RA. 2016. Acquired Tissue-Specific Promoter Bivalency Is a Basis for PRC2 Necessity in Adult Cells. *Cell* **165**: 1389-1400.
- Kolde R. 2019. pheatmap: Pretty Heatmaps.
- Kramer A, Green J, Pollard J, Jr., Tugendreich S. 2014. Causal analysis approaches in Ingenuity Pathway Analysis. *Bioinformatics* **30**: 523-530.
- Kuleshov MV, Jones MR, Rouillard AD, Fernandez NF, Duan Q, Wang Z, Koplev S, Jenkins SL, Jagodnik KM, Lachmann A et al. 2016. Enrichr: a comprehensive gene set enrichment analysis web server 2016 update. *Nucleic Acids Res* **44**: W90-97.
- Langmead B, Trapnell C, Pop M, Salzberg SL. 2009. Ultrafast and memory-efficient alignment of short DNA sequences to the human genome. *Genome Biol* **10**: R25.
- Love MI, Huber W, Anders S. 2014. Moderated estimation of fold change and dispersion for RNA-seq data with DESeq2. *Genome Biol* **15**: 550.
- Loven J, Hoke HA, Lin CY, Lau A, Orlando DA, Vakoc CR, Bradner JE, Lee TI, Young RA. 2013. Selective inhibition of tumor oncogenes by disruption of super-enhancers. *Cell* **153**: 320-334.
- Miyoshi H, Stappenbeck TS. 2013. In vitro expansion and genetic modification of gastrointestinal stem cells in spheroid culture. *Nat Protoc* **8**: 2471-2482.
- Nowicki-Osuch K, Zhuang L, Jammula S, Bleaney CW, Mahbubani KT, Devonshire G, Katz-Summercorn A, Eling N, Wilbrey-Clark A, Madissoon E et al. 2021. Molecular phenotyping reveals the identity of Barrett's esophagus and its malignant transition. *Science* **373**: 760-767.

- Ott CJ, Federation AJ, Schwartz LS, Kasar S, Klitgaard JL, Lenci R, Li Q, Lawlor M, Fernandes SM, Souza A et al. 2018. Enhancer Architecture and Essential Core Regulatory Circuitry of Chronic Lymphocytic Leukemia. *Cancer Cell* **34**: 982-995 e987.
- Pantano L. 2019. DEGREport: Report of DEG analysis.
- Pinello L, Farouni R, Yuan GC. 2018. Haystack: systematic analysis of the variation of epigenetic states and cell-type specific regulatory elements. *Bioinformatics* **34**: 1930-1933.
- Pique-Regi R, Degner JF, Pai AA, Gaffney DJ, Gilad Y, Pritchard JK. 2011. Accurate inference of transcription factor binding from DNA sequence and chromatin accessibility data. *Genome Res* **21**: 447-455.
- Ramirez F, Dundar F, Diehl S, Gruning BA, Manke T. 2014. deepTools: a flexible platform for exploring deep-sequencing data. *Nucleic Acids Res* **42**: W187-191.
- Ramirez F, Ryan DP, Gruning B, Bhardwaj V, Kilpert F, Richter AS, Heyne S, Dundar F, Manke T. 2016. deepTools2: a next generation web server for deep-sequencing data analysis. *Nucleic Acids Res* **44**: W160-165.
- Robinson JT, Thorvaldsdottir H, Winckler W, Guttman M, Lander ES, Getz G, Mesirov JP. 2011. Integrative genomics viewer. *Nat Biotechnol* **29**: 24-26.
- Sarkar A, Huebner AJ, Sulahian R, Anselmo A, Xu X, Flattery K, Desai N, Sebastian C, Yram MA, Arnold K et al. 2016. Sox2 Suppresses Gastric Tumorigenesis in Mice. *Cell Rep* **16**: 1929-1941.
- Saxena M, Roman AKS, O'Neill NK, Sulahian R, Jadhav U, Shivdasani RA. 2017. Transcription factor-dependent 'anti-repressive' mammalian enhancers exclude H3K27me3 from extended genomic domains. *Genes Dev* **31**: 2391-2404.
- Subramanian A, Tamayo P, Mootha VK, Mukherjee S, Ebert BL, Gillette MA, Paulovich A, Pomeroy SL, Golub TR, Lander ES et al. 2005. Gene set enrichment analysis: a knowledge-based approach for interpreting genome-wide expression profiles. *Proc Natl Acad Sci U S A* **102**: 15545-15550.
- Wang S, Sun H, Ma J, Zang C, Wang C, Wang J, Tang Q, Meyer CA, Zhang Y, Liu XS. 2013. Target analysis by integration of transcriptome and ChIP-seq data with BETA. *Nat Protoc* **8**: 2502-2515.
- Whyte WA, Orlando DA, Hnisz D, Abraham BJ, Lin CY, Kagey MH, Rahl PB, Lee TI, Young RA. 2013. Master transcription factors and mediator establish super-enhancers at key cell identity genes. *Cell* **153**: 307-319.
- Zhang Y, Liu T, Meyer CA, Eeckhoute J, Johnson DS, Bernstein BE, Nusbaum C, Myers RM, Brown M, Li W et al. 2008. Model-based analysis of ChIP-Seq (MACS). *Genome Biol* **9**: R137.
- Zhu Q, Liu N, Orkin SH, Yuan GC. 2019. CUT&RUNTools: a flexible pipeline for CUT&RUN processing and footprint analysis. *Genome Biol* **20**: 192.

**Table S1. Genes activated in CDX2+ and HNF4A+ stomach organoids compared to GFP+ controls (Log2 fold-change >1, q <0.05)**

**CDX2 upregulated**

|             |          |          |           |           |          |           |          |
|-------------|----------|----------|-----------|-----------|----------|-----------|----------|
| Isx         | S100a7a  | Maoa     | Abcg5     | Trim15    | Spink4   | Aim2      | Ahnak    |
| Naip1       | H2-Q1    | Oxct2b   | Ceacam1   | Cbr2      | Kcnk5    | Serpinb9b | Fbp2     |
| Myo7b       | Tph1     | Car8     | Sema3e    | Ifi27l2b  | Stxbp1   | Slc17a3   | Prdm1    |
| Gucy2c      | Mgat4c   | Cdhr2    | Nlrp6     | Trpv6     | Exoc3l4  | Pgap1     | Steap1   |
| Il5ra       | Cldn15   | Slc6a7   | Dpysl3    | Chga      | St3gal3  | Cdc42ep3  | Fabp2    |
| Cdhr5       | Tmem236  | Abcg8    | Tmem200a  | Pyy       | Arhgap31 | Abhd3     | Oasl1    |
| Wnt3        | Clca4    | Anxa13   | Ms4a8a    | Mall      | Naip5    | Mapt      | Olfm4    |
| Ms4a10      | Pcsk5    | Guca2a   | Anks4b    | Rasgrf2   | Cd177    | Dkk2      | Btnl6    |
| Tbx3        | Aldob    | Cyp2c65  | Ctla2a    | Myom3     | Tmem246  | Fads1     | Tln2     |
| Prkg2       | Cyp2c55  | Ddc      | Pcsk1     | Gp1bb     | Il1rn    | Epha4     | Pde9a    |
| Cdx1        | AI747448 | Ctss     | Dse       | Zdhhc14   | Ces1g    | Cd38      | AA467197 |
| Prap1       | Rasa4    | Pmp22    | Nebi      | Hpcal4    | Reg4     | Ehd2      | Slc38a1  |
| Muc13       | Rhox5    | Slc30a10 | Ppp1r14d  | Disp2     | F3       | Parp8     | Mpp1     |
| Heph        | Tm4sf4   | Btnl4    | Slc17a4   | Ly6c1     | Aim1l    | B4galt4   | Slc18a1  |
| Lypd8       | Aoc1     | Evx1     | Bdnf      | B3gnt7    | Fam13a   | Gsta2     | Tmc5     |
| Clrn3       | Cdx2     | Sult1d1  | Myb       | Nr1h4     | Krt20    | Ckb       | Ggt6     |
| Trim31      | Pde4b    | Mmd      | Ttc7b     | Aldh1a3   | Ryr3     | Plgrkt    | Xkr5     |
| B4galnt2    | Slco2a1  | S100g    | Cidec     | Cwh43     | Cgref1   | Gdf15     | Tpm2     |
| Gsdmc2      | Atoh1    | Bmp3     | Phgr1     | Aqp1      | Entpd8   | Cdc42ep2  | Ank      |
| Cdh17       | Nat8l    | Dynap    | Myi7      | Acta1     | Akap2    | Slc40a1   | Sytl5    |
| Gpr128      | Clec2h   | Ceacam18 | Phospho1  | Syne1     | Gabrp    | Rasl11a   | Pde5a    |
| Tff3        | Cyp2c66  | Scg2     | Maf       | Hopx      | Tnfsf13b | Cited2    | Cldn3    |
| Tmem181c-ps | Otc      | Abi3     | Ntrk2     | Clec2e    | Pdlim1   | Tnfrsf14  | Pkp1     |
| Serpina1e   | Rbm11    | Bmp8b    | Cd200r2   | H2-Q10    | Cth      | Pycard    | Gstm6    |
| Plcl2       | Ccl6     | Clca6    | Dct       | Myo1a     | Tnfrsf8  | Atp10b    | Efnb2    |
| Fgf15       | Spsb4    | Grb10    | Slc2a12   | Fmo4      | Ston1    | Pde1b     | Mtm1     |
| Gngt2       | Abcb1a   | Ms4a18   | Lgals2    | Jag1      | Fbp1     | Tnfaip2   | Ripk3    |
| Tm4sf5      | Ugt1a1   | Plac8    | Cers4     | Areg      | Fam3c    | Tmem158   | Slc26a3  |
| Adcyap1     | Chst4    | Zfp462   | Gsta1     | Ahrr      | Depdc7   | Lrp4      | Guca2b   |
| Ush1c       | Cck      | Vipr1    | Kcnf1     | Calml4    | Nlrp9b   | Trim36    | Neto2    |
| Adh6a       | Dhrs9    | Syt7     | Fsd1l     | Hmga2-ps1 | Cyyr1    | Car12     | Gprin1   |
| Gsdmc4      | A1cf     | Emp1     | Rbp2      | Wfdc13    | Ankrd1   | Cytip     | Tnik     |
| BC030870    | Chgb     | Dsg3     | Upk3bl    | Npas2     | Wipf1    | Mt3       | Slc27a2  |
| Tm4sf20     | Ces2a    | Mettl7b  | Nid1      | Chp2      | Lgals3   | Ky        | Pcsk9    |
| Crn         | Fndc1    | Mgam     | Lef1      | Aldh1b1   | Pappa2   | Hsd17b13  | Rph3al   |
| Cyp4f14     | H2-Q2    | Cav1     | Serpinb1a | Alpi      | Tubb2b   | Ildr1     | Mfap3l   |
| Ugt1a7c     | Defa17   | Btnl5-ps | Sema4g    | Ceacam20  | Smim24   | Fam189a2  | Frat2    |
| Greb1       | Fcgbp    | Slc5a1   | Dach1     | Il22ra1   | Dfna5    | Ang4      | Lor      |
| Mep1b       | Themis3  | Ptprb    | Rassf2    | Mep1a     | Rnf157   | Lrat      | Tmem37   |
| Cyp2d34     | Sct      | P2rx2    | S100a14   | Scin      | Pipox    | Penk      | Tm4sf1   |
| Sis         | Laptm5   | Nt5c1a   | Atp2b4    | Cds1      | E2f2     | Rhof      | Slc25a43 |

**HNF4A upregulated**

|          |          |          |          |          |           |          |
|----------|----------|----------|----------|----------|-----------|----------|
|          |          | Prap1    | Agmat    | Pla2g12b | Dfna5     | Cd38     |
| Scn2b    | Hnf4g    | Cps1     | Tfr2     | Nid1     | Calml4    | Fgl2     |
| Dapk2    | Capg     | Myo7b    | Cyp2d10  | Glod5    | Cth       | Vipr1    |
| Map6     | Ctla2b   | Gucy2c   | Cdh17    | Cfb      | Ush1c     | Fabp2    |
| Kcnk6    | Rab31    | Cdhr5    | Btnl4    | Myo1a    | Nebi      | Hnf4a    |
| Serpina9 | Slc39a14 | Apoc2    | Mep1a    | Cidec    | Ifi27l2b  | Il22ra1  |
| Slc7a11  | Grtp1    | Aldob    | B4galnt2 | Abcb1a   | Onecut2   | Slc39a14 |
| Lpar1    | Krt4     | Trim31   | Apoa1    | Reg3b    | Unc5cl    | Phospho1 |
| Wbscr25  | Utp14b   | Tm4sf5   | Pcsk5    | Myb      | Exoc3l4   | Dak      |
| Cdca7    | Syk      | Clrn3    | Plcl2    | Ddc      | Itga1     | Wipf1    |
| Dusp6    | Nkain1   | A1cf     | Hsd17b2  | Plac8    | Tcea3     | Nr1i3    |
| Nmnat2   | Acot7    | Cyp2d34  | Ckb      | Wnt3     | Hopx      | Xylb     |
| B4galnt5 | Car13    | Cyp2c66  | Rdh7     | Ky       | Abcg2     | Lrp4     |
| Aprt     | Fyn      | Cyp2d26  | Tmem82   | Lrp2     | Igsf23    | Reg3g    |
| Pim1     | Pax8     | Cyp3a25  | Ppp1r14d | Gsta1    | Fcgbp     | Oasl1    |
| Metrl    | Prkca    | Isx      | Laptm5   | Aqp1     | Aldh1b1   | Disp2    |
| Cyp2d26  | Ces2c    | Prkg2    | Slco2a1  | Smim24   | Clca6     | Bdh1     |
| Dock5    | Pawr     | Tm4sf20  | Btnl5-ps | Nlrp6    | Serpib1a  | Trim40   |
| Stc2     | Slc2a9   | Slc6a7   | Aadac    | Tmem246  | Ggt6      | Tpmt     |
| Edn3     | Bdh1     | Lyz1     | Ugt1a7c  | Abcc6    | Adtrp     | Aqp11    |
| Rhoc     | Gulp1    | Cyp2c29  | Prlr     | Cdx2     | E2f2      | Pcsk9    |
| Elov16   | Ifi27    | Naip1    | Cdhr2    | Slc5a1   | Nr1i2     | Fbp2     |
| Cd274    | Itpk1    | Cyp4f14  | Clca4    | Mlxipl   | Fst       | Lef1     |
| Enpp2    | Stk32c   | Heph     | Abcg5    | Defa17   | Fbln1     | Npas2    |
| Rasa3    | Cxcl16   | Cyp2c68  | Anks4b   | Sema4g   | Kcnf1     | Kcnk5    |
| Pip5k1b  | Krt8     | Cyp2c55  | Gstm3    | Lgals2   | Fam20a    | Ehhadh   |
| Mgat5    | Vstm5    | Cyp2d9   | Ces1g    | Pnp2     | Zfp462    | Angptl4  |
| Mlxipl   | Ly6a     | Adh6a    | Fmo4     | Alpi     | Phgr1     | Grtp1    |
| Peli1    | Epsti1   | Muc13    | H2-Q10   | Cgref1   | Slc2a9    | Tmem54   |
| Cisd3    | Pgp      | Cdx1     | Acta1    | Slc17a4  | Tnik      | Jag1     |
| Phf21b   |          | Cldn15   | Apob     | Slc27a2  | Cyp3a11   | Ston1    |
| Slc4a11  |          | Pipox    | Cyp2c65  | Chgb     | Dach1     | Gcat     |
| Kalrn    |          | Otc      | Sult1d1  | Tmc5     | H2-Q1     | Phf21b   |
| Gipc2    |          | Mep1b    | Ttr      | Nags     | Cyp2d22   | Crip1    |
| Cd55     |          | Lypd8    | Ces2a    | Dpysl3   | Tubb2b    | Dse      |
| St6gal1  |          | Aoc1     | Tm6sf2   | Rasgrf2  | Ceacam1   | Dnm1     |
| Pvrl3    |          | Serpinf2 | Sult1b1  | H2-Q2    | Gprin3    | Pde5a    |
| Trim40   |          | Krt20    | Apoa4    | Ms4a8a   | Pklr      | B4galnt3 |
| Abcg2    |          | Mettl7b  | Fbp1     | Igf2bp3  | Eif4e3    | Dennd5b  |
| Rnasel   |          | Abcg8    | Cyp2b10  | Odf3b    | Soat2     | Cisd3    |
| Fam213a  |          | Tff3     | AI507597 | Abi3     | Cideb     | Rnf157   |
| Tnfrsf1b |          | Ms4a10   | Ces2e    | Akap2    | Hmga2-ps1 | Ada      |
| Atp8a2   |          | Slc7a9   | Mgam     | Dpyd     | Ttc7b     |          |
| Sytl2    |          | Hsd17b13 | Pnliprp2 | Themis3  | Naip5     |          |

**Table S2. Sequencing and quality parameters for ATAC-seq analysis of organoids**

| <b>CDX2+ gastric organoids</b>          |            |            |            |
|-----------------------------------------|------------|------------|------------|
|                                         | CDX2_Line1 | CDX2_Line2 | CDX2_Line3 |
| Total reads                             | 57,389,124 | 50,559,785 | 59,056,797 |
| MAPQ score > 30                         | 54,277,560 | 48,361,195 | 55,818,503 |
| Fraction of reads in peaks (FRiP) score | 0.07       | 0.06       | 0.16       |
| Non redundant fraction (NRF)            | 0.86       | 0.86       | 0.85       |
| PCR Bottlenecking coefficient (PBC) 1   | 0.86       | 0.86       | 0.85       |
| PCR Bottlenecking coefficient (PBC) 2   | 7.35       | 7.10       | 6.78       |

  

| <b>HNF4A+ gastric organoids</b>         |             |             |             |
|-----------------------------------------|-------------|-------------|-------------|
|                                         | HNF4A_Line1 | HNF4A_Line2 | HNF4A_Line3 |
| Total reads                             | 47,708,767  | 52,386,610  | 63,965,066  |
| MAPQ score > 30                         | 45,145,841  | 49,745,083  | 61,055,907  |
| Fraction of reads in peaks (FRiP) score | 0.08        | 0.16        | 0.26        |
| Non redundant fraction (NRF)            | 0.86        | 0.85        | 0.84        |
| PCR Bottlenecking coefficient (PBC) 1   | 0.86        | 0.85        | 0.84        |
| PCR Bottlenecking coefficient (PBC) 2   | 7.25        | 6.57        | 6.41        |

  

| <b>GFP+ gastric organoids</b>           |            |            |            |
|-----------------------------------------|------------|------------|------------|
|                                         | GFP_Line1  | GFP_Line2  | GFP_Line3  |
| Total reads                             | 56,588,547 | 58,990,891 | 57,596,775 |
| MAPQ score > 30                         | 53,538,131 | 56,465,451 | 54,821,685 |
| Fraction of reads in peaks (FRiP) score | 0.08       | 0.18       | 0.28       |
| Non redundant fraction (NRF)            | 0.84       | 0.85       | 0.84       |
| PCR Bottlenecking coefficient (PBC) 1   | 0.84       | 0.85       | 0.85       |
| PCR Bottlenecking coefficient (PBC) 2   | 6.34       | 6.79       | 6.58       |

  

| <b>Intestinal organoids</b>             |              |              |
|-----------------------------------------|--------------|--------------|
|                                         | Intorg_Line1 | Intorg_Line2 |
| Total reads                             | 67,341,079   | 51,265,782   |
| MAPQ score > 30                         | 65,140,806   | 49,121,445   |
| Fraction of reads in peaks (FRiP) score | 0.39         | 0.15         |
| Non redundant fraction (NRF)            | 0.85         | 0.86         |
| PCR Bottlenecking coefficient (PBC) 1   | 0.85         | 0.86         |
| PCR Bottlenecking coefficient (PBC) 2   | 6.78         | 7.35         |



**Suppl. Table S3. HNF4A binding regions identified using CUT&RUN**

| Binding regions in HNF4A+ gastric organoids |             |          | Binding regions in GFP+ (control) gastric organoids |             |           |
|---------------------------------------------|-------------|----------|-----------------------------------------------------|-------------|-----------|
| Chromosome                                  | Coordinates |          | Chromosome                                          | Coordinates |           |
| chr1                                        | 3514903     | 3515233  | chr1                                                | 3515024     | 3515193   |
| chr1                                        | 4538499     | 4538576  | chr1                                                | 24611652    | 24612011  |
| chr1                                        | 6804604     | 6804677  | chr1                                                | 24612106    | 24612699  |
| chr1                                        | 6973725     | 6974072  | chr1                                                | 24612864    | 24613055  |
| chr1                                        | 7088772     | 7088962  | chr1                                                | 24613216    | 24615572  |
| chr1                                        | 7498656     | 7498740  | chr1                                                | 24615664    | 24616107  |
| chr1                                        | 9535826     | 9535989  | chr1                                                | 37864965    | 37865057  |
| chr1                                        | 9748426     | 9748620  | chr1                                                | 58613905    | 58614022  |
| chr1                                        | 9748730     | 9748894  | chr1                                                | 95451936    | 95452046  |
| chr1                                        | 10257307    | 10257447 | chr1                                                | 102628211   | 102628306 |
| chr1                                        | 10285560    | 10285687 | chr1                                                | 157877278   | 157877384 |
| chr1                                        | 12000529    | 12000684 | chr1                                                | 167340306   | 167340387 |
| chr1                                        | 15615741    | 15615893 | chr1                                                | 179743686   | 179743856 |
| chr1                                        | 15877207    | 15877532 | chr1                                                | 183299149   | 183299588 |
| chr1                                        | 15908675    | 15908772 | chr1                                                | 192454038   | 192454128 |
| chr1                                        | 15937671    | 15937756 | chr1                                                | 193227811   | 193227924 |
| chr1                                        | 16199476    | 16199646 | chr1                                                | 195241698   | 195241868 |
| chr1                                        | 16228292    | 16228658 | chr1                                                | 195371720   | 195371935 |
| chr1                                        | 16235033    | 16235344 | chr10                                               | 3109929     | 3110053   |
| chr1                                        | 16241015    | 16241303 | chr10                                               | 16256467    | 16256546  |
| chr1                                        | 20820341    | 20820484 | chr10                                               | 19591789    | 19591868  |
| chr1                                        | 20863905    | 20864024 | chr10                                               | 22142299    | 22142379  |
| chr1                                        | 21132468    | 21132659 | chr10                                               | 22142493    | 22143043  |
| chr1                                        | 21482870    | 21483189 | chr10                                               | 26828817    | 26828995  |
| chr1                                        | 21499900    | 21500044 | chr10                                               | 37820461    | 37820541  |
| chr1                                        | 23255987    | 23256168 | chr10                                               | 70222386    | 70222476  |
| chr1                                        | 24611581    | 24612707 | chr10                                               | 96077627    | 96077717  |
| chr1                                        | 24612797    | 24613063 | chr10                                               | 118804654   | 118804742 |
| chr1                                        | 24613180    | 24616129 | chr10                                               | 130594790   | 130594986 |
| chr1                                        | 33691579    | 33691666 | chr11                                               | 3162631     | 3162733   |
| chr1                                        | 34120702    | 34120780 | chr11                                               | 31922693    | 31922785  |
| chr1                                        | 35931097    | 35931262 | chr11                                               | 34544920    | 34544998  |
| chr1                                        | 36093918    | 36094027 | chr11                                               | 34681855    | 34682171  |
| chr1                                        | 36244280    | 36244410 | chr11                                               | 54140080    | 54140294  |
| chr1                                        | 36271726    | 36271813 | chr11                                               | 54140523    | 54140671  |
| chr1                                        | 36547241    | 36547335 | chr11                                               | 57176103    | 57176190  |
| chr1                                        | 36647709    | 36647841 | chr11                                               | 98653099    | 98653205  |
| chr1                                        | 36920181    | 36920388 | chr11                                               | 105102990   | 105103070 |
| chr1                                        | 36971358    | 36971433 | chr11                                               | 109011650   | 109012079 |
| chr1                                        | 37026038    | 37026233 | chr11                                               | 121982367   | 121982529 |
| chr1                                        | 37027039    | 37027134 | chr12                                               | 3109871     | 3110107   |

|      |          |          |       |           |           |
|------|----------|----------|-------|-----------|-----------|
| chr1 | 37522233 | 37522379 | chr12 | 16747816  | 16747913  |
| chr1 | 37568459 | 37568540 | chr12 | 41515115  | 41515193  |
| chr1 | 37687765 | 37687858 | chr12 | 67059372  | 67059620  |
| chr1 | 37694780 | 37694858 | chr12 | 69654102  | 69654240  |
| chr1 | 37865103 | 37865330 | chr12 | 74804398  | 74804503  |
| chr1 | 37954712 | 37955015 | chr12 | 78350921  | 78351122  |
| chr1 | 38987501 | 38987673 | chr12 | 93577042  | 93577180  |
| chr1 | 39105605 | 39105722 | chr12 | 97061437  | 97061786  |
| chr1 | 39235282 | 39235434 | chr12 | 105524744 | 105524824 |
| chr1 | 39936545 | 39936651 | chr12 | 120028690 | 120029021 |
| chr1 | 40194372 | 40194469 | chr13 | 3372936   | 3373329   |
| chr1 | 40632784 | 40632998 | chr13 | 3373458   | 3373560   |
| chr1 | 41390262 | 41390571 | chr13 | 9834313   | 9834483   |
| chr1 | 43152753 | 43152938 | chr13 | 29986125  | 29986288  |
| chr1 | 43306049 | 43306209 | chr13 | 44869574  | 44869683  |
| chr1 | 43423535 | 43423628 | chr13 | 44869914  | 44870001  |
| chr1 | 43447269 | 43447389 | chr13 | 53269906  | 53269991  |
| chr1 | 43521727 | 43521851 | chr13 | 74530507  | 74530599  |
| chr1 | 43819253 | 43819335 | chr13 | 77438908  | 77439049  |
| chr1 | 45795446 | 45795523 | chr13 | 99790926  | 99791032  |
| chr1 | 45910054 | 45910152 | chr13 | 112578183 | 112578297 |
| chr1 | 46076091 | 46076165 | chr13 | 116192900 | 116192990 |
| chr1 | 46888176 | 46888265 | chr13 | 119599022 | 119599148 |
| chr1 | 50480746 | 50480891 | chr13 | 120321441 | 120321639 |
| chr1 | 51112117 | 51112190 | chr14 | 8286653   | 8286837   |
| chr1 | 51243318 | 51243487 | chr14 | 19415720  | 19415943  |
| chr1 | 51288791 | 51289035 | chr14 | 19416129  | 19416259  |
| chr1 | 51478550 | 51478654 | chr14 | 19416913  | 19417056  |
| chr1 | 51509224 | 51509463 | chr14 | 19417140  | 19417648  |
| chr1 | 51584972 | 51585054 | chr14 | 19417795  | 19417941  |
| chr1 | 52233312 | 52233421 | chr14 | 19418161  | 19418297  |
| chr1 | 52456809 | 52456940 | chr14 | 19418571  | 19418905  |
| chr1 | 54600453 | 54600547 | chr14 | 19419186  | 19419363  |
| chr1 | 54604128 | 54604222 | chr14 | 47629447  | 47629550  |
| chr1 | 55173921 | 55174019 | chr14 | 52104190  | 52104280  |
| chr1 | 56782266 | 56782343 | chr14 | 67715808  | 67715890  |
| chr1 | 56897656 | 56897761 | chr14 | 69161992  | 69162093  |
| chr1 | 58353609 | 58353827 | chr14 | 86198995  | 86199139  |
| chr1 | 58366947 | 58367053 | chr14 | 90911190  | 90911275  |
| chr1 | 58504996 | 58505087 | chr14 | 101853948 | 101854050 |
| chr1 | 58613911 | 58614022 | chr14 | 104715792 | 104715926 |
| chr1 | 58742522 | 58742766 | chr14 | 122568970 | 122569079 |
| chr1 | 58795369 | 58795480 | chr14 | 124801563 | 124802179 |
| chr1 | 59321575 | 59321762 | chr15 | 25663234  | 25663427  |
| chr1 | 59481945 | 59482029 | chr15 | 36899004  | 36899086  |

|      |          |          |       |           |           |
|------|----------|----------|-------|-----------|-----------|
| chr1 | 59912900 | 59912982 | chr15 | 47539996  | 47540104  |
| chr1 | 60180396 | 60180493 | chr15 | 75085506  | 75085850  |
| chr1 | 60669133 | 60669213 | chr15 | 75086021  | 75086141  |
| chr1 | 60827083 | 60827313 | chr15 | 75086256  | 75086561  |
| chr1 | 61620785 | 61620956 | chr15 | 75086642  | 75087043  |
| chr1 | 63005048 | 63005223 | chr15 | 75868320  | 75868439  |
| chr1 | 63129812 | 63129966 | chr15 | 99099339  | 99099453  |
| chr1 | 64121698 | 64121790 | chr15 | 102405768 | 102406084 |
| chr1 | 64690731 | 64690842 | chr16 | 3114925   | 3115110   |
| chr1 | 64787697 | 64787943 | chr16 | 3116267   | 3116385   |
| chr1 | 64809179 | 64809466 | chr16 | 3116533   | 3116653   |
| chr1 | 64859975 | 64860091 | chr16 | 3349924   | 3350449   |
| chr1 | 64942126 | 64942248 | chr16 | 3351408   | 3351596   |
| chr1 | 65118654 | 65118784 | chr16 | 5709170   | 5709254   |
| chr1 | 67113434 | 67113637 | chr16 | 11143927  | 11144312  |
| chr1 | 69457549 | 69457717 | chr16 | 17222286  | 17222441  |
| chr1 | 69786833 | 69786907 | chr16 | 18533210  | 18533329  |
| chr1 | 71004263 | 71004506 | chr16 | 30829550  | 30829630  |
| chr1 | 71102999 | 71103139 | chr16 | 35981685  | 35981805  |
| chr1 | 71557121 | 71557210 | chr16 | 52333840  | 52333927  |
| chr1 | 71837396 | 71837551 | chr16 | 57391466  | 57391668  |
| chr1 | 72255129 | 72255282 | chr16 | 86820809  | 86820973  |
| chr1 | 73027491 | 73027647 | chr16 | 93789193  | 93789289  |
| chr1 | 73683572 | 73683699 | chr16 | 98107527  | 98107767  |
| chr1 | 73844812 | 73844939 | chr17 | 3080677   | 3080761   |
| chr1 | 74249466 | 74249581 | chr17 | 13590414  | 13590669  |
| chr1 | 74284805 | 74284922 | chr17 | 13654639  | 13655145  |
| chr1 | 74295450 | 74295616 | chr17 | 24527921  | 24528028  |
| chr1 | 74307241 | 74307413 | chr17 | 31570436  | 31570530  |
| chr1 | 74332387 | 74332501 | chr17 | 36231256  | 36231342  |
| chr1 | 74409243 | 74409396 | chr17 | 36231432  | 36231581  |
| chr1 | 74434646 | 74434885 | chr17 | 39846851  | 39847302  |
| chr1 | 74435828 | 74435917 | chr17 | 39847478  | 39848070  |
| chr1 | 74726754 | 74726885 | chr17 | 50570378  | 50570466  |
| chr1 | 75180467 | 75180557 | chr17 | 70963678  | 70963826  |
| chr1 | 75192015 | 75192089 | chr17 | 85541443  | 85541626  |
| chr1 | 75317340 | 75317435 | chr18 | 3004806   | 3004960   |
| chr1 | 75317586 | 75317861 | chr18 | 3005259   | 3005513   |
| chr1 | 77469109 | 77469204 | chr18 | 3005670   | 3005974   |
| chr1 | 77476011 | 77476118 | chr18 | 40308038  | 40308310  |
| chr1 | 77695341 | 77695602 | chr18 | 48010416  | 48010511  |
| chr1 | 78313079 | 78313172 | chr18 | 68692070  | 68692255  |
| chr1 | 78483504 | 78483703 | chr18 | 69303854  | 69303966  |
| chr1 | 78657723 | 78657828 | chr18 | 90602187  | 90602595  |
| chr1 | 81633849 | 81633932 | chr19 | 45649984  | 45650224  |

|      |           |           |       |           |           |
|------|-----------|-----------|-------|-----------|-----------|
| chr1 | 82414759  | 82414847  | chr19 | 61199701  | 61199814  |
| chr1 | 82429247  | 82429375  | chr19 | 61264402  | 61264482  |
| chr1 | 82787602  | 82787675  | chr19 | 61331288  | 61331551  |
| chr1 | 82815966  | 82816096  | chr2  | 3050134   | 3050372   |
| chr1 | 85790766  | 85790907  | chr2  | 3964505   | 3964608   |
| chr1 | 85810845  | 85811010  | chr2  | 5379149   | 5379380   |
| chr1 | 85864524  | 85864608  | chr2  | 22587743  | 22587860  |
| chr1 | 86056360  | 86056449  | chr2  | 22587980  | 22588114  |
| chr1 | 86271862  | 86271993  | chr2  | 22588832  | 22588989  |
| chr1 | 86359413  | 86359557  | chr2  | 22589213  | 22589309  |
| chr1 | 86470634  | 86470966  | chr2  | 22589610  | 22590169  |
| chr1 | 86764701  | 86764820  | chr2  | 57629489  | 57629672  |
| chr1 | 87551199  | 87551344  | chr2  | 60510815  | 60510950  |
| chr1 | 87573832  | 87574054  | chr2  | 69355545  | 69355652  |
| chr1 | 87574866  | 87575035  | chr2  | 71083941  | 71084057  |
| chr1 | 87579106  | 87579242  | chr2  | 73867935  | 73868033  |
| chr1 | 87779301  | 87779529  | chr2  | 98662237  | 98662964  |
| chr1 | 87892605  | 87892710  | chr2  | 98665047  | 98665207  |
| chr1 | 88428514  | 88428615  | chr2  | 98666248  | 98667327  |
| chr1 | 88437864  | 88437988  | chr2  | 109917532 | 109917641 |
| chr1 | 88534238  | 88534356  | chr2  | 163558966 | 163559057 |
| chr1 | 88764156  | 88764249  | chr2  | 163566154 | 163566316 |
| chr1 | 88954848  | 88955088  | chr2  | 164769739 | 164769826 |
| chr1 | 89015554  | 89015635  | chr2  | 181917427 | 181917534 |
| chr1 | 89070105  | 89070283  | chr2  | 181917615 | 181917935 |
| chr1 | 90112893  | 90112988  | chr2  | 181918605 | 181918699 |
| chr1 | 90601308  | 90601394  | chr2  | 181929041 | 181929132 |
| chr1 | 90718813  | 90719085  | chr2  | 181929223 | 181929355 |
| chr1 | 91041758  | 91041863  | chr2  | 181930854 | 181930989 |
| chr1 | 91442708  | 91442893  | chr2  | 182012768 | 182013202 |
| chr1 | 91490541  | 91490615  | chr3  | 5860344   | 5860799   |
| chr1 | 91578144  | 91578285  | chr3  | 8245311   | 8245416   |
| chr1 | 92180370  | 92180593  | chr3  | 8245930   | 8246012   |
| chr1 | 93160904  | 93160985  | chr3  | 8246245   | 8246536   |
| chr1 | 93343548  | 93343623  | chr3  | 21698445  | 21698529  |
| chr1 | 93635865  | 93635978  | chr3  | 87425127  | 87425213  |
| chr1 | 93654904  | 93655043  | chr3  | 96044619  | 96044886  |
| chr1 | 93688416  | 93688549  | chr3  | 108017961 | 108018044 |
| chr1 | 93949034  | 93949164  | chr3  | 128210043 | 128210121 |
| chr1 | 95451938  | 95452051  | chr3  | 128936721 | 128936805 |
| chr1 | 96805467  | 96805559  | chr3  | 149052633 | 149052860 |
| chr1 | 97997351  | 97997432  | chr3  | 159939415 | 159939680 |
| chr1 | 98139465  | 98139626  | chr4  | 20191851  | 20191951  |
| chr1 | 102628210 | 102628326 | chr4  | 28176927  | 28177016  |
| chr1 | 105925721 | 105925810 | chr4  | 31354186  | 31354264  |

|      |           |           |              |           |           |
|------|-----------|-----------|--------------|-----------|-----------|
| chr1 | 106171511 | 106171589 | chr4         | 64497854  | 64498060  |
| chr1 | 106400964 | 106401038 | chr4         | 70378118  | 70378246  |
| chr1 | 106449814 | 106449999 | chr4         | 80002902  | 80002991  |
| chr1 | 106477827 | 106478125 | chr4         | 116672795 | 116672964 |
| chr1 | 106591556 | 106591643 | chr4         | 118547888 | 118548109 |
| chr1 | 106596495 | 106596692 | chr4         | 118548241 | 118548362 |
| chr1 | 106629578 | 106629660 | chr4         | 118548519 | 118548719 |
| chr1 | 106876200 | 106876447 | chr4         | 138378496 | 138378587 |
| chr1 | 118458450 | 118458526 | chr4         | 153153052 | 153153186 |
| chr1 | 120357420 | 120357558 | chr4         | 154294333 | 154294494 |
| chr1 | 121463955 | 121464046 | chr4_GL4562: | 49124     | 49299     |
| chr1 | 125482026 | 125482222 | chr5         | 9028370   | 9028462   |
| chr1 | 125489368 | 125489647 | chr5         | 34187812  | 34187890  |
| chr1 | 125551712 | 125551904 | chr5         | 36630520  | 36630767  |
| chr1 | 125560871 | 125560967 | chr5         | 36660989  | 36661201  |
| chr1 | 125694489 | 125694701 | chr5         | 44113202  | 44113386  |
| chr1 | 125701889 | 125701999 | chr5         | 60042915  | 60043033  |
| chr1 | 125721465 | 125721558 | chr5         | 87536168  | 87536247  |
| chr1 | 126673181 | 126673365 | chr5         | 114922457 | 114922554 |
| chr1 | 127257283 | 127257364 | chr5         | 131573661 | 131573742 |
| chr1 | 128103062 | 128103250 | chr5         | 146260999 | 146261349 |
| chr1 | 128535638 | 128535808 | chr5         | 151734552 | 151734684 |
| chr1 | 130397323 | 130397409 | chr6         | 3200905   | 3201100   |
| chr1 | 130715901 | 130715991 | chr6         | 3201190   | 3201274   |
| chr1 | 130820434 | 130820532 | chr6         | 3201365   | 3201567   |
| chr1 | 130821065 | 130821212 | chr6         | 4762443   | 4762534   |
| chr1 | 131123539 | 131123657 | chr6         | 4923963   | 4924156   |
| chr1 | 131153064 | 131153196 | chr6         | 9889961   | 9890152   |
| chr1 | 131527435 | 131527781 | chr6         | 48121215  | 48121377  |
| chr1 | 131752228 | 131752323 | chr6         | 49236459  | 49236586  |
| chr1 | 131910346 | 131910478 | chr6         | 56233662  | 56233747  |
| chr1 | 131977067 | 131977198 | chr6         | 103314603 | 103314722 |
| chr1 | 132006189 | 132006353 | chr6         | 103649086 | 103649293 |
| chr1 | 132095631 | 132095895 | chr6         | 145932915 | 145933010 |
| chr1 | 132150371 | 132150545 | chr7         | 19715535  | 19715621  |
| chr1 | 132315990 | 132316108 | chr7         | 25077089  | 25077189  |
| chr1 | 133057723 | 133058024 | chr7         | 26779943  | 26780037  |
| chr1 | 133093852 | 133094089 | chr7         | 40677765  | 40677872  |
| chr1 | 133146203 | 133146278 | chr7         | 45814452  | 45814575  |
| chr1 | 133190664 | 133190817 | chr7         | 59769928  | 59770013  |
| chr1 | 133226996 | 133227160 | chr7         | 109602753 | 109602854 |
| chr1 | 133463213 | 133463465 | chr7         | 110648884 | 110649051 |
| chr1 | 133618419 | 133618540 | chr7         | 128910234 | 128910407 |
| chr1 | 133685891 | 133686062 | chr7         | 130834516 | 130834603 |
| chr1 | 133695916 | 133696077 | chr7         | 145340942 | 145341422 |

|      |           |           |      |           |           |
|------|-----------|-----------|------|-----------|-----------|
| chr1 | 133779051 | 133779134 | chr8 | 3754395   | 3754493   |
| chr1 | 133882688 | 133882857 | chr8 | 15519850  | 15520076  |
| chr1 | 134065505 | 134065580 | chr8 | 20157108  | 20157192  |
| chr1 | 134099312 | 134099398 | chr8 | 73319655  | 73319741  |
| chr1 | 134216974 | 134217203 | chr8 | 83756872  | 83756986  |
| chr1 | 135199161 | 135199413 | chr8 | 95807571  | 95807653  |
| chr1 | 135204825 | 135204901 | chr8 | 125779090 | 125779172 |
| chr1 | 135217804 | 135217885 | chr8 | 129301117 | 129301213 |
| chr1 | 135227525 | 135227665 | chr9 | 3000018   | 3000150   |
| chr1 | 135236897 | 135237051 | chr9 | 3000279   | 3000637   |
| chr1 | 135258488 | 135258608 | chr9 | 3000904   | 3001039   |
| chr1 | 135853283 | 135853367 | chr9 | 3001150   | 3001523   |
| chr1 | 135863913 | 135863986 | chr9 | 3002047   | 3002327   |
| chr1 | 136058711 | 136058910 | chr9 | 3002710   | 3002805   |
| chr1 | 136220480 | 136220563 | chr9 | 3003334   | 3003481   |
| chr1 | 136364891 | 136364969 | chr9 | 3004157   | 3004240   |
| chr1 | 137907008 | 137907229 | chr9 | 3004558   | 3004752   |
| chr1 | 138348667 | 138348786 | chr9 | 3006386   | 3006497   |
| chr1 | 138370197 | 138370331 | chr9 | 3006712   | 3006885   |
| chr1 | 138576496 | 138576570 | chr9 | 3007125   | 3007312   |
| chr1 | 138928698 | 138928938 | chr9 | 3007564   | 3007664   |
| chr1 | 150027309 | 150027428 | chr9 | 3009308   | 3009627   |
| chr1 | 151755061 | 151755321 | chr9 | 3009745   | 3009844   |
| chr1 | 152904641 | 152904718 | chr9 | 3009984   | 3010083   |
| chr1 | 153040232 | 153040408 | chr9 | 3012243   | 3012378   |
| chr1 | 153300513 | 153300660 | chr9 | 3012760   | 3013099   |
| chr1 | 153401860 | 153401945 | chr9 | 3013203   | 3013308   |
| chr1 | 153957920 | 153958077 | chr9 | 3013436   | 3013536   |
| chr1 | 153962314 | 153962393 | chr9 | 3014058   | 3014346   |
| chr1 | 154112620 | 154112694 | chr9 | 3015299   | 3015449   |
| chr1 | 155074954 | 155075144 | chr9 | 3017062   | 3017192   |
| chr1 | 155102535 | 155102608 | chr9 | 3017932   | 3018079   |
| chr1 | 155139025 | 155139117 | chr9 | 3018317   | 3018676   |
| chr1 | 155500093 | 155500172 | chr9 | 3019887   | 3019975   |
| chr1 | 155621183 | 155621313 | chr9 | 3020191   | 3020317   |
| chr1 | 156615761 | 156615905 | chr9 | 3020459   | 3020557   |
| chr1 | 156819333 | 156819607 | chr9 | 3020842   | 3021122   |
| chr1 | 157081412 | 157081607 | chr9 | 3022082   | 3022231   |
| chr1 | 157525932 | 157526165 | chr9 | 3022473   | 3022590   |
| chr1 | 157633681 | 157633859 | chr9 | 3023493   | 3023702   |
| chr1 | 157877273 | 157877383 | chr9 | 3023847   | 3023935   |
| chr1 | 160124072 | 160124276 | chr9 | 3024076   | 3024212   |
| chr1 | 160194989 | 160195100 | chr9 | 3024406   | 3024635   |
| chr1 | 160309218 | 160309304 | chr9 | 3025020   | 3025141   |
| chr1 | 160520904 | 160521004 | chr9 | 3025487   | 3025611   |

|      |           |           |      |           |           |
|------|-----------|-----------|------|-----------|-----------|
| chr1 | 161876751 | 161876964 | chr9 | 3025690   | 3025805   |
| chr1 | 162946846 | 162947075 | chr9 | 3027107   | 3027251   |
| chr1 | 163779555 | 163779635 | chr9 | 3028515   | 3028658   |
| chr1 | 164162932 | 164163008 | chr9 | 3029689   | 3029856   |
| chr1 | 164248756 | 164248876 | chr9 | 3030600   | 3030679   |
| chr1 | 164420737 | 164420961 | chr9 | 3031229   | 3031317   |
| chr1 | 164461021 | 164461100 | chr9 | 3031667   | 3031816   |
| chr1 | 164495302 | 164495396 | chr9 | 3032410   | 3032672   |
| chr1 | 164522876 | 164522985 | chr9 | 3032849   | 3032949   |
| chr1 | 164537686 | 164537837 | chr9 | 3034381   | 3034501   |
| chr1 | 164703682 | 164703836 | chr9 | 3034863   | 3035235   |
| chr1 | 165348800 | 165348903 | chr9 | 3035366   | 3035446   |
| chr1 | 165616750 | 165616879 | chr9 | 3036006   | 3036102   |
| chr1 | 165759650 | 165759723 | chr9 | 3036239   | 3036334   |
| chr1 | 165763696 | 165763779 | chr9 | 3037183   | 3037263   |
| chr1 | 166130229 | 166130422 | chr9 | 3037881   | 3038254   |
| chr1 | 167340284 | 167340387 | chr9 | 3258821   | 3258912   |
| chr1 | 167387347 | 167387597 | chr9 | 24542015  | 24542161  |
| chr1 | 168432399 | 168432607 | chr9 | 27213168  | 27213263  |
| chr1 | 168659780 | 168659870 | chr9 | 35305219  | 35305590  |
| chr1 | 169969218 | 169969361 | chr9 | 56223830  | 56223949  |
| chr1 | 170175007 | 170175240 | chr9 | 81225112  | 81225198  |
| chr1 | 170478944 | 170479028 | chr9 | 95425928  | 95426026  |
| chr1 | 170981534 | 170981920 | chr9 | 96853033  | 96853117  |
| chr1 | 171184393 | 171184480 | chr9 | 110281274 | 110281357 |
| chr1 | 171213845 | 171213989 | chr9 | 115350828 | 115350925 |
| chr1 | 171222600 | 171222717 | chr9 | 123461912 | 123462177 |
| chr1 | 171437390 | 171437463 | chr9 | 123924487 | 123924582 |
| chr1 | 171441475 | 171441699 | chr9 | 124256382 | 124256464 |
| chr1 | 172311620 | 172311740 | chrX | 76598868  | 76599129  |
| chr1 | 172376400 | 172376524 | chrX | 112370962 | 112371090 |
| chr1 | 172432353 | 172432498 | chrX | 118904415 | 118904499 |
| chr1 | 172461653 | 172461865 | chrX | 129056564 | 129056655 |
| chr1 | 172633039 | 172633187 | chrX | 143483003 | 143483112 |
| chr1 | 173418919 | 173419011 | chrX | 170004328 | 170004408 |
| chr1 | 174826682 | 174826943 | chrX | 170673295 | 170673416 |
| chr1 | 175692738 | 175692847 | chrX | 170758250 | 170758490 |
| chr1 | 175725962 | 175726049 | chrX | 170881066 | 170881274 |
| chr1 | 176814654 | 176814839 | chrY | 140588    | 140697    |
| chr1 | 176982777 | 176982881 | chrY | 142862    | 142940    |
| chr1 | 177007179 | 177007257 | chrY | 145834    | 145913    |
| chr1 | 177442015 | 177442175 | chrY | 259085    | 259364    |
| chr1 | 177729242 | 177729433 | chrY | 261188    | 261275    |
| chr1 | 177744795 | 177744906 | chrY | 4036623   | 4036725   |
| chr1 | 177745018 | 177745209 | chrY | 11858091  | 11858199  |

|      |           |           |      |          |          |
|------|-----------|-----------|------|----------|----------|
| chr1 | 177983188 | 177983432 | chrY | 12752763 | 12752852 |
| chr1 | 178187413 | 178187621 |      |          |          |
| chr1 | 178329981 | 178330155 |      |          |          |
| chr1 | 178600999 | 178601144 |      |          |          |
| chr1 | 179546272 | 179546399 |      |          |          |
| chr1 | 179568808 | 179568882 |      |          |          |
| chr1 | 179743661 | 179743916 |      |          |          |
| chr1 | 179913569 | 179913727 |      |          |          |
| chr1 | 180279775 | 180279955 |      |          |          |
| chr1 | 180387511 | 180387757 |      |          |          |
| chr1 | 180502653 | 180502732 |      |          |          |
| chr1 | 180757900 | 180758079 |      |          |          |
| chr1 | 180778345 | 180778435 |      |          |          |
| chr1 | 180914040 | 180914173 |      |          |          |
| chr1 | 180952519 | 180952610 |      |          |          |
| chr1 | 181000571 | 181000667 |      |          |          |
| chr1 | 181038280 | 181038442 |      |          |          |
| chr1 | 181230886 | 181231003 |      |          |          |
| chr1 | 181258295 | 181258432 |      |          |          |
| chr1 | 181623438 | 181623533 |      |          |          |
| chr1 | 181860772 | 181860863 |      |          |          |
| chr1 | 182015795 | 182015904 |      |          |          |
| chr1 | 182238279 | 182238352 |      |          |          |
| chr1 | 182238489 | 182238566 |      |          |          |
| chr1 | 182256348 | 182256460 |      |          |          |
| chr1 | 182564921 | 182565028 |      |          |          |
| chr1 | 183048094 | 183048278 |      |          |          |
| chr1 | 183299139 | 183299571 |      |          |          |
| chr1 | 183378410 | 183378550 |      |          |          |
| chr1 | 183972381 | 183972465 |      |          |          |
| chr1 | 184034162 | 184034348 |      |          |          |
| chr1 | 184057650 | 184057731 |      |          |          |
| chr1 | 184071879 | 184072023 |      |          |          |
| chr1 | 184852435 | 184852625 |      |          |          |
| chr1 | 184911977 | 184912097 |      |          |          |
| chr1 | 185282898 | 185283099 |      |          |          |
| chr1 | 185312036 | 185312145 |      |          |          |
| chr1 | 189006326 | 189006449 |      |          |          |
| chr1 | 189688165 | 189688271 |      |          |          |
| chr1 | 189727378 | 189727492 |      |          |          |
| chr1 | 189761610 | 189761685 |      |          |          |
| chr1 | 189761800 | 189761973 |      |          |          |
| chr1 | 190186594 | 190186723 |      |          |          |
| chr1 | 191026143 | 191026383 |      |          |          |
| chr1 | 191277885 | 191278023 |      |          |          |



|       |           |           |
|-------|-----------|-----------|
| chr1  | 191785243 | 191785320 |
| chr1  | 191802195 | 191802280 |
| chr1  | 191839371 | 191839465 |
| chr1  | 191946946 | 191947053 |
| chr1  | 192311398 | 192311515 |
| chr1  | 192454038 | 192454128 |
| chr1  | 193227816 | 193227913 |
| chr1  | 193327016 | 193327106 |
| chr1  | 194660566 | 194660667 |
| chr1  | 194671946 | 194672135 |
| chr1  | 194677927 | 194678054 |
| chr1  | 195241582 | 195241879 |
| chr1  | 195371721 | 195371945 |
| chr10 | 3113755   | 3113905   |
| chr10 | 3114883   | 3114971   |
| chr10 | 3540108   | 3540291   |
| chr10 | 3941354   | 3941542   |
| chr10 | 4105820   | 4105980   |
| chr10 | 4395372   | 4395531   |
| chr10 | 4620993   | 4621116   |
| chr10 | 5807804   | 5807961   |
| chr10 | 5824154   | 5824458   |
| chr10 | 7140425   | 7140506   |
| chr10 | 7159272   | 7159472   |
| chr10 | 8096008   | 8096265   |
| chr10 | 9235202   | 9235345   |
| chr10 | 9503880   | 9504084   |
| chr10 | 9528214   | 9528359   |
| chr10 | 9603600   | 9603675   |
| chr10 | 9718291   | 9718378   |
| chr10 | 10555353  | 10555491  |
| chr10 | 11350677  | 11350789  |
| chr10 | 11492106  | 11492183  |
| chr10 | 12726327  | 12726598  |
| chr10 | 13375848  | 13375984  |
| chr10 | 13446973  | 13447129  |
| chr10 | 13850318  | 13850486  |
| chr10 | 13983803  | 13983905  |
| chr10 | 16256335  | 16256639  |
| chr10 | 16601046  | 16601235  |
| chr10 | 17222016  | 17222102  |
| chr10 | 17576385  | 17576511  |
| chr10 | 18407549  | 18407645  |
| chr10 | 18844608  | 18844694  |
| chr10 | 19531504  | 19531803  |

|       |          |          |
|-------|----------|----------|
| chr10 | 19591724 | 19591916 |
| chr10 | 19991273 | 19991489 |
| chr10 | 20077331 | 20077413 |
| chr10 | 20186943 | 20187191 |
| chr10 | 21091036 | 21091159 |
| chr10 | 21093133 | 21093237 |
| chr10 | 21686320 | 21686396 |
| chr10 | 22058688 | 22058763 |
| chr10 | 22142299 | 22143044 |
| chr10 | 23800093 | 23800204 |
| chr10 | 23959189 | 23959369 |
| chr10 | 24132457 | 24132557 |
| chr10 | 24138981 | 24139157 |
| chr10 | 24397379 | 24397463 |
| chr10 | 24446354 | 24446488 |
| chr10 | 24478660 | 24478778 |
| chr10 | 24629218 | 24629315 |
| chr10 | 24995908 | 24996034 |
| chr10 | 25192855 | 25192945 |
| chr10 | 25434881 | 25434964 |
| chr10 | 25918287 | 25918471 |
| chr10 | 26494514 | 26494672 |
| chr10 | 26544943 | 26545161 |
| chr10 | 26780656 | 26780738 |
| chr10 | 26799621 | 26799807 |
| chr10 | 26828710 | 26829082 |
| chr10 | 26920492 | 26920574 |
| chr10 | 26996028 | 26996300 |
| chr10 | 28228374 | 28228498 |
| chr10 | 28460085 | 28460183 |
| chr10 | 29816031 | 29816120 |
| chr10 | 29846680 | 29846838 |
| chr10 | 31592225 | 31592330 |
| chr10 | 31597364 | 31597517 |
| chr10 | 32984886 | 32985204 |
| chr10 | 37214795 | 37214900 |
| chr10 | 37292244 | 37292334 |
| chr10 | 37325924 | 37326115 |
| chr10 | 37820468 | 37820541 |
| chr10 | 39678410 | 39678634 |
| chr10 | 39907304 | 39907517 |
| chr10 | 40328362 | 40328539 |
| chr10 | 40349201 | 40349337 |
| chr10 | 40444047 | 40444178 |
| chr10 | 40499966 | 40500167 |

|       |          |          |
|-------|----------|----------|
| chr10 | 40511219 | 40511457 |
| chr10 | 41552821 | 41552928 |
| chr10 | 42082357 | 42082496 |
| chr10 | 42723568 | 42723779 |
| chr10 | 42723967 | 42724072 |
| chr10 | 42848875 | 42849103 |
| chr10 | 42849203 | 42849291 |
| chr10 | 42892374 | 42892582 |
| chr10 | 43575123 | 43575235 |
| chr10 | 43602220 | 43602450 |
| chr10 | 43641634 | 43641763 |
| chr10 | 43694104 | 43694220 |
| chr10 | 43783284 | 43783377 |
| chr10 | 44112070 | 44112229 |
| chr10 | 45001028 | 45001119 |
| chr10 | 48067079 | 48067279 |
| chr10 | 52232180 | 52232433 |
| chr10 | 54073621 | 54073762 |
| chr10 | 57763128 | 57763389 |
| chr10 | 58255411 | 58255503 |
| chr10 | 58323280 | 58323389 |
| chr10 | 58446634 | 58446708 |
| chr10 | 59241138 | 59241232 |
| chr10 | 59241386 | 59241476 |
| chr10 | 59292623 | 59292717 |
| chr10 | 59323133 | 59323274 |
| chr10 | 59578633 | 59578723 |
| chr10 | 59616750 | 59616845 |
| chr10 | 59629124 | 59629280 |
| chr10 | 59642747 | 59642833 |
| chr10 | 59724830 | 59724920 |
| chr10 | 59951861 | 59951938 |
| chr10 | 59972556 | 59972751 |
| chr10 | 60162316 | 60162449 |
| chr10 | 60351971 | 60352078 |
| chr10 | 61475662 | 61475819 |
| chr10 | 62221266 | 62221360 |
| chr10 | 62221712 | 62221835 |
| chr10 | 62651290 | 62651386 |
| chr10 | 63024089 | 63024192 |
| chr10 | 66921239 | 66921484 |
| chr10 | 66928306 | 66928390 |
| chr10 | 67176162 | 67176265 |
| chr10 | 67288201 | 67288278 |
| chr10 | 67785690 | 67785834 |

|       |          |          |
|-------|----------|----------|
| chr10 | 68127695 | 68127832 |
| chr10 | 68999869 | 68999963 |
| chr10 | 69166064 | 69166152 |
| chr10 | 69652795 | 69652950 |
| chr10 | 69872518 | 69872742 |
| chr10 | 69910613 | 69910717 |
| chr10 | 70222364 | 70222450 |
| chr10 | 70288135 | 70288231 |
| chr10 | 72783447 | 72783591 |
| chr10 | 75129304 | 75129399 |
| chr10 | 75304867 | 75304981 |
| chr10 | 75517344 | 75517446 |
| chr10 | 75764301 | 75764409 |
| chr10 | 75773469 | 75773576 |
| chr10 | 75795088 | 75795193 |
| chr10 | 75836292 | 75836423 |
| chr10 | 75893167 | 75893396 |
| chr10 | 76537682 | 76537847 |
| chr10 | 76962047 | 76962172 |
| chr10 | 77570206 | 77570493 |
| chr10 | 77581575 | 77581726 |
| chr10 | 77804249 | 77804331 |
| chr10 | 78169898 | 78170003 |
| chr10 | 78575389 | 78575464 |
| chr10 | 79097615 | 79097689 |
| chr10 | 79681542 | 79681646 |
| chr10 | 79696270 | 79696518 |
| chr10 | 79767146 | 79767272 |
| chr10 | 79780269 | 79780701 |
| chr10 | 79822513 | 79822636 |
| chr10 | 79824538 | 79824685 |
| chr10 | 79908521 | 79908607 |
| chr10 | 79984946 | 79985158 |
| chr10 | 80033717 | 80033808 |
| chr10 | 80053464 | 80053565 |
| chr10 | 80115500 | 80115700 |
| chr10 | 80226363 | 80226467 |
| chr10 | 80260919 | 80261124 |
| chr10 | 80261332 | 80261462 |
| chr10 | 80261699 | 80261820 |
| chr10 | 80283268 | 80283377 |
| chr10 | 80329908 | 80330045 |
| chr10 | 80399594 | 80399746 |
| chr10 | 80434004 | 80434097 |
| chr10 | 80590565 | 80590701 |

|       |          |          |
|-------|----------|----------|
| chr10 | 80678159 | 80678280 |
| chr10 | 80701922 | 80702036 |
| chr10 | 80702120 | 80702306 |
| chr10 | 80742372 | 80742494 |
| chr10 | 80826343 | 80826553 |
| chr10 | 80900906 | 80901167 |
| chr10 | 81092622 | 81092793 |
| chr10 | 81167776 | 81167878 |
| chr10 | 81182590 | 81182959 |
| chr10 | 81286715 | 81286870 |
| chr10 | 81289913 | 81290006 |
| chr10 | 81320530 | 81320616 |
| chr10 | 81320699 | 81320918 |
| chr10 | 81350454 | 81350571 |
| chr10 | 81433042 | 81433155 |
| chr10 | 81496710 | 81496818 |
| chr10 | 81546499 | 81546660 |
| chr10 | 81606142 | 81606300 |
| chr10 | 82623323 | 82623577 |
| chr10 | 82697422 | 82697511 |
| chr10 | 82858920 | 82859179 |
| chr10 | 83645219 | 83645385 |
| chr10 | 84295692 | 84295769 |
| chr10 | 84917135 | 84917225 |
| chr10 | 85128057 | 85128165 |
| chr10 | 86342893 | 86343035 |
| chr10 | 86705567 | 86705774 |
| chr10 | 86778543 | 86778651 |
| chr10 | 89397983 | 89398078 |
| chr10 | 89527175 | 89527305 |
| chr10 | 89633897 | 89633988 |
| chr10 | 91062448 | 91062645 |
| chr10 | 91183368 | 91183600 |
| chr10 | 92388318 | 92388418 |
| chr10 | 92722594 | 92722679 |
| chr10 | 93188494 | 93188657 |
| chr10 | 93422146 | 93422331 |
| chr10 | 93422968 | 93423115 |
| chr10 | 94035879 | 94035969 |
| chr10 | 94082452 | 94082592 |
| chr10 | 94545778 | 94545903 |
| chr10 | 95281913 | 95282003 |
| chr10 | 95623323 | 95623479 |
| chr10 | 95864583 | 95864867 |
| chr10 | 96077617 | 96077730 |

|       |           |           |
|-------|-----------|-----------|
| chr10 | 96338017  | 96338347  |
| chr10 | 96804603  | 96804737  |
| chr10 | 98504738  | 98504823  |
| chr10 | 98695183  | 98695356  |
| chr10 | 99202449  | 99202556  |
| chr10 | 99466829  | 99466945  |
| chr10 | 100014220 | 100014483 |
| chr10 | 100043882 | 100044058 |
| chr10 | 100487282 | 100487459 |
| chr10 | 102659852 | 102659955 |
| chr10 | 103838799 | 103838968 |
| chr10 | 105523762 | 105523864 |
| chr10 | 107933673 | 107933754 |
| chr10 | 108329904 | 108330006 |
| chr10 | 108355140 | 108355303 |
| chr10 | 110600411 | 110600521 |
| chr10 | 111543975 | 111544091 |
| chr10 | 111559408 | 111559498 |
| chr10 | 111576091 | 111576372 |
| chr10 | 111739881 | 111740054 |
| chr10 | 111795926 | 111796059 |
| chr10 | 112163437 | 112163565 |
| chr10 | 115359212 | 115359351 |
| chr10 | 116192366 | 116192593 |
| chr10 | 117121485 | 117121718 |
| chr10 | 117292917 | 117293029 |
| chr10 | 117625718 | 117625958 |
| chr10 | 117792893 | 117793006 |
| chr10 | 117799865 | 117799941 |
| chr10 | 118141609 | 118141854 |
| chr10 | 118804613 | 118804825 |
| chr10 | 119024537 | 119024670 |
| chr10 | 119203548 | 119203622 |
| chr10 | 120581650 | 120581779 |
| chr10 | 120745218 | 120745351 |
| chr10 | 120915065 | 120915163 |
| chr10 | 120979393 | 120979487 |
| chr10 | 121455107 | 121455337 |
| chr10 | 121498681 | 121498784 |
| chr10 | 121521111 | 121521202 |
| chr10 | 121904206 | 121904323 |
| chr10 | 126977234 | 126977350 |
| chr10 | 127082352 | 127082463 |
| chr10 | 127138840 | 127138989 |
| chr10 | 127266283 | 127266360 |

|       |           |           |
|-------|-----------|-----------|
| chr10 | 127290616 | 127290717 |
| chr10 | 127603773 | 127603846 |
| chr10 | 127621672 | 127621865 |
| chr10 | 127738186 | 127738408 |
| chr10 | 127764036 | 127764197 |
| chr10 | 127949784 | 127949868 |
| chr10 | 128083008 | 128083193 |
| chr10 | 128270292 | 128270471 |
| chr10 | 128409836 | 128409961 |
| chr10 | 128493010 | 128493118 |
| chr10 | 128525979 | 128526074 |
| chr10 | 128547737 | 128547846 |
| chr10 | 128549192 | 128549308 |
| chr10 | 128566225 | 128566345 |
| chr10 | 128587843 | 128587927 |
| chr10 | 128696372 | 128696492 |
| chr10 | 128919218 | 128919324 |
| chr10 | 128961000 | 128961082 |
| chr10 | 128968409 | 128968497 |
| chr10 | 130594792 | 130594985 |
| chr11 | 3100441   | 3100515   |
| chr11 | 3127189   | 3127273   |
| chr11 | 3151498   | 3151586   |
| chr11 | 3153838   | 3153968   |
| chr11 | 3186767   | 3186940   |
| chr11 | 3391001   | 3391139   |
| chr11 | 3398474   | 3398703   |
| chr11 | 4093550   | 4093673   |
| chr11 | 4637661   | 4637745   |
| chr11 | 4849531   | 4849665   |
| chr11 | 5499362   | 5499604   |
| chr11 | 6444426   | 6444505   |
| chr11 | 6937330   | 6937405   |
| chr11 | 7160850   | 7160962   |
| chr11 | 7197519   | 7197681   |
| chr11 | 8472580   | 8472671   |
| chr11 | 8510468   | 8510543   |
| chr11 | 8569334   | 8569505   |
| chr11 | 8583332   | 8583441   |
| chr11 | 8664051   | 8664154   |
| chr11 | 9048523   | 9048683   |
| chr11 | 11013148  | 11013394  |
| chr11 | 12409700  | 12409792  |
| chr11 | 12411567  | 12411675  |
| chr11 | 16591595  | 16591675  |

|       |          |          |
|-------|----------|----------|
| chr11 | 16770120 | 16770243 |
| chr11 | 16800735 | 16800909 |
| chr11 | 16907840 | 16907974 |
| chr11 | 16951145 | 16951259 |
| chr11 | 18927523 | 18927688 |
| chr11 | 19849711 | 19849810 |
| chr11 | 19912266 | 19912499 |
| chr11 | 19941240 | 19941402 |
| chr11 | 19979471 | 19979631 |
| chr11 | 20201090 | 20201272 |
| chr11 | 20249470 | 20249562 |
| chr11 | 20332842 | 20332942 |
| chr11 | 20333240 | 20333350 |
| chr11 | 20357882 | 20358025 |
| chr11 | 20542896 | 20543066 |
| chr11 | 20887108 | 20887186 |
| chr11 | 21091216 | 21091309 |
| chr11 | 21572066 | 21572146 |
| chr11 | 22287285 | 22287403 |
| chr11 | 22437589 | 22437703 |
| chr11 | 22437959 | 22438083 |
| chr11 | 23052438 | 23052538 |
| chr11 | 23255569 | 23255660 |
| chr11 | 23498142 | 23498216 |
| chr11 | 24308000 | 24308216 |
| chr11 | 29638174 | 29638294 |
| chr11 | 29692730 | 29692852 |
| chr11 | 29867026 | 29867170 |
| chr11 | 30026044 | 30026191 |
| chr11 | 30210334 | 30210413 |
| chr11 | 31824951 | 31825136 |
| chr11 | 31922682 | 31922785 |
| chr11 | 32205297 | 32205379 |
| chr11 | 32346023 | 32346185 |
| chr11 | 33754933 | 33755007 |
| chr11 | 34681825 | 34681926 |
| chr11 | 35925794 | 35925905 |
| chr11 | 35945458 | 35945535 |
| chr11 | 35963664 | 35963855 |
| chr11 | 35970801 | 35970960 |
| chr11 | 35971135 | 35971290 |
| chr11 | 40733474 | 40733602 |
| chr11 | 40755312 | 40755489 |
| chr11 | 41340577 | 41340664 |
| chr11 | 43549850 | 43549925 |



|       |          |          |
|-------|----------|----------|
| chr11 | 43626289 | 43626436 |
| chr11 | 43681694 | 43681859 |
| chr11 | 43997719 | 43997802 |
| chr11 | 44002013 | 44002087 |
| chr11 | 44453710 | 44453787 |
| chr11 | 44470487 | 44470761 |
| chr11 | 45805428 | 45805552 |
| chr11 | 45838695 | 45838805 |
| chr11 | 45855884 | 45855977 |
| chr11 | 49244288 | 49244372 |
| chr11 | 50292452 | 50292530 |
| chr11 | 50440003 | 50440109 |
| chr11 | 51584508 | 51584738 |
| chr11 | 51619635 | 51619789 |
| chr11 | 51739136 | 51739346 |
| chr11 | 51877017 | 51877182 |
| chr11 | 51916570 | 51916726 |
| chr11 | 52224330 | 52224647 |
| chr11 | 52257543 | 52257650 |
| chr11 | 53308392 | 53308546 |
| chr11 | 53327226 | 53327365 |
| chr11 | 53430996 | 53431236 |
| chr11 | 53840225 | 53840376 |
| chr11 | 53891865 | 53892005 |
| chr11 | 54004340 | 54004433 |
| chr11 | 54033043 | 54033170 |
| chr11 | 54060619 | 54060725 |
| chr11 | 54140097 | 54140287 |
| chr11 | 54140519 | 54140676 |
| chr11 | 54811269 | 54811352 |
| chr11 | 54860612 | 54860805 |
| chr11 | 54867124 | 54867199 |
| chr11 | 54936511 | 54936716 |
| chr11 | 54973804 | 54973975 |
| chr11 | 55027768 | 55027854 |
| chr11 | 55097723 | 55097932 |
| chr11 | 55461233 | 55461453 |
| chr11 | 55469348 | 55469569 |
| chr11 | 57176108 | 57176185 |
| chr11 | 57711957 | 57712064 |
| chr11 | 57719730 | 57719873 |
| chr11 | 57999036 | 57999202 |
| chr11 | 58323345 | 58323477 |
| chr11 | 58604733 | 58604913 |
| chr11 | 58618511 | 58618610 |

|       |          |          |
|-------|----------|----------|
| chr11 | 59459136 | 59459215 |
| chr11 | 60339570 | 60339666 |
| chr11 | 60352954 | 60353293 |
| chr11 | 60825281 | 60825409 |
| chr11 | 60935394 | 60935478 |
| chr11 | 61175148 | 61175321 |
| chr11 | 61266634 | 61266766 |
| chr11 | 61700041 | 61700222 |
| chr11 | 62050767 | 62050942 |
| chr11 | 62076769 | 62076909 |
| chr11 | 62409688 | 62409837 |
| chr11 | 62814100 | 62814187 |
| chr11 | 62820109 | 62820198 |
| chr11 | 62827356 | 62827432 |
| chr11 | 63544134 | 63544254 |
| chr11 | 63922374 | 63922467 |
| chr11 | 64978882 | 64979023 |
| chr11 | 67020922 | 67021080 |
| chr11 | 67031396 | 67031585 |
| chr11 | 67496925 | 67497059 |
| chr11 | 67922160 | 67922349 |
| chr11 | 67925198 | 67925308 |
| chr11 | 69095002 | 69095200 |
| chr11 | 69401415 | 69401541 |
| chr11 | 69411299 | 69411376 |
| chr11 | 69418939 | 69419161 |
| chr11 | 69581462 | 69581548 |
| chr11 | 69632615 | 69632813 |
| chr11 | 69672398 | 69672653 |
| chr11 | 69795309 | 69795495 |
| chr11 | 69838066 | 69838230 |
| chr11 | 69838324 | 69838498 |
| chr11 | 69846434 | 69846556 |
| chr11 | 69921337 | 69921476 |
| chr11 | 69980638 | 69980780 |
| chr11 | 70173769 | 70173876 |
| chr11 | 70222000 | 70222087 |
| chr11 | 70284775 | 70285007 |
| chr11 | 70432299 | 70432414 |
| chr11 | 70668742 | 70668936 |
| chr11 | 70874346 | 70874445 |
| chr11 | 70969987 | 70970100 |
| chr11 | 70979464 | 70979543 |
| chr11 | 71019317 | 71019618 |
| chr11 | 71996064 | 71996156 |

|       |          |          |
|-------|----------|----------|
| chr11 | 72011156 | 72011243 |
| chr11 | 72065055 | 72065158 |
| chr11 | 72215146 | 72215219 |
| chr11 | 72435162 | 72435258 |
| chr11 | 72504512 | 72504746 |
| chr11 | 72607129 | 72607265 |
| chr11 | 72808111 | 72808302 |
| chr11 | 73199358 | 73199449 |
| chr11 | 73318546 | 73318846 |
| chr11 | 74183808 | 74183895 |
| chr11 | 74448302 | 74448434 |
| chr11 | 74954919 | 74955011 |
| chr11 | 75247284 | 75247373 |
| chr11 | 75461291 | 75461495 |
| chr11 | 75470756 | 75470844 |
| chr11 | 75569079 | 75569199 |
| chr11 | 75630814 | 75630939 |
| chr11 | 76011401 | 76011475 |
| chr11 | 76177194 | 76177282 |
| chr11 | 76217648 | 76217750 |
| chr11 | 76847054 | 76847186 |
| chr11 | 77199645 | 77199727 |
| chr11 | 77685940 | 77686037 |
| chr11 | 77786005 | 77786236 |
| chr11 | 77894064 | 77894191 |
| chr11 | 77982520 | 77982630 |
| chr11 | 78115436 | 78115522 |
| chr11 | 78322927 | 78323007 |
| chr11 | 78328331 | 78328424 |
| chr11 | 78370503 | 78370622 |
| chr11 | 78552561 | 78552717 |
| chr11 | 78697485 | 78697559 |
| chr11 | 78697829 | 78698013 |
| chr11 | 78982074 | 78982202 |
| chr11 | 79112627 | 79112846 |
| chr11 | 79146393 | 79146500 |
| chr11 | 79771615 | 79771782 |
| chr11 | 79790204 | 79790509 |
| chr11 | 80085409 | 80085561 |
| chr11 | 80146164 | 80146268 |
| chr11 | 80784398 | 80784553 |
| chr11 | 80808739 | 80808851 |
| chr11 | 80820107 | 80820445 |
| chr11 | 82764226 | 82764344 |
| chr11 | 83303920 | 83303993 |

|       |          |          |
|-------|----------|----------|
| chr11 | 83843636 | 83843742 |
| chr11 | 83882876 | 83883008 |
| chr11 | 84442546 | 84442624 |
| chr11 | 85695723 | 85695833 |
| chr11 | 86201112 | 86201281 |
| chr11 | 86211970 | 86212043 |
| chr11 | 86397142 | 86397253 |
| chr11 | 86484380 | 86484601 |
| chr11 | 86580465 | 86580748 |
| chr11 | 86587109 | 86587285 |
| chr11 | 86593241 | 86593328 |
| chr11 | 86624396 | 86624470 |
| chr11 | 86646680 | 86646764 |
| chr11 | 86953315 | 86953421 |
| chr11 | 86961987 | 86962162 |
| chr11 | 87007504 | 87007643 |
| chr11 | 87108937 | 87109060 |
| chr11 | 87109136 | 87109255 |
| chr11 | 87591836 | 87592123 |
| chr11 | 87697264 | 87697427 |
| chr11 | 88404232 | 88404456 |
| chr11 | 88613240 | 88613448 |
| chr11 | 88620276 | 88620374 |
| chr11 | 88955485 | 88955594 |
| chr11 | 89024322 | 89024470 |
| chr11 | 91005675 | 91005751 |
| chr11 | 94160529 | 94160668 |
| chr11 | 94161434 | 94161560 |
| chr11 | 94193364 | 94193443 |
| chr11 | 94226126 | 94226221 |
| chr11 | 94404376 | 94404499 |
| chr11 | 95041406 | 95041505 |
| chr11 | 95074815 | 95074933 |
| chr11 | 95189918 | 95190110 |
| chr11 | 95310233 | 95310462 |
| chr11 | 95336849 | 95336936 |
| chr11 | 95666832 | 95666907 |
| chr11 | 95858703 | 95858937 |
| chr11 | 96018107 | 96018192 |
| chr11 | 96075673 | 96076031 |
| chr11 | 96830098 | 96830195 |
| chr11 | 96943980 | 96944159 |
| chr11 | 96977763 | 96978052 |
| chr11 | 97188016 | 97188245 |
| chr11 | 97315478 | 97315569 |

|       |           |           |
|-------|-----------|-----------|
| chr11 | 97662418  | 97662548  |
| chr11 | 97812255  | 97812339  |
| chr11 | 97820986  | 97821064  |
| chr11 | 97850538  | 97850640  |
| chr11 | 98193387  | 98193462  |
| chr11 | 98348633  | 98348728  |
| chr11 | 98395287  | 98395437  |
| chr11 | 98653121  | 98653203  |
| chr11 | 98682326  | 98682404  |
| chr11 | 98709340  | 98709431  |
| chr11 | 98775462  | 98775547  |
| chr11 | 98935175  | 98935421  |
| chr11 | 99076760  | 99076861  |
| chr11 | 99077069  | 99077153  |
| chr11 | 99089340  | 99089435  |
| chr11 | 99095074  | 99095159  |
| chr11 | 99104851  | 99105016  |
| chr11 | 99113221  | 99113322  |
| chr11 | 99489020  | 99489145  |
| chr11 | 99489374  | 99489507  |
| chr11 | 99496557  | 99496781  |
| chr11 | 100146073 | 100146244 |
| chr11 | 100158157 | 100158450 |
| chr11 | 100287123 | 100287215 |
| chr11 | 100288937 | 100289108 |
| chr11 | 100319825 | 100319906 |
| chr11 | 100397251 | 100397327 |
| chr11 | 100397783 | 100397994 |
| chr11 | 100518337 | 100518583 |
| chr11 | 100939541 | 100939717 |
| chr11 | 100979986 | 100980152 |
| chr11 | 101278023 | 101278109 |
| chr11 | 101551964 | 101552083 |
| chr11 | 101552622 | 101552708 |
| chr11 | 101620214 | 101620345 |
| chr11 | 101658618 | 101658709 |
| chr11 | 101984259 | 101984353 |
| chr11 | 102216630 | 102216782 |
| chr11 | 102297091 | 102297166 |
| chr11 | 102375961 | 102376041 |
| chr11 | 102643938 | 102644017 |
| chr11 | 103028241 | 103028457 |
| chr11 | 103115961 | 103116075 |
| chr11 | 103132981 | 103133058 |
| chr11 | 103221576 | 103221698 |

|       |           |           |
|-------|-----------|-----------|
| chr11 | 103241309 | 103241390 |
| chr11 | 103267483 | 103267744 |
| chr11 | 103340756 | 103340942 |
| chr11 | 103412706 | 103412807 |
| chr11 | 103961460 | 103961691 |
| chr11 | 103966402 | 103966657 |
| chr11 | 104289245 | 104289394 |
| chr11 | 104316874 | 104316958 |
| chr11 | 105375748 | 105375831 |
| chr11 | 106084209 | 106084472 |
| chr11 | 106216415 | 106216630 |
| chr11 | 106462388 | 106462463 |
| chr11 | 106812497 | 106812652 |
| chr11 | 107022414 | 107022534 |
| chr11 | 107287667 | 107287756 |
| chr11 | 107341393 | 107341477 |
| chr11 | 107457380 | 107457524 |
| chr11 | 107546212 | 107546287 |
| chr11 | 107574147 | 107574226 |
| chr11 | 109011646 | 109012115 |
| chr11 | 109350005 | 109350176 |
| chr11 | 109425842 | 109425987 |
| chr11 | 109496259 | 109496376 |
| chr11 | 109554563 | 109554675 |
| chr11 | 109556215 | 109556355 |
| chr11 | 109611563 | 109611814 |
| chr11 | 110011021 | 110011103 |
| chr11 | 110244859 | 110244975 |
| chr11 | 110380081 | 110380276 |
| chr11 | 110479091 | 110479246 |
| chr11 | 110544613 | 110544895 |
| chr11 | 112910446 | 112910686 |
| chr11 | 113052605 | 113052693 |
| chr11 | 113061112 | 113061299 |
| chr11 | 113093980 | 113094165 |
| chr11 | 113101684 | 113101771 |
| chr11 | 113138615 | 113138698 |
| chr11 | 113260163 | 113260422 |
| chr11 | 113292434 | 113292578 |
| chr11 | 113569170 | 113569311 |
| chr11 | 113667315 | 113667453 |
| chr11 | 113749812 | 113749921 |
| chr11 | 113817399 | 113817482 |
| chr11 | 114676608 | 114676742 |
| chr11 | 115219357 | 115219431 |

|       |           |           |
|-------|-----------|-----------|
| chr11 | 115277030 | 115277319 |
| chr11 | 115450262 | 115450480 |
| chr11 | 115753558 | 115753635 |
| chr11 | 115779181 | 115779413 |
| chr11 | 115823827 | 115824000 |
| chr11 | 115843878 | 115844005 |
| chr11 | 115877296 | 115877598 |
| chr11 | 115884460 | 115884688 |
| chr11 | 115956607 | 115956704 |
| chr11 | 116138946 | 116139058 |
| chr11 | 116146283 | 116146360 |
| chr11 | 116195395 | 116195547 |
| chr11 | 116210924 | 116211007 |
| chr11 | 116218908 | 116219111 |
| chr11 | 116389347 | 116389459 |
| chr11 | 116571850 | 116571997 |
| chr11 | 116658018 | 116658120 |
| chr11 | 116808239 | 116808354 |
| chr11 | 116818749 | 116818945 |
| chr11 | 116843409 | 116843502 |
| chr11 | 117154113 | 117154317 |
| chr11 | 117177758 | 117177846 |
| chr11 | 117256284 | 117256373 |
| chr11 | 117568476 | 117568866 |
| chr11 | 117654578 | 117654668 |
| chr11 | 117790758 | 117790832 |
| chr11 | 117810544 | 117810631 |
| chr11 | 118248668 | 118248778 |
| chr11 | 118290207 | 118290330 |
| chr11 | 119041034 | 119041114 |
| chr11 | 119052796 | 119052872 |
| chr11 | 119091879 | 119091996 |
| chr11 | 119126589 | 119126712 |
| chr11 | 119134568 | 119134802 |
| chr11 | 119314706 | 119314801 |
| chr11 | 119489646 | 119489732 |
| chr11 | 119758328 | 119758425 |
| chr11 | 119916242 | 119916374 |
| chr11 | 119945531 | 119945779 |
| chr11 | 119955078 | 119955229 |
| chr11 | 120086852 | 120087001 |
| chr11 | 120200799 | 120200904 |
| chr11 | 120232727 | 120232901 |
| chr11 | 120340286 | 120340504 |
| chr11 | 120467485 | 120467575 |

|       |           |           |
|-------|-----------|-----------|
| chr11 | 120489523 | 120489605 |
| chr11 | 120727279 | 120727367 |
| chr11 | 120914978 | 120915101 |
| chr11 | 121085274 | 121085520 |
| chr11 | 121086497 | 121086586 |
| chr11 | 121204152 | 121204295 |
| chr11 | 121237068 | 121237242 |
| chr11 | 121388309 | 121388486 |
| chr11 | 121517013 | 121517240 |
| chr11 | 121673092 | 121673266 |
| chr11 | 121982373 | 121982529 |
| chr12 | 3109871   | 3110112   |
| chr12 | 4469199   | 4469337   |
| chr12 | 4817314   | 4817415   |
| chr12 | 4843274   | 4843424   |
| chr12 | 5213624   | 5213730   |
| chr12 | 7636718   | 7636952   |
| chr12 | 7820465   | 7820672   |
| chr12 | 7977533   | 7977677   |
| chr12 | 8379829   | 8380124   |
| chr12 | 8877022   | 8877117   |
| chr12 | 8882455   | 8882569   |
| chr12 | 8954473   | 8954549   |
| chr12 | 10583281  | 10583507  |
| chr12 | 12306446  | 12306558  |
| chr12 | 12509411  | 12509647  |
| chr12 | 12530888  | 12531046  |
| chr12 | 12541609  | 12541928  |
| chr12 | 12811025  | 12811166  |
| chr12 | 13218299  | 13218474  |
| chr12 | 13809535  | 13809610  |
| chr12 | 14308924  | 14309000  |
| chr12 | 15319793  | 15319967  |
| chr12 | 16619040  | 16619114  |
| chr12 | 16726415  | 16726506  |
| chr12 | 16747816  | 16747913  |
| chr12 | 16841151  | 16841368  |
| chr12 | 17881745  | 17881834  |
| chr12 | 21286265  | 21286370  |
| chr12 | 24463713  | 24463797  |
| chr12 | 24572149  | 24572254  |
| chr12 | 24724441  | 24724601  |
| chr12 | 24734989  | 24735063  |
| chr12 | 24894134  | 24894357  |
| chr12 | 24928397  | 24928514  |



|       |          |          |
|-------|----------|----------|
| chr12 | 25169657 | 25169889 |
| chr12 | 25181447 | 25181609 |
| chr12 | 25233130 | 25233278 |
| chr12 | 31080476 | 31080640 |
| chr12 | 31256579 | 31256722 |
| chr12 | 31950373 | 31950723 |
| chr12 | 32451395 | 32451474 |
| chr12 | 32936776 | 32936865 |
| chr12 | 32953897 | 32954124 |
| chr12 | 35376498 | 35376822 |
| chr12 | 35827215 | 35827403 |
| chr12 | 35932985 | 35933195 |
| chr12 | 35979659 | 35979752 |
| chr12 | 36042571 | 36042659 |
| chr12 | 39560233 | 39560406 |
| chr12 | 39950351 | 39950598 |
| chr12 | 40016944 | 40017057 |
| chr12 | 40037436 | 40037607 |
| chr12 | 40223303 | 40223450 |
| chr12 | 40335423 | 40335584 |
| chr12 | 41081932 | 41082015 |
| chr12 | 41417216 | 41417419 |
| chr12 | 41948231 | 41948394 |
| chr12 | 44268970 | 44269066 |
| chr12 | 45067215 | 45067310 |
| chr12 | 51756507 | 51756630 |
| chr12 | 51845135 | 51845219 |
| chr12 | 52400061 | 52400422 |
| chr12 | 52448249 | 52448428 |
| chr12 | 52573471 | 52573690 |
| chr12 | 52595497 | 52595734 |
| chr12 | 52692435 | 52692539 |
| chr12 | 54252442 | 54252593 |
| chr12 | 54313134 | 54313258 |
| chr12 | 54334945 | 54335078 |
| chr12 | 54493425 | 54493591 |
| chr12 | 54697095 | 54697186 |
| chr12 | 54710507 | 54710810 |
| chr12 | 54738257 | 54738364 |
| chr12 | 54834970 | 54835072 |
| chr12 | 55471462 | 55471578 |
| chr12 | 56144470 | 56144569 |
| chr12 | 57890943 | 57891060 |
| chr12 | 59011850 | 59012000 |
| chr12 | 59093721 | 59093853 |

|       |          |          |
|-------|----------|----------|
| chr12 | 64965561 | 64965641 |
| chr12 | 67059338 | 67059624 |
| chr12 | 67343524 | 67343601 |
| chr12 | 69176162 | 69176247 |
| chr12 | 69367676 | 69367911 |
| chr12 | 69386055 | 69386163 |
| chr12 | 69416962 | 69417200 |
| chr12 | 69451172 | 69451361 |
| chr12 | 69537479 | 69537599 |
| chr12 | 69654112 | 69654258 |
| chr12 | 70731578 | 70731877 |
| chr12 | 70769743 | 70769889 |
| chr12 | 71015734 | 71015816 |
| chr12 | 71830944 | 71831109 |
| chr12 | 71936690 | 71936842 |
| chr12 | 72085566 | 72085826 |
| chr12 | 72393555 | 72393646 |
| chr12 | 74075783 | 74075900 |
| chr12 | 74087158 | 74087355 |
| chr12 | 74804264 | 74804502 |
| chr12 | 75486990 | 75487112 |
| chr12 | 75559359 | 75559485 |
| chr12 | 75596222 | 75596301 |
| chr12 | 75669567 | 75669784 |
| chr12 | 76131119 | 76131193 |
| chr12 | 76404042 | 76404349 |
| chr12 | 76459097 | 76459322 |
| chr12 | 76558294 | 76558464 |
| chr12 | 76798531 | 76798755 |
| chr12 | 78350915 | 78351171 |
| chr12 | 78748759 | 78748849 |
| chr12 | 78890251 | 78890329 |
| chr12 | 79504213 | 79504321 |
| chr12 | 79532164 | 79532242 |
| chr12 | 79674790 | 79675241 |
| chr12 | 79936705 | 79936935 |
| chr12 | 79970020 | 79970107 |
| chr12 | 80103784 | 80103926 |
| chr12 | 80277633 | 80277715 |
| chr12 | 80329798 | 80329896 |
| chr12 | 80379858 | 80380015 |
| chr12 | 80615852 | 80616075 |
| chr12 | 80832545 | 80832639 |
| chr12 | 80834267 | 80834391 |
| chr12 | 81698259 | 81698332 |

|       |           |           |
|-------|-----------|-----------|
| chr12 | 82086271  | 82086368  |
| chr12 | 82145321  | 82145402  |
| chr12 | 83579213  | 83579337  |
| chr12 | 83631993  | 83632115  |
| chr12 | 83922004  | 83922138  |
| chr12 | 83999397  | 83999499  |
| chr12 | 84009384  | 84009523  |
| chr12 | 84023486  | 84023647  |
| chr12 | 84285219  | 84285314  |
| chr12 | 84361842  | 84362002  |
| chr12 | 84384865  | 84385086  |
| chr12 | 84451068  | 84451436  |
| chr12 | 84772976  | 84773142  |
| chr12 | 84805654  | 84805798  |
| chr12 | 85219363  | 85219462  |
| chr12 | 85389296  | 85389392  |
| chr12 | 85449661  | 85449845  |
| chr12 | 85569812  | 85569898  |
| chr12 | 85824532  | 85824659  |
| chr12 | 86436032  | 86436115  |
| chr12 | 86879586  | 86879716  |
| chr12 | 87388394  | 87388681  |
| chr12 | 89742454  | 89742565  |
| chr12 | 89742842  | 89743078  |
| chr12 | 91557718  | 91557845  |
| chr12 | 91590650  | 91590726  |
| chr12 | 91668600  | 91668768  |
| chr12 | 91696383  | 91696563  |
| chr12 | 91849210  | 91849343  |
| chr12 | 93577066  | 93577144  |
| chr12 | 97061435  | 97061788  |
| chr12 | 99097280  | 99097530  |
| chr12 | 99097843  | 99097979  |
| chr12 | 100143277 | 100143358 |
| chr12 | 100281391 | 100281772 |
| chr12 | 100725160 | 100725467 |
| chr12 | 100863210 | 100863340 |
| chr12 | 101018892 | 101018972 |
| chr12 | 101083773 | 101083847 |
| chr12 | 101680720 | 101680913 |
| chr12 | 101758869 | 101758967 |
| chr12 | 101913170 | 101913271 |
| chr12 | 102439743 | 102439816 |
| chr12 | 103282049 | 103282195 |
| chr12 | 103425889 | 103426051 |

|       |           |           |
|-------|-----------|-----------|
| chr12 | 103457171 | 103457345 |
| chr12 | 104948052 | 104948125 |
| chr12 | 105032442 | 105032604 |
| chr12 | 105524741 | 105524823 |
| chr12 | 105753878 | 105754011 |
| chr12 | 106010175 | 106010260 |
| chr12 | 108179375 | 108179681 |
| chr12 | 108233968 | 108234043 |
| chr12 | 108689313 | 108689615 |
| chr12 | 108699726 | 108699815 |
| chr12 | 108702327 | 108702416 |
| chr12 | 108711029 | 108711106 |
| chr12 | 108765962 | 108766046 |
| chr12 | 108887080 | 108887170 |
| chr12 | 109856988 | 109857079 |
| chr12 | 110442352 | 110442513 |
| chr12 | 111353449 | 111353609 |
| chr12 | 111675863 | 111676056 |
| chr12 | 111813907 | 111814091 |
| chr12 | 112082415 | 112082532 |
| chr12 | 112126113 | 112126207 |
| chr12 | 112130189 | 112130342 |
| chr12 | 112644708 | 112644839 |
| chr12 | 113018191 | 113018285 |
| chr12 | 113156150 | 113156424 |
| chr12 | 116275636 | 116275741 |
| chr12 | 116585223 | 116585300 |
| chr12 | 116772287 | 116772492 |
| chr12 | 117450379 | 117450482 |
| chr12 | 120028684 | 120029022 |
| chr13 | 3086653   | 3086814   |
| chr13 | 3362469   | 3362629   |
| chr13 | 3372937   | 3373338   |
| chr13 | 3373460   | 3373689   |
| chr13 | 3645973   | 3646216   |
| chr13 | 3695063   | 3695158   |
| chr13 | 3710105   | 3710258   |
| chr13 | 3744078   | 3744309   |
| chr13 | 4233585   | 4233749   |
| chr13 | 4771540   | 4771748   |
| chr13 | 5566295   | 5566370   |
| chr13 | 5803774   | 5804064   |
| chr13 | 5837504   | 5837640   |
| chr13 | 5861310   | 5861396   |
| chr13 | 6236656   | 6236810   |

|       |          |          |
|-------|----------|----------|
| chr13 | 7313590  | 7313694  |
| chr13 | 9014660  | 9014847  |
| chr13 | 9022576  | 9022836  |
| chr13 | 9076016  | 9076138  |
| chr13 | 9093696  | 9093823  |
| chr13 | 9152348  | 9152547  |
| chr13 | 9834313  | 9834499  |
| chr13 | 10454760 | 10454873 |
| chr13 | 11549318 | 11549453 |
| chr13 | 12258205 | 12258291 |
| chr13 | 12395073 | 12395218 |
| chr13 | 12544327 | 12544442 |
| chr13 | 13093725 | 13093861 |
| chr13 | 14063426 | 14063723 |
| chr13 | 16715691 | 16715791 |
| chr13 | 17976032 | 17976106 |
| chr13 | 19882968 | 19883088 |
| chr13 | 20163404 | 20163577 |
| chr13 | 21177778 | 21177851 |
| chr13 | 21263188 | 21263267 |
| chr13 | 21350673 | 21350817 |
| chr13 | 22315429 | 22315518 |
| chr13 | 23683990 | 23684119 |
| chr13 | 23746495 | 23746586 |
| chr13 | 23917818 | 23918007 |
| chr13 | 24566076 | 24566337 |
| chr13 | 24709826 | 24709914 |
| chr13 | 24735742 | 24735861 |
| chr13 | 24999678 | 24999821 |
| chr13 | 25686241 | 25686338 |
| chr13 | 25809047 | 25809176 |
| chr13 | 27996666 | 27996839 |
| chr13 | 29162927 | 29163080 |
| chr13 | 29163181 | 29163379 |
| chr13 | 29503015 | 29503147 |
| chr13 | 29986111 | 29986378 |
| chr13 | 30036697 | 30036814 |
| chr13 | 30109232 | 30109309 |
| chr13 | 30138119 | 30138200 |
| chr13 | 30195009 | 30195170 |
| chr13 | 31187326 | 31187477 |
| chr13 | 31309273 | 31309514 |
| chr13 | 31327616 | 31327742 |
| chr13 | 31439824 | 31440031 |
| chr13 | 31506785 | 31506860 |

|       |          |          |
|-------|----------|----------|
| chr13 | 31518580 | 31518868 |
| chr13 | 31547528 | 31547955 |
| chr13 | 31567733 | 31567933 |
| chr13 | 32318493 | 32318717 |
| chr13 | 32479132 | 32479386 |
| chr13 | 32849207 | 32849446 |
| chr13 | 34287722 | 34287866 |
| chr13 | 34299610 | 34299747 |
| chr13 | 34305086 | 34305175 |
| chr13 | 35395740 | 35395948 |
| chr13 | 37460585 | 37460725 |
| chr13 | 37467926 | 37468039 |
| chr13 | 37732385 | 37732592 |
| chr13 | 38089907 | 38090052 |
| chr13 | 38170968 | 38171144 |
| chr13 | 38201474 | 38201718 |
| chr13 | 38736504 | 38736685 |
| chr13 | 40841543 | 40841616 |
| chr13 | 40869268 | 40869448 |
| chr13 | 41235982 | 41236080 |
| chr13 | 41423852 | 41423932 |
| chr13 | 41458766 | 41459070 |
| chr13 | 41785309 | 41785516 |
| chr13 | 41828425 | 41828717 |
| chr13 | 42254037 | 42254119 |
| chr13 | 42301291 | 42301485 |
| chr13 | 42342241 | 42342413 |
| chr13 | 43232103 | 43232181 |
| chr13 | 43304283 | 43304456 |
| chr13 | 43531528 | 43531662 |
| chr13 | 43991849 | 43991928 |
| chr13 | 44702032 | 44702165 |
| chr13 | 44869569 | 44869684 |
| chr13 | 44869903 | 44870018 |
| chr13 | 45903982 | 45904118 |
| chr13 | 46043646 | 46043822 |
| chr13 | 46269038 | 46269126 |
| chr13 | 46652907 | 46652999 |
| chr13 | 46925936 | 46926127 |
| chr13 | 47043173 | 47043368 |
| chr13 | 47217245 | 47217388 |
| chr13 | 48116001 | 48116077 |
| chr13 | 48782909 | 48782992 |
| chr13 | 48842005 | 48842112 |
| chr13 | 48853615 | 48853706 |

|       |          |          |
|-------|----------|----------|
| chr13 | 48962554 | 48962798 |
| chr13 | 48979177 | 48979254 |
| chr13 | 49140721 | 49140820 |
| chr13 | 49213665 | 49213824 |
| chr13 | 49249906 | 49250014 |
| chr13 | 49298814 | 49298993 |
| chr13 | 49341407 | 49341480 |
| chr13 | 51153101 | 51153347 |
| chr13 | 51645135 | 51645211 |
| chr13 | 52013780 | 52014044 |
| chr13 | 52037357 | 52037453 |
| chr13 | 52205310 | 52205575 |
| chr13 | 52339396 | 52339561 |
| chr13 | 52974802 | 52974883 |
| chr13 | 53188955 | 53189057 |
| chr13 | 53269906 | 53269990 |
| chr13 | 53919982 | 53920128 |
| chr13 | 54425394 | 54425540 |
| chr13 | 54440031 | 54440104 |
| chr13 | 55445144 | 55445269 |
| chr13 | 55536566 | 55536694 |
| chr13 | 56522329 | 56522491 |
| chr13 | 56561194 | 56561384 |
| chr13 | 56678259 | 56678382 |
| chr13 | 56747776 | 56747878 |
| chr13 | 58214413 | 58214623 |
| chr13 | 59668859 | 59669086 |
| chr13 | 59825949 | 59826051 |
| chr13 | 59826143 | 59826217 |
| chr13 | 60110642 | 60110790 |
| chr13 | 60319447 | 60319587 |
| chr13 | 62858399 | 62858649 |
| chr13 | 63187229 | 63187328 |
| chr13 | 63272747 | 63272896 |
| chr13 | 64105784 | 64105957 |
| chr13 | 64123834 | 64124055 |
| chr13 | 64153290 | 64153419 |
| chr13 | 64388430 | 64388591 |
| chr13 | 64422135 | 64422278 |
| chr13 | 64432412 | 64432516 |
| chr13 | 69029523 | 69029598 |
| chr13 | 69611517 | 69611729 |
| chr13 | 70848002 | 70848119 |
| chr13 | 73160437 | 73160514 |
| chr13 | 73290354 | 73290506 |

|       |          |          |
|-------|----------|----------|
| chr13 | 73714056 | 73714210 |
| chr13 | 73770098 | 73770174 |
| chr13 | 73971158 | 73971248 |
| chr13 | 74009205 | 74009369 |
| chr13 | 74071734 | 74071948 |
| chr13 | 74112285 | 74112374 |
| chr13 | 74530037 | 74530127 |
| chr13 | 74530499 | 74530600 |
| chr13 | 74770634 | 74770777 |
| chr13 | 75223982 | 75224093 |
| chr13 | 75226016 | 75226142 |
| chr13 | 75752634 | 75752714 |
| chr13 | 75797899 | 75797978 |
| chr13 | 75835601 | 75835815 |
| chr13 | 76256579 | 76256683 |
| chr13 | 77438908 | 77439050 |
| chr13 | 80957538 | 80957724 |
| chr13 | 85127132 | 85127207 |
| chr13 | 89949403 | 89949494 |
| chr13 | 91223778 | 91223853 |
| chr13 | 92073209 | 92073302 |
| chr13 | 92301908 | 92302015 |
| chr13 | 93793385 | 93793474 |
| chr13 | 94193333 | 94193415 |
| chr13 | 94193516 | 94193617 |
| chr13 | 94990668 | 94990926 |
| chr13 | 95113793 | 95113898 |
| chr13 | 95531922 | 95532008 |
| chr13 | 95554077 | 95554245 |
| chr13 | 95837036 | 95837123 |
| chr13 | 95924359 | 95924496 |
| chr13 | 96670889 | 96671001 |
| chr13 | 97190550 | 97190631 |
| chr13 | 97299989 | 97300180 |
| chr13 | 97300318 | 97300401 |
| chr13 | 97443780 | 97444115 |
| chr13 | 97651882 | 97651985 |
| chr13 | 97976779 | 97976938 |
| chr13 | 98164901 | 98165257 |
| chr13 | 98263017 | 98263093 |
| chr13 | 98495868 | 98495950 |
| chr13 | 98623280 | 98623367 |
| chr13 | 98715577 | 98715669 |
| chr13 | 98744864 | 98744978 |
| chr13 | 98819246 | 98819351 |



|       |           |           |
|-------|-----------|-----------|
| chr13 | 98871394  | 98871499  |
| chr13 | 98942133  | 98942246  |
| chr13 | 99150795  | 99150870  |
| chr13 | 99790926  | 99791033  |
| chr13 | 100015628 | 100015756 |
| chr13 | 100532887 | 100532992 |
| chr13 | 100533107 | 100533243 |
| chr13 | 100544366 | 100544617 |
| chr13 | 100989260 | 100989525 |
| chr13 | 101216539 | 101216685 |
| chr13 | 101764315 | 101764391 |
| chr13 | 101785042 | 101785191 |
| chr13 | 102569723 | 102569829 |
| chr13 | 103976302 | 103976385 |
| chr13 | 104023398 | 104023614 |
| chr13 | 104029236 | 104029365 |
| chr13 | 107711487 | 107711635 |
| chr13 | 107846739 | 107846834 |
| chr13 | 107873324 | 107873435 |
| chr13 | 107890150 | 107890268 |
| chr13 | 108216486 | 108216612 |
| chr13 | 108453571 | 108453797 |
| chr13 | 108536531 | 108536693 |
| chr13 | 108819858 | 108819977 |
| chr13 | 108820154 | 108820248 |
| chr13 | 109481631 | 109481735 |
| chr13 | 109502909 | 109503192 |
| chr13 | 109807682 | 109807802 |
| chr13 | 109837661 | 109837765 |
| chr13 | 109881310 | 109881545 |
| chr13 | 110609441 | 110609648 |
| chr13 | 111622582 | 111622815 |
| chr13 | 112375922 | 112376037 |
| chr13 | 112578180 | 112578307 |
| chr13 | 113518125 | 113518371 |
| chr13 | 114419429 | 114419674 |
| chr13 | 114734433 | 114734583 |
| chr13 | 115101848 | 115102014 |
| chr13 | 115125864 | 115125956 |
| chr13 | 116030299 | 116030415 |
| chr13 | 116192898 | 116192990 |
| chr13 | 119599016 | 119599149 |
| chr13 | 119690095 | 119690304 |
| chr13 | 120321441 | 120321639 |
| chr14 | 7826172   | 7826265   |

|       |          |          |
|-------|----------|----------|
| chr14 | 7954086  | 7954313  |
| chr14 | 8111642  | 8111864  |
| chr14 | 8146988  | 8147104  |
| chr14 | 8173021  | 8173131  |
| chr14 | 8258806  | 8258949  |
| chr14 | 8286653  | 8286822  |
| chr14 | 10658328 | 10658407 |
| chr14 | 11572511 | 11572673 |
| chr14 | 12073827 | 12073908 |
| chr14 | 12402406 | 12402498 |
| chr14 | 14596597 | 14596690 |
| chr14 | 14633300 | 14633375 |
| chr14 | 17918052 | 17918155 |
| chr14 | 18239106 | 18239347 |
| chr14 | 18271076 | 18271242 |
| chr14 | 19415719 | 19416003 |
| chr14 | 19416127 | 19416252 |
| chr14 | 19416912 | 19417056 |
| chr14 | 19417138 | 19417402 |
| chr14 | 19417484 | 19417650 |
| chr14 | 19417795 | 19417941 |
| chr14 | 19418144 | 19418295 |
| chr14 | 19418572 | 19418906 |
| chr14 | 19419187 | 19419402 |
| chr14 | 19707936 | 19708042 |
| chr14 | 20111036 | 20111168 |
| chr14 | 20478575 | 20478764 |
| chr14 | 20929076 | 20929358 |
| chr14 | 20964267 | 20964355 |
| chr14 | 20973892 | 20974087 |
| chr14 | 21455812 | 21455886 |
| chr14 | 21500478 | 21500861 |
| chr14 | 23114907 | 23115121 |
| chr14 | 24206820 | 24206898 |
| chr14 | 24779164 | 24779262 |
| chr14 | 25181424 | 25181562 |
| chr14 | 25318081 | 25318330 |
| chr14 | 25451211 | 25451297 |
| chr14 | 25466483 | 25466742 |
| chr14 | 25481339 | 25481531 |
| chr14 | 25493910 | 25494094 |
| chr14 | 25686394 | 25686535 |
| chr14 | 25857524 | 25857618 |
| chr14 | 26548034 | 26548355 |
| chr14 | 26578759 | 26578935 |

|       |          |          |
|-------|----------|----------|
| chr14 | 26637880 | 26638033 |
| chr14 | 27229471 | 27229573 |
| chr14 | 27295959 | 27296058 |
| chr14 | 27340916 | 27340990 |
| chr14 | 27350561 | 27350806 |
| chr14 | 27558941 | 27559077 |
| chr14 | 29968309 | 29968407 |
| chr14 | 30010074 | 30010158 |
| chr14 | 30628344 | 30628474 |
| chr14 | 30651126 | 30651291 |
| chr14 | 31930397 | 31930539 |
| chr14 | 32190778 | 32190860 |
| chr14 | 33335846 | 33336036 |
| chr14 | 37135360 | 37135466 |
| chr14 | 40927144 | 40927242 |
| chr14 | 40956569 | 40956663 |
| chr14 | 40967147 | 40967257 |
| chr14 | 40996299 | 40996442 |
| chr14 | 41017580 | 41017689 |
| chr14 | 45219466 | 45219543 |
| chr14 | 45983340 | 45983528 |
| chr14 | 46014301 | 46014451 |
| chr14 | 46760451 | 46760575 |
| chr14 | 47285409 | 47285520 |
| chr14 | 47354221 | 47354346 |
| chr14 | 47365038 | 47365118 |
| chr14 | 47489841 | 47489957 |
| chr14 | 47533704 | 47533803 |
| chr14 | 47629451 | 47629549 |
| chr14 | 47808567 | 47808676 |
| chr14 | 50813201 | 50813437 |
| chr14 | 50930923 | 50931020 |
| chr14 | 50948226 | 50948322 |
| chr14 | 51096094 | 51096272 |
| chr14 | 51884745 | 51884900 |
| chr14 | 52104179 | 52104294 |
| chr14 | 54233414 | 54233537 |
| chr14 | 54253954 | 54254149 |
| chr14 | 54410276 | 54410402 |
| chr14 | 54517421 | 54517607 |
| chr14 | 54572955 | 54573067 |
| chr14 | 54893669 | 54894028 |
| chr14 | 55015215 | 55015505 |
| chr14 | 55162230 | 55162547 |
| chr14 | 55279499 | 55279745 |

|       |          |          |
|-------|----------|----------|
| chr14 | 55560823 | 55560940 |
| chr14 | 55591603 | 55591742 |
| chr14 | 55617965 | 55618086 |
| chr14 | 55672148 | 55672256 |
| chr14 | 55715132 | 55715269 |
| chr14 | 55758372 | 55758527 |
| chr14 | 55882195 | 55882375 |
| chr14 | 56668155 | 56668240 |
| chr14 | 56693999 | 56694078 |
| chr14 | 57089166 | 57089523 |
| chr14 | 57398497 | 57398637 |
| chr14 | 58046830 | 58047154 |
| chr14 | 58282972 | 58283106 |
| chr14 | 58418983 | 58419123 |
| chr14 | 59533066 | 59533173 |
| chr14 | 59760130 | 59760393 |
| chr14 | 59843623 | 59843736 |
| chr14 | 60178712 | 60178891 |
| chr14 | 61560026 | 61560102 |
| chr14 | 62761276 | 62761359 |
| chr14 | 62837384 | 62837619 |
| chr14 | 63177942 | 63178084 |
| chr14 | 63245317 | 63245439 |
| chr14 | 63264792 | 63264885 |
| chr14 | 63325989 | 63326312 |
| chr14 | 63983170 | 63983255 |
| chr14 | 64633165 | 64633280 |
| chr14 | 65245519 | 65245662 |
| chr14 | 65636942 | 65637274 |
| chr14 | 65833995 | 65834093 |
| chr14 | 65878933 | 65879022 |
| chr14 | 65881573 | 65881661 |
| chr14 | 67176066 | 67176238 |
| chr14 | 67234487 | 67234565 |
| chr14 | 67715726 | 67716087 |
| chr14 | 67852858 | 67852989 |
| chr14 | 67973810 | 67973970 |
| chr14 | 68661537 | 68661617 |
| chr14 | 68688139 | 68688272 |
| chr14 | 69161992 | 69162093 |
| chr14 | 69816271 | 69816388 |
| chr14 | 70057823 | 70058005 |
| chr14 | 70102187 | 70102494 |
| chr14 | 70160886 | 70160995 |
| chr14 | 70354327 | 70354416 |

|       |           |           |
|-------|-----------|-----------|
| chr14 | 71461916  | 71461994  |
| chr14 | 73111073  | 73111168  |
| chr14 | 73253558  | 73253654  |
| chr14 | 73385625  | 73385766  |
| chr14 | 74732134  | 74732302  |
| chr14 | 75219560  | 75219775  |
| chr14 | 75832174  | 75832275  |
| chr14 | 76110791  | 76110925  |
| chr14 | 76223098  | 76223249  |
| chr14 | 76665226  | 76665351  |
| chr14 | 76681733  | 76681823  |
| chr14 | 76698944  | 76699166  |
| chr14 | 76733325  | 76733429  |
| chr14 | 76882710  | 76882807  |
| chr14 | 76951505  | 76951617  |
| chr14 | 79426410  | 79426493  |
| chr14 | 79515536  | 79515630  |
| chr14 | 86198995  | 86199139  |
| chr14 | 87141288  | 87141394  |
| chr14 | 90911189  | 90911275  |
| chr14 | 98085080  | 98085184  |
| chr14 | 99298477  | 99298573  |
| chr14 | 99548742  | 99548998  |
| chr14 | 99605775  | 99605976  |
| chr14 | 99624565  | 99624735  |
| chr14 | 99632621  | 99632745  |
| chr14 | 99646432  | 99646625  |
| chr14 | 99763483  | 99763585  |
| chr14 | 99771141  | 99771303  |
| chr14 | 99885309  | 99885410  |
| chr14 | 100412352 | 100412492 |
| chr14 | 100459049 | 100459295 |
| chr14 | 101788604 | 101788689 |
| chr14 | 101822486 | 101822590 |
| chr14 | 101840231 | 101840419 |
| chr14 | 101840532 | 101840687 |
| chr14 | 101853845 | 101854101 |
| chr14 | 104715790 | 104716059 |
| chr14 | 105263047 | 105263199 |
| chr14 | 105732487 | 105732761 |
| chr14 | 118369194 | 118369344 |
| chr14 | 118385760 | 118385835 |
| chr14 | 118566323 | 118566505 |
| chr14 | 118658520 | 118658601 |
| chr14 | 118678624 | 118678836 |

|       |           |           |
|-------|-----------|-----------|
| chr14 | 118735104 | 118735181 |
| chr14 | 118823444 | 118823577 |
| chr14 | 118937678 | 118937875 |
| chr14 | 120313247 | 120313360 |
| chr14 | 120338015 | 120338192 |
| chr14 | 120604009 | 120604208 |
| chr14 | 120626708 | 120626834 |
| chr14 | 120830489 | 120830636 |
| chr14 | 120832046 | 120832133 |
| chr14 | 121264421 | 121264589 |
| chr14 | 121298490 | 121298669 |
| chr14 | 121392028 | 121392156 |
| chr14 | 121435968 | 121436070 |
| chr14 | 121611238 | 121611481 |
| chr14 | 122568970 | 122569082 |
| chr14 | 123531189 | 123531264 |
| chr14 | 124801559 | 124802191 |
| chr15 | 3247583   | 3247698   |
| chr15 | 3248231   | 3248372   |
| chr15 | 5116516   | 5116616   |
| chr15 | 5195990   | 5196198   |
| chr15 | 6555695   | 6555865   |
| chr15 | 8446695   | 8446809   |
| chr15 | 8469097   | 8469363   |
| chr15 | 8569798   | 8569887   |
| chr15 | 9071139   | 9071213   |
| chr15 | 9435868   | 9436054   |
| chr15 | 10117198  | 10117312  |
| chr15 | 10485987  | 10486070  |
| chr15 | 10690325  | 10690471  |
| chr15 | 10834443  | 10834558  |
| chr15 | 12111374  | 12111539  |
| chr15 | 17769946  | 17770070  |
| chr15 | 25622425  | 25622504  |
| chr15 | 25637810  | 25638019  |
| chr15 | 25650626  | 25650700  |
| chr15 | 25663204  | 25663459  |
| chr15 | 25915285  | 25915492  |
| chr15 | 32023976  | 32024085  |
| chr15 | 32575306  | 32575481  |
| chr15 | 33513797  | 33513931  |
| chr15 | 34254344  | 34254795  |
| chr15 | 34350693  | 34350855  |
| chr15 | 34443259  | 34443339  |
| chr15 | 36348375  | 36348455  |

|       |          |          |
|-------|----------|----------|
| chr15 | 36580474 | 36580566 |
| chr15 | 36609095 | 36609176 |
| chr15 | 36794357 | 36794480 |
| chr15 | 36811283 | 36811434 |
| chr15 | 36881700 | 36881853 |
| chr15 | 36898863 | 36899110 |
| chr15 | 36960499 | 36960728 |
| chr15 | 36960840 | 36960929 |
| chr15 | 37135742 | 37135826 |
| chr15 | 37960966 | 37961087 |
| chr15 | 38300924 | 38301086 |
| chr15 | 38457272 | 38457597 |
| chr15 | 38461945 | 38462050 |
| chr15 | 38518122 | 38518312 |
| chr15 | 38927681 | 38927813 |
| chr15 | 40241906 | 40242035 |
| chr15 | 42607804 | 42607930 |
| chr15 | 44427926 | 44428114 |
| chr15 | 44618953 | 44619048 |
| chr15 | 47539996 | 47540131 |
| chr15 | 51854211 | 51854398 |
| chr15 | 54114404 | 54114656 |
| chr15 | 54534303 | 54534428 |
| chr15 | 54954104 | 54954280 |
| chr15 | 55112280 | 55112357 |
| chr15 | 55613756 | 55613845 |
| chr15 | 55878906 | 55878990 |
| chr15 | 56692293 | 56692366 |
| chr15 | 56765252 | 56765348 |
| chr15 | 57892462 | 57892671 |
| chr15 | 58076629 | 58076704 |
| chr15 | 58175579 | 58175805 |
| chr15 | 58761918 | 58762014 |
| chr15 | 58823701 | 58823776 |
| chr15 | 58933743 | 58933838 |
| chr15 | 59078002 | 59078144 |
| chr15 | 59092162 | 59092263 |
| chr15 | 59314873 | 59314968 |
| chr15 | 59439770 | 59439846 |
| chr15 | 59480754 | 59480887 |
| chr15 | 59511514 | 59511624 |
| chr15 | 59549724 | 59549799 |
| chr15 | 59787205 | 59787331 |
| chr15 | 61169130 | 61169298 |
| chr15 | 61446436 | 61446605 |

|       |          |          |
|-------|----------|----------|
| chr15 | 61450331 | 61450510 |
| chr15 | 61506432 | 61506861 |
| chr15 | 61532969 | 61533059 |
| chr15 | 61619033 | 61619284 |
| chr15 | 61797806 | 61798060 |
| chr15 | 62079582 | 62079695 |
| chr15 | 62712608 | 62712764 |
| chr15 | 63194180 | 63194482 |
| chr15 | 66847193 | 66847283 |
| chr15 | 67083228 | 67083395 |
| chr15 | 67315340 | 67315426 |
| chr15 | 68363496 | 68363581 |
| chr15 | 68972377 | 68972570 |
| chr15 | 71737879 | 71737994 |
| chr15 | 73061152 | 73061304 |
| chr15 | 73067402 | 73067486 |
| chr15 | 73118066 | 73118327 |
| chr15 | 73118733 | 73118940 |
| chr15 | 73137383 | 73137481 |
| chr15 | 73571168 | 73571283 |
| chr15 | 74212482 | 74212576 |
| chr15 | 74719605 | 74719700 |
| chr15 | 74892200 | 74892352 |
| chr15 | 75085505 | 75085861 |
| chr15 | 75086023 | 75086140 |
| chr15 | 75086250 | 75087043 |
| chr15 | 75401656 | 75401846 |
| chr15 | 75616498 | 75616605 |
| chr15 | 75748353 | 75748430 |
| chr15 | 75826791 | 75826949 |
| chr15 | 75844400 | 75844530 |
| chr15 | 75854190 | 75854441 |
| chr15 | 75868269 | 75868491 |
| chr15 | 75894539 | 75894675 |
| chr15 | 75975898 | 75975999 |
| chr15 | 76209163 | 76209298 |
| chr15 | 76327398 | 76327488 |
| chr15 | 76351101 | 76351255 |
| chr15 | 76544427 | 76544518 |
| chr15 | 76660161 | 76660281 |
| chr15 | 76724641 | 76724734 |
| chr15 | 77338578 | 77338749 |
| chr15 | 77482565 | 77482693 |
| chr15 | 77740683 | 77740784 |
| chr15 | 77842257 | 77842386 |



|       |          |          |
|-------|----------|----------|
| chr15 | 77919537 | 77919681 |
| chr15 | 77928957 | 77929148 |
| chr15 | 78174169 | 78174441 |
| chr15 | 78405970 | 78406061 |
| chr15 | 78532710 | 78532930 |
| chr15 | 78687037 | 78687152 |
| chr15 | 78845009 | 78845145 |
| chr15 | 78947805 | 78947904 |
| chr15 | 79063010 | 79063200 |
| chr15 | 79234933 | 79235016 |
| chr15 | 79328489 | 79328604 |
| chr15 | 79368626 | 79368712 |
| chr15 | 79690604 | 79690814 |
| chr15 | 80159344 | 80159586 |
| chr15 | 80208676 | 80208832 |
| chr15 | 80233917 | 80234053 |
| chr15 | 80255047 | 80255160 |
| chr15 | 80711065 | 80711197 |
| chr15 | 80742989 | 80743204 |
| chr15 | 80989871 | 80989990 |
| chr15 | 81190895 | 81190979 |
| chr15 | 81807102 | 81807240 |
| chr15 | 81872283 | 81872371 |
| chr15 | 82127833 | 82127942 |
| chr15 | 82407183 | 82407324 |
| chr15 | 82450220 | 82450377 |
| chr15 | 82693062 | 82693162 |
| chr15 | 82794275 | 82794617 |
| chr15 | 83100118 | 83100280 |
| chr15 | 83274390 | 83274504 |
| chr15 | 83321614 | 83321688 |
| chr15 | 83344431 | 83344636 |
| chr15 | 83367464 | 83367585 |
| chr15 | 83451743 | 83451947 |
| chr15 | 83464636 | 83464771 |
| chr15 | 83474201 | 83474279 |
| chr15 | 84675392 | 84675609 |
| chr15 | 85027782 | 85027888 |
| chr15 | 85030769 | 85030896 |
| chr15 | 85311019 | 85311258 |
| chr15 | 85424362 | 85424557 |
| chr15 | 85613561 | 85613680 |
| chr15 | 85634679 | 85634794 |
| chr15 | 85685095 | 85685170 |
| chr15 | 86092425 | 86092515 |

|       |           |           |
|-------|-----------|-----------|
| chr15 | 86195029  | 86195248  |
| chr15 | 88819399  | 88819551  |
| chr15 | 88837251  | 88837334  |
| chr15 | 89396990  | 89397202  |
| chr15 | 90717809  | 90717935  |
| chr15 | 94543547  | 94543647  |
| chr15 | 94951444  | 94951589  |
| chr15 | 96035382  | 96035598  |
| chr15 | 96270673  | 96270750  |
| chr15 | 96494505  | 96494614  |
| chr15 | 97560226  | 97560450  |
| chr15 | 97581777  | 97581966  |
| chr15 | 98610023  | 98610120  |
| chr15 | 98617051  | 98617141  |
| chr15 | 98626238  | 98626337  |
| chr15 | 98677487  | 98677640  |
| chr15 | 98918233  | 98918385  |
| chr15 | 99030082  | 99030186  |
| chr15 | 99099302  | 99099542  |
| chr15 | 99284660  | 99284786  |
| chr15 | 99382973  | 99383124  |
| chr15 | 99393599  | 99393686  |
| chr15 | 99403645  | 99403733  |
| chr15 | 99510046  | 99510151  |
| chr15 | 99846687  | 99846819  |
| chr15 | 99852755  | 99852838  |
| chr15 | 99917335  | 99917478  |
| chr15 | 100119502 | 100119582 |
| chr15 | 100183657 | 100183735 |
| chr15 | 100738460 | 100738654 |
| chr15 | 100747065 | 100747158 |
| chr15 | 101182639 | 101182739 |
| chr15 | 101246373 | 101246461 |
| chr15 | 101996100 | 101996248 |
| chr15 | 102016213 | 102016326 |
| chr15 | 102044921 | 102045003 |
| chr15 | 102395297 | 102395385 |
| chr15 | 102405654 | 102406224 |
| chr15 | 102517891 | 102518131 |
| chr15 | 103239403 | 103239583 |
| chr15 | 103272712 | 103272820 |
| chr15 | 103306124 | 103306207 |
| chr16 | 3114938   | 3115175   |
| chr16 | 3116271   | 3116386   |
| chr16 | 3350076   | 3350431   |

|       |          |          |
|-------|----------|----------|
| chr16 | 3351082  | 3351169  |
| chr16 | 3351399  | 3351530  |
| chr16 | 3351819  | 3351916  |
| chr16 | 3847162  | 3847257  |
| chr16 | 4439737  | 4439900  |
| chr16 | 4557063  | 4557232  |
| chr16 | 4586670  | 4586809  |
| chr16 | 4640785  | 4640922  |
| chr16 | 4777996  | 4778195  |
| chr16 | 4896914  | 4897055  |
| chr16 | 5013543  | 5013653  |
| chr16 | 5132538  | 5132640  |
| chr16 | 5256037  | 5256152  |
| chr16 | 10350067 | 10350154 |
| chr16 | 10452421 | 10452672 |
| chr16 | 10543062 | 10543241 |
| chr16 | 10694636 | 10694762 |
| chr16 | 10802436 | 10802638 |
| chr16 | 10838488 | 10838750 |
| chr16 | 11016583 | 11016709 |
| chr16 | 11134732 | 11134834 |
| chr16 | 11143910 | 11144314 |
| chr16 | 13206014 | 13206095 |
| chr16 | 13276315 | 13276454 |
| chr16 | 13276542 | 13276630 |
| chr16 | 13330430 | 13330503 |
| chr16 | 13715137 | 13715353 |
| chr16 | 13729597 | 13729767 |
| chr16 | 13883493 | 13883676 |
| chr16 | 14317408 | 14317558 |
| chr16 | 14939611 | 14939763 |
| chr16 | 15637393 | 15637543 |
| chr16 | 15984528 | 15984672 |
| chr16 | 16224715 | 16224851 |
| chr16 | 16485523 | 16485968 |
| chr16 | 16560194 | 16560610 |
| chr16 | 16600570 | 16600744 |
| chr16 | 16983281 | 16983410 |
| chr16 | 17132363 | 17132478 |
| chr16 | 17150659 | 17150850 |
| chr16 | 17167327 | 17167402 |
| chr16 | 17175961 | 17176054 |
| chr16 | 17190844 | 17190929 |
| chr16 | 17222279 | 17222441 |
| chr16 | 17243826 | 17243984 |

|       |          |          |
|-------|----------|----------|
| chr16 | 17509009 | 17509129 |
| chr16 | 17938341 | 17938436 |
| chr16 | 17939328 | 17939509 |
| chr16 | 18343939 | 18344057 |
| chr16 | 18348082 | 18348163 |
| chr16 | 18433581 | 18433751 |
| chr16 | 18533210 | 18533329 |
| chr16 | 18811676 | 18811805 |
| chr16 | 20548434 | 20548573 |
| chr16 | 20717492 | 20717571 |
| chr16 | 20829608 | 20829739 |
| chr16 | 21998175 | 21998289 |
| chr16 | 22009334 | 22009422 |
| chr16 | 22076711 | 22076816 |
| chr16 | 22141063 | 22141190 |
| chr16 | 22198241 | 22198355 |
| chr16 | 22439734 | 22439976 |
| chr16 | 22470108 | 22470193 |
| chr16 | 22518177 | 22518298 |
| chr16 | 22857574 | 22857669 |
| chr16 | 23127844 | 23127937 |
| chr16 | 23174018 | 23174158 |
| chr16 | 23511329 | 23511436 |
| chr16 | 24057119 | 24057371 |
| chr16 | 24313632 | 24313759 |
| chr16 | 24376587 | 24376750 |
| chr16 | 24404158 | 24404273 |
| chr16 | 24434151 | 24434243 |
| chr16 | 24449974 | 24450087 |
| chr16 | 25054376 | 25054542 |
| chr16 | 25058874 | 25059015 |
| chr16 | 25407465 | 25407548 |
| chr16 | 25426501 | 25426651 |
| chr16 | 26590991 | 26591084 |
| chr16 | 29579263 | 29579376 |
| chr16 | 29788217 | 29788335 |
| chr16 | 29788435 | 29788520 |
| chr16 | 29814173 | 29814282 |
| chr16 | 29915526 | 29915615 |
| chr16 | 30047423 | 30047793 |
| chr16 | 30065153 | 30065230 |
| chr16 | 30645987 | 30646082 |
| chr16 | 30655875 | 30655964 |
| chr16 | 30791306 | 30791380 |
| chr16 | 30827974 | 30828114 |

|       |          |          |
|-------|----------|----------|
| chr16 | 30835749 | 30835979 |
| chr16 | 30977255 | 30977406 |
| chr16 | 31235518 | 31235649 |
| chr16 | 31454115 | 31454225 |
| chr16 | 31506984 | 31507113 |
| chr16 | 32563179 | 32563258 |
| chr16 | 32689002 | 32689075 |
| chr16 | 32740472 | 32740588 |
| chr16 | 33337394 | 33337496 |
| chr16 | 33764668 | 33764850 |
| chr16 | 33777233 | 33777504 |
| chr16 | 34862113 | 34862347 |
| chr16 | 35742340 | 35742537 |
| chr16 | 35981676 | 35981813 |
| chr16 | 36087881 | 36088079 |
| chr16 | 36545556 | 36545661 |
| chr16 | 36691578 | 36691773 |
| chr16 | 36874916 | 36875113 |
| chr16 | 37539783 | 37539888 |
| chr16 | 37654430 | 37654511 |
| chr16 | 38089065 | 38089155 |
| chr16 | 38100606 | 38100778 |
| chr16 | 38282640 | 38282799 |
| chr16 | 38294779 | 38294880 |
| chr16 | 38773166 | 38773247 |
| chr16 | 39667999 | 39668227 |
| chr16 | 42807726 | 42807803 |
| chr16 | 42875408 | 42875724 |
| chr16 | 43889742 | 43889838 |
| chr16 | 44172964 | 44173047 |
| chr16 | 44175245 | 44175375 |
| chr16 | 45654040 | 45654218 |
| chr16 | 45838031 | 45838112 |
| chr16 | 46010382 | 46010490 |
| chr16 | 47171831 | 47172066 |
| chr16 | 52333702 | 52333938 |
| chr16 | 52438437 | 52438550 |
| chr16 | 55612909 | 55613040 |
| chr16 | 56636981 | 56637102 |
| chr16 | 56717548 | 56717678 |
| chr16 | 57093306 | 57093403 |
| chr16 | 57391159 | 57391677 |
| chr16 | 57495906 | 57496075 |
| chr16 | 58408353 | 58408432 |
| chr16 | 58476304 | 58476396 |

|       |          |          |
|-------|----------|----------|
| chr16 | 64851861 | 64851967 |
| chr16 | 65664033 | 65664106 |
| chr16 | 72920308 | 72920398 |
| chr16 | 73172114 | 73172215 |
| chr16 | 76225435 | 76225582 |
| chr16 | 76226056 | 76226172 |
| chr16 | 76242938 | 76243127 |
| chr16 | 76453788 | 76454006 |
| chr16 | 76541054 | 76541254 |
| chr16 | 76958769 | 76958873 |
| chr16 | 76992574 | 76992794 |
| chr16 | 77330001 | 77330085 |
| chr16 | 78260472 | 78260764 |
| chr16 | 78318158 | 78318254 |
| chr16 | 84824977 | 84825100 |
| chr16 | 84834910 | 84835049 |
| chr16 | 85455213 | 85455376 |
| chr16 | 86389184 | 86389291 |
| chr16 | 86820809 | 86820907 |
| chr16 | 87318484 | 87318564 |
| chr16 | 87432591 | 87432679 |
| chr16 | 87443293 | 87443443 |
| chr16 | 88631594 | 88631721 |
| chr16 | 90821165 | 90821429 |
| chr16 | 91452599 | 91452686 |
| chr16 | 91485036 | 91485115 |
| chr16 | 91597760 | 91597933 |
| chr16 | 91702973 | 91703206 |
| chr16 | 91728769 | 91728854 |
| chr16 | 91747661 | 91747738 |
| chr16 | 92039646 | 92039755 |
| chr16 | 92051884 | 92052103 |
| chr16 | 92400167 | 92400312 |
| chr16 | 92408036 | 92408194 |
| chr16 | 92466280 | 92466379 |
| chr16 | 92609402 | 92609511 |
| chr16 | 92631084 | 92631160 |
| chr16 | 92653906 | 92654093 |
| chr16 | 92687060 | 92687183 |
| chr16 | 92904066 | 92904159 |
| chr16 | 93368233 | 93368308 |
| chr16 | 93546589 | 93546729 |
| chr16 | 93615249 | 93615481 |
| chr16 | 93638703 | 93638865 |
| chr16 | 93711666 | 93711742 |

|       |          |          |
|-------|----------|----------|
| chr16 | 93733333 | 93733430 |
| chr16 | 93789191 | 93789331 |
| chr16 | 94150271 | 94150429 |
| chr16 | 95682336 | 95682601 |
| chr16 | 95708732 | 95708876 |
| chr16 | 95778481 | 95778610 |
| chr16 | 95779247 | 95779444 |
| chr16 | 95860137 | 95860339 |
| chr16 | 95926609 | 95926900 |
| chr16 | 95945453 | 95945536 |
| chr16 | 96127960 | 96128116 |
| chr16 | 97401922 | 97402004 |
| chr16 | 97496224 | 97496324 |
| chr16 | 97593035 | 97593116 |
| chr16 | 97594136 | 97594212 |
| chr16 | 97659543 | 97659727 |
| chr16 | 97996972 | 97997048 |
| chr16 | 98082562 | 98082641 |
| chr16 | 98107522 | 98107767 |
| chr17 | 3080671  | 3080827  |
| chr17 | 3557825  | 3558006  |
| chr17 | 4769238  | 4769523  |
| chr17 | 5082507  | 5082642  |
| chr17 | 5153573  | 5153754  |
| chr17 | 5770531  | 5770612  |
| chr17 | 5935058  | 5935150  |
| chr17 | 5965284  | 5965358  |
| chr17 | 5968759  | 5968915  |
| chr17 | 6036591  | 6036733  |
| chr17 | 6079779  | 6079864  |
| chr17 | 6178681  | 6178919  |
| chr17 | 6279438  | 6279517  |
| chr17 | 6468103  | 6468246  |
| chr17 | 6640911  | 6641012  |
| chr17 | 6728290  | 6728549  |
| chr17 | 6766624  | 6767062  |
| chr17 | 6828975  | 6829104  |
| chr17 | 6835686  | 6835772  |
| chr17 | 6898131  | 6898271  |
| chr17 | 7169844  | 7170097  |
| chr17 | 7985720  | 7986021  |
| chr17 | 8283863  | 8283951  |
| chr17 | 8367758  | 8367888  |
| chr17 | 9031021  | 9031109  |
| chr17 | 11092982 | 11093142 |

|       |          |          |
|-------|----------|----------|
| chr17 | 12206014 | 12206125 |
| chr17 | 12337294 | 12337465 |
| chr17 | 12792557 | 12792712 |
| chr17 | 13305990 | 13306201 |
| chr17 | 13550737 | 13550815 |
| chr17 | 13552145 | 13552231 |
| chr17 | 13589911 | 13589988 |
| chr17 | 13590396 | 13590669 |
| chr17 | 13590965 | 13591054 |
| chr17 | 13654619 | 13654872 |
| chr17 | 13654956 | 13655094 |
| chr17 | 13671778 | 13672048 |
| chr17 | 13683855 | 13684062 |
| chr17 | 15088228 | 15088353 |
| chr17 | 15657272 | 15657404 |
| chr17 | 17837902 | 17838029 |
| chr17 | 17910225 | 17910349 |
| chr17 | 20945137 | 20945427 |
| chr17 | 22314948 | 22315123 |
| chr17 | 23803000 | 23803155 |
| chr17 | 23924824 | 23924907 |
| chr17 | 23967128 | 23967323 |
| chr17 | 24000641 | 24000828 |
| chr17 | 24426499 | 24426577 |
| chr17 | 24455405 | 24455519 |
| chr17 | 24527911 | 24528085 |
| chr17 | 24736404 | 24736656 |
| chr17 | 24886396 | 24886652 |
| chr17 | 25015999 | 25016116 |
| chr17 | 25282179 | 25282299 |
| chr17 | 25372627 | 25372787 |
| chr17 | 25635462 | 25635550 |
| chr17 | 25727494 | 25727712 |
| chr17 | 25832993 | 25833140 |
| chr17 | 25833423 | 25833537 |
| chr17 | 25919978 | 25920242 |
| chr17 | 26138473 | 26138656 |
| chr17 | 26422448 | 26422611 |
| chr17 | 26522907 | 26523058 |
| chr17 | 26616744 | 26616913 |
| chr17 | 26716262 | 26716551 |
| chr17 | 27008414 | 27008509 |
| chr17 | 27028601 | 27028676 |
| chr17 | 27083755 | 27083857 |
| chr17 | 27797028 | 27797227 |



|       |          |          |
|-------|----------|----------|
| chr17 | 27820837 | 27821081 |
| chr17 | 27839897 | 27840019 |
| chr17 | 27914839 | 27915000 |
| chr17 | 28013428 | 28013668 |
| chr17 | 28313300 | 28313535 |
| chr17 | 28327908 | 28328021 |
| chr17 | 28350228 | 28350310 |
| chr17 | 28690942 | 28691017 |
| chr17 | 28843777 | 28843893 |
| chr17 | 28913216 | 28913552 |
| chr17 | 29050115 | 29050378 |
| chr17 | 29160281 | 29160360 |
| chr17 | 29258201 | 29258346 |
| chr17 | 30137008 | 30137099 |
| chr17 | 30611482 | 30611672 |
| chr17 | 31319617 | 31319806 |
| chr17 | 31570433 | 31570533 |
| chr17 | 31658818 | 31658893 |
| chr17 | 31965627 | 31965838 |
| chr17 | 32099061 | 32099158 |
| chr17 | 32115045 | 32115160 |
| chr17 | 32350562 | 32350739 |
| chr17 | 32483407 | 32483529 |
| chr17 | 32661703 | 32661827 |
| chr17 | 32891615 | 32891704 |
| chr17 | 33760354 | 33760639 |
| chr17 | 33788704 | 33789030 |
| chr17 | 33890705 | 33890891 |
| chr17 | 33915779 | 33915864 |
| chr17 | 33978798 | 33978944 |
| chr17 | 34497869 | 34497949 |
| chr17 | 34603763 | 34604141 |
| chr17 | 35164979 | 35165055 |
| chr17 | 35394021 | 35394125 |
| chr17 | 35424772 | 35424876 |
| chr17 | 35439116 | 35439226 |
| chr17 | 35516950 | 35517132 |
| chr17 | 35537538 | 35537727 |
| chr17 | 35556881 | 35557077 |
| chr17 | 35673741 | 35673888 |
| chr17 | 35823041 | 35823137 |
| chr17 | 35841493 | 35841572 |
| chr17 | 36035122 | 36035199 |
| chr17 | 36231255 | 36231590 |
| chr17 | 36835977 | 36836126 |

|       |          |          |
|-------|----------|----------|
| chr17 | 36867163 | 36867379 |
| chr17 | 36885498 | 36885625 |
| chr17 | 36897136 | 36897347 |
| chr17 | 37228516 | 37228628 |
| chr17 | 37242396 | 37242520 |
| chr17 | 39843249 | 39843472 |
| chr17 | 39843622 | 39844086 |
| chr17 | 39845065 | 39845205 |
| chr17 | 39846303 | 39846521 |
| chr17 | 39846665 | 39847370 |
| chr17 | 39847467 | 39848562 |
| chr17 | 42938576 | 42938758 |
| chr17 | 43069235 | 43069441 |
| chr17 | 43130237 | 43130347 |
| chr17 | 43138493 | 43138644 |
| chr17 | 43504358 | 43504515 |
| chr17 | 44165956 | 44166045 |
| chr17 | 44408825 | 44408918 |
| chr17 | 44588062 | 44588333 |
| chr17 | 44767614 | 44767751 |
| chr17 | 45994603 | 45994739 |
| chr17 | 45997104 | 45997261 |
| chr17 | 46076176 | 46076347 |
| chr17 | 46144223 | 46144319 |
| chr17 | 46160843 | 46160963 |
| chr17 | 46556240 | 46556326 |
| chr17 | 46645163 | 46645311 |
| chr17 | 46776281 | 46776395 |
| chr17 | 47449018 | 47449146 |
| chr17 | 48019698 | 48019796 |
| chr17 | 48409844 | 48410075 |
| chr17 | 48452229 | 48452338 |
| chr17 | 48458178 | 48458314 |
| chr17 | 48738847 | 48738957 |
| chr17 | 49423051 | 49423246 |
| chr17 | 50685124 | 50685335 |
| chr17 | 53854003 | 53854134 |
| chr17 | 56032239 | 56032380 |
| chr17 | 56078977 | 56079304 |
| chr17 | 56079421 | 56079562 |
| chr17 | 56163817 | 56163970 |
| chr17 | 56256615 | 56256709 |
| chr17 | 56276924 | 56277017 |
| chr17 | 56325713 | 56325795 |
| chr17 | 56462332 | 56462536 |

|       |          |          |
|-------|----------|----------|
| chr17 | 56609758 | 56609838 |
| chr17 | 56627263 | 56627359 |
| chr17 | 56997136 | 56997275 |
| chr17 | 57031630 | 57032059 |
| chr17 | 57247725 | 57247926 |
| chr17 | 58903959 | 58904202 |
| chr17 | 63246168 | 63246416 |
| chr17 | 64332055 | 64332153 |
| chr17 | 64577644 | 64577775 |
| chr17 | 64645146 | 64645395 |
| chr17 | 64935793 | 64935947 |
| chr17 | 65548989 | 65549091 |
| chr17 | 65617066 | 65617237 |
| chr17 | 65774519 | 65774648 |
| chr17 | 65813809 | 65813897 |
| chr17 | 65884942 | 65885087 |
| chr17 | 66510229 | 66510370 |
| chr17 | 67741376 | 67741521 |
| chr17 | 70836940 | 70837028 |
| chr17 | 70853110 | 70853208 |
| chr17 | 70963659 | 70963826 |
| chr17 | 71097389 | 71097496 |
| chr17 | 71476913 | 71477058 |
| chr17 | 72836314 | 72836504 |
| chr17 | 72957322 | 72957422 |
| chr17 | 73942401 | 73942476 |
| chr17 | 73950220 | 73950329 |
| chr17 | 74395465 | 74395541 |
| chr17 | 74402668 | 74402773 |
| chr17 | 74459189 | 74459289 |
| chr17 | 74528196 | 74528310 |
| chr17 | 75109220 | 75109308 |
| chr17 | 75110555 | 75110662 |
| chr17 | 75432692 | 75432947 |
| chr17 | 75477190 | 75477362 |
| chr17 | 75551800 | 75551893 |
| chr17 | 78218599 | 78218763 |
| chr17 | 78261796 | 78261876 |
| chr17 | 78388336 | 78388498 |
| chr17 | 79746163 | 79746271 |
| chr17 | 79752053 | 79752203 |
| chr17 | 79892061 | 79892150 |
| chr17 | 80062297 | 80062389 |
| chr17 | 80432097 | 80432193 |
| chr17 | 80728610 | 80728766 |

|       |          |          |
|-------|----------|----------|
| chr17 | 80765427 | 80765519 |
| chr17 | 83148427 | 83148619 |
| chr17 | 83222848 | 83223055 |
| chr17 | 83307719 | 83307805 |
| chr17 | 83308559 | 83308670 |
| chr17 | 83320005 | 83320120 |
| chr17 | 83376953 | 83377054 |
| chr17 | 83503836 | 83503918 |
| chr17 | 83645346 | 83645500 |
| chr17 | 83958809 | 83959001 |
| chr17 | 84026357 | 84026439 |
| chr17 | 84106708 | 84106784 |
| chr17 | 84157169 | 84157343 |
| chr17 | 84244789 | 84244888 |
| chr17 | 84251418 | 84251731 |
| chr17 | 84366134 | 84366248 |
| chr17 | 84672523 | 84672756 |
| chr17 | 84879256 | 84879467 |
| chr17 | 84893610 | 84893693 |
| chr17 | 84957640 | 84957894 |
| chr17 | 85052459 | 85052696 |
| chr17 | 85541442 | 85541633 |
| chr17 | 86444827 | 86445052 |
| chr17 | 86560642 | 86560723 |
| chr17 | 87170526 | 87170606 |
| chr17 | 87628313 | 87628450 |
| chr17 | 87672387 | 87672501 |
| chr17 | 88511187 | 88511316 |
| chr17 | 94887176 | 94887258 |
| chr18 | 3004806  | 3004954  |
| chr18 | 3005260  | 3005514  |
| chr18 | 3005652  | 3005974  |
| chr18 | 4737796  | 4737923  |
| chr18 | 4970970  | 4971044  |
| chr18 | 5334814  | 5334899  |
| chr18 | 6086528  | 6086661  |
| chr18 | 6136218  | 6136422  |
| chr18 | 6199494  | 6199567  |
| chr18 | 6276098  | 6276242  |
| chr18 | 6745527  | 6745601  |
| chr18 | 7626964  | 7627130  |
| chr18 | 7666060  | 7666264  |
| chr18 | 10242499 | 10242638 |
| chr18 | 10849376 | 10849489 |
| chr18 | 10913735 | 10913813 |

|       |          |          |
|-------|----------|----------|
| chr18 | 11052493 | 11052599 |
| chr18 | 11205207 | 11205283 |
| chr18 | 11425822 | 11425909 |
| chr18 | 11442509 | 11442633 |
| chr18 | 12041396 | 12041565 |
| chr18 | 12128575 | 12128726 |
| chr18 | 12236447 | 12236564 |
| chr18 | 12274264 | 12274388 |
| chr18 | 12949253 | 12949330 |
| chr18 | 13082101 | 13082269 |
| chr18 | 14103305 | 14103387 |
| chr18 | 15420638 | 15420836 |
| chr18 | 20057883 | 20058095 |
| chr18 | 20210444 | 20210694 |
| chr18 | 20734463 | 20734548 |
| chr18 | 20757489 | 20757651 |
| chr18 | 20782498 | 20782751 |
| chr18 | 20811525 | 20811654 |
| chr18 | 20936983 | 20937110 |
| chr18 | 21001775 | 21001857 |
| chr18 | 21084186 | 21084351 |
| chr18 | 21215093 | 21215370 |
| chr18 | 21300248 | 21300419 |
| chr18 | 23754700 | 23754815 |
| chr18 | 23815434 | 23815531 |
| chr18 | 28470543 | 28470690 |
| chr18 | 30272710 | 30272817 |
| chr18 | 31634837 | 31635031 |
| chr18 | 31759842 | 31759936 |
| chr18 | 31934625 | 31934723 |
| chr18 | 31999218 | 31999346 |
| chr18 | 32150421 | 32150536 |
| chr18 | 32251835 | 32251991 |
| chr18 | 33214054 | 33214130 |
| chr18 | 33374077 | 33374150 |
| chr18 | 33463947 | 33464110 |
| chr18 | 33552669 | 33552792 |
| chr18 | 33849493 | 33849650 |
| chr18 | 34932002 | 34932126 |
| chr18 | 34954688 | 34954771 |
| chr18 | 35052036 | 35052294 |
| chr18 | 35065847 | 35066100 |
| chr18 | 35103496 | 35103581 |
| chr18 | 35676158 | 35676456 |
| chr18 | 35746851 | 35747093 |

|       |          |          |
|-------|----------|----------|
| chr18 | 36384133 | 36384244 |
| chr18 | 36384329 | 36384404 |
| chr18 | 36405772 | 36405887 |
| chr18 | 36415326 | 36415705 |
| chr18 | 36487046 | 36487180 |
| chr18 | 36560308 | 36560453 |
| chr18 | 36703198 | 36703475 |
| chr18 | 36744527 | 36744641 |
| chr18 | 38200220 | 38200449 |
| chr18 | 38207844 | 38207989 |
| chr18 | 38250509 | 38250648 |
| chr18 | 38746836 | 38747052 |
| chr18 | 38844389 | 38844473 |
| chr18 | 38993009 | 38993152 |
| chr18 | 39693178 | 39693304 |
| chr18 | 39693460 | 39693614 |
| chr18 | 39737746 | 39737857 |
| chr18 | 40308023 | 40308317 |
| chr18 | 40414643 | 40414724 |
| chr18 | 42275164 | 42275274 |
| chr18 | 42511277 | 42511432 |
| chr18 | 42558336 | 42558421 |
| chr18 | 42558614 | 42558715 |
| chr18 | 42770453 | 42770582 |
| chr18 | 42790697 | 42790863 |
| chr18 | 43250519 | 43250599 |
| chr18 | 44380389 | 44380469 |
| chr18 | 44825297 | 44825484 |
| chr18 | 46525838 | 46525943 |
| chr18 | 46553851 | 46553956 |
| chr18 | 47443934 | 47444122 |
| chr18 | 48010416 | 48010508 |
| chr18 | 49832340 | 49832563 |
| chr18 | 50176699 | 50176812 |
| chr18 | 53744947 | 53745149 |
| chr18 | 53807262 | 53807379 |
| chr18 | 53855001 | 53855166 |
| chr18 | 54699073 | 54699358 |
| chr18 | 54828187 | 54828431 |
| chr18 | 54906832 | 54907041 |
| chr18 | 55624180 | 55624303 |
| chr18 | 56008259 | 56008424 |
| chr18 | 56513849 | 56513926 |
| chr18 | 56687774 | 56687897 |
| chr18 | 56737511 | 56737655 |

|       |          |          |
|-------|----------|----------|
| chr18 | 56925614 | 56925710 |
| chr18 | 57698528 | 57698713 |
| chr18 | 57744824 | 57745092 |
| chr18 | 57837140 | 57837326 |
| chr18 | 58055779 | 58055869 |
| chr18 | 60502604 | 60502685 |
| chr18 | 60606144 | 60606409 |
| chr18 | 60661286 | 60661602 |
| chr18 | 61018139 | 61018251 |
| chr18 | 61212954 | 61213083 |
| chr18 | 61236238 | 61236457 |
| chr18 | 61279187 | 61279476 |
| chr18 | 61614353 | 61614505 |
| chr18 | 61626571 | 61626654 |
| chr18 | 61626741 | 61626898 |
| chr18 | 61643911 | 61643988 |
| chr18 | 61707676 | 61707776 |
| chr18 | 61782343 | 61782458 |
| chr18 | 61934352 | 61934436 |
| chr18 | 62002021 | 62002117 |
| chr18 | 62180037 | 62180121 |
| chr18 | 64182719 | 64182812 |
| chr18 | 64339899 | 64340001 |
| chr18 | 64618985 | 64619064 |
| chr18 | 64643758 | 64643840 |
| chr18 | 64655310 | 64655457 |
| chr18 | 64839599 | 64839753 |
| chr18 | 64850556 | 64850634 |
| chr18 | 65300901 | 65300993 |
| chr18 | 65430774 | 65430888 |
| chr18 | 66002801 | 66002879 |
| chr18 | 66038475 | 66038556 |
| chr18 | 67449277 | 67449441 |
| chr18 | 68059097 | 68059177 |
| chr18 | 68692069 | 68692287 |
| chr18 | 68976498 | 68976678 |
| chr18 | 69144093 | 69144194 |
| chr18 | 69225165 | 69225282 |
| chr18 | 69303849 | 69304030 |
| chr18 | 69317996 | 69318126 |
| chr18 | 69925421 | 69925503 |
| chr18 | 70090242 | 70090326 |
| chr18 | 70644496 | 70644589 |
| chr18 | 73572677 | 73572829 |
| chr18 | 73785917 | 73786082 |

|       |          |          |
|-------|----------|----------|
| chr18 | 73947925 | 73948046 |
| chr18 | 74545230 | 74545384 |
| chr18 | 74551713 | 74551799 |
| chr18 | 74740046 | 74740169 |
| chr18 | 75300149 | 75300306 |
| chr18 | 75499299 | 75499565 |
| chr18 | 79026887 | 79027155 |
| chr18 | 80227168 | 80227282 |
| chr18 | 80654082 | 80654323 |
| chr18 | 82509460 | 82509604 |
| chr18 | 82512243 | 82512397 |
| chr18 | 82764064 | 82764147 |
| chr18 | 82921654 | 82921752 |
| chr18 | 84082371 | 84082468 |
| chr18 | 84685767 | 84685841 |
| chr18 | 84851220 | 84851315 |
| chr18 | 84906349 | 84906573 |
| chr18 | 87657973 | 87658061 |
| chr18 | 90602191 | 90602601 |
| chr19 | 3320251  | 3320427  |
| chr19 | 3325578  | 3325702  |
| chr19 | 3575734  | 3575892  |
| chr19 | 3833061  | 3833338  |
| chr19 | 3912787  | 3912935  |
| chr19 | 4012798  | 4012899  |
| chr19 | 4046907  | 4046986  |
| chr19 | 4121548  | 4121701  |
| chr19 | 4417410  | 4417525  |
| chr19 | 4477832  | 4477933  |
| chr19 | 4496671  | 4496828  |
| chr19 | 4510154  | 4510250  |
| chr19 | 4793948  | 4794149  |
| chr19 | 4811650  | 4811907  |
| chr19 | 4817149  | 4817439  |
| chr19 | 4839304  | 4839430  |
| chr19 | 5005015  | 5005121  |
| chr19 | 5023978  | 5024056  |
| chr19 | 5088276  | 5088454  |
| chr19 | 5480160  | 5480253  |
| chr19 | 5489133  | 5489253  |
| chr19 | 5518802  | 5518998  |
| chr19 | 5689635  | 5689759  |
| chr19 | 5810397  | 5810479  |
| chr19 | 5945251  | 5945358  |
| chr19 | 6046440  | 6046534  |



|       |          |          |
|-------|----------|----------|
| chr19 | 6241414  | 6241581  |
| chr19 | 6278276  | 6278432  |
| chr19 | 6363604  | 6363864  |
| chr19 | 6477059  | 6477222  |
| chr19 | 6921875  | 6922139  |
| chr19 | 6979977  | 6980069  |
| chr19 | 7040022  | 7040400  |
| chr19 | 7217709  | 7217832  |
| chr19 | 7498919  | 7499042  |
| chr19 | 8723321  | 8723398  |
| chr19 | 8741692  | 8741770  |
| chr19 | 8786196  | 8786394  |
| chr19 | 8802263  | 8802379  |
| chr19 | 8953641  | 8953776  |
| chr19 | 8966826  | 8966979  |
| chr19 | 8997697  | 8997776  |
| chr19 | 9899564  | 9899646  |
| chr19 | 9931228  | 9931396  |
| chr19 | 9966341  | 9966438  |
| chr19 | 9974962  | 9975223  |
| chr19 | 10060431 | 10060516 |
| chr19 | 10235876 | 10236070 |
| chr19 | 10236247 | 10236352 |
| chr19 | 10268067 | 10268197 |
| chr19 | 10277910 | 10278108 |
| chr19 | 11965253 | 11965691 |
| chr19 | 12004599 | 12004674 |
| chr19 | 12600814 | 12600965 |
| chr19 | 12796132 | 12796245 |
| chr19 | 14598196 | 14598307 |
| chr19 | 17140538 | 17140638 |
| chr19 | 17271392 | 17271487 |
| chr19 | 17316791 | 17316912 |
| chr19 | 18631843 | 18631988 |
| chr19 | 18890419 | 18890591 |
| chr19 | 20370319 | 20370401 |
| chr19 | 20406532 | 20406610 |
| chr19 | 20601844 | 20601962 |
| chr19 | 20654193 | 20654384 |
| chr19 | 21044042 | 21044293 |
| chr19 | 21652914 | 21653204 |
| chr19 | 21814506 | 21814629 |
| chr19 | 24271843 | 24272002 |
| chr19 | 24344781 | 24344926 |
| chr19 | 24359348 | 24359428 |

|       |          |          |
|-------|----------|----------|
| chr19 | 24427382 | 24427515 |
| chr19 | 24514776 | 24514862 |
| chr19 | 24961694 | 24961808 |
| chr19 | 25856372 | 25856518 |
| chr19 | 26439254 | 26439476 |
| chr19 | 27316898 | 27317016 |
| chr19 | 27328902 | 27329001 |
| chr19 | 27429895 | 27429978 |
| chr19 | 28331076 | 28331359 |
| chr19 | 28517671 | 28517801 |
| chr19 | 28916577 | 28916695 |
| chr19 | 29101284 | 29101406 |
| chr19 | 29216239 | 29216383 |
| chr19 | 29267575 | 29267724 |
| chr19 | 29361907 | 29361993 |
| chr19 | 29475377 | 29475600 |
| chr19 | 29563199 | 29563337 |
| chr19 | 29835391 | 29835619 |
| chr19 | 30118981 | 30119138 |
| chr19 | 32181468 | 32181563 |
| chr19 | 32189193 | 32189326 |
| chr19 | 32304218 | 32304299 |
| chr19 | 32359151 | 32359338 |
| chr19 | 32481663 | 32481875 |
| chr19 | 32547586 | 32547689 |
| chr19 | 32601203 | 32601318 |
| chr19 | 32755909 | 32755994 |
| chr19 | 33849990 | 33850075 |
| chr19 | 34066888 | 34066979 |
| chr19 | 34074370 | 34074505 |
| chr19 | 34166078 | 34166186 |
| chr19 | 34209144 | 34209303 |
| chr19 | 37262521 | 37262643 |
| chr19 | 37376157 | 37376333 |
| chr19 | 37392023 | 37392143 |
| chr19 | 37528809 | 37528920 |
| chr19 | 38033048 | 38033233 |
| chr19 | 38054739 | 38054872 |
| chr19 | 38083149 | 38083307 |
| chr19 | 38638903 | 38639004 |
| chr19 | 38976457 | 38976548 |
| chr19 | 38990655 | 38990752 |
| chr19 | 38998797 | 38998959 |
| chr19 | 40187270 | 40187419 |
| chr19 | 40247507 | 40247620 |

|       |          |          |
|-------|----------|----------|
| chr19 | 40307768 | 40307841 |
| chr19 | 40500074 | 40500251 |
| chr19 | 40508743 | 40508852 |
| chr19 | 41261022 | 41261096 |
| chr19 | 41275719 | 41275814 |
| chr19 | 41474945 | 41475108 |
| chr19 | 41802074 | 41802193 |
| chr19 | 41857678 | 41857767 |
| chr19 | 41981407 | 41981518 |
| chr19 | 42072040 | 42072183 |
| chr19 | 42090142 | 42090259 |
| chr19 | 42129031 | 42129237 |
| chr19 | 43499059 | 43499137 |
| chr19 | 43524614 | 43524746 |
| chr19 | 43581290 | 43581378 |
| chr19 | 43674991 | 43675196 |
| chr19 | 43767707 | 43767841 |
| chr19 | 43916705 | 43916904 |
| chr19 | 44014002 | 44014075 |
| chr19 | 44014159 | 44014248 |
| chr19 | 44021710 | 44021875 |
| chr19 | 44146444 | 44146583 |
| chr19 | 44248227 | 44248300 |
| chr19 | 44280846 | 44280924 |
| chr19 | 45014589 | 45014705 |
| chr19 | 45046633 | 45046731 |
| chr19 | 45649984 | 45650221 |
| chr19 | 45790653 | 45790788 |
| chr19 | 45895490 | 45895656 |
| chr19 | 46152327 | 46152507 |
| chr19 | 46524818 | 46524988 |
| chr19 | 46573309 | 46573382 |
| chr19 | 46598901 | 46599030 |
| chr19 | 46900044 | 46900263 |
| chr19 | 46970525 | 46970611 |
| chr19 | 46988715 | 46988867 |
| chr19 | 47508915 | 47509053 |
| chr19 | 47579162 | 47579279 |
| chr19 | 53142510 | 53142703 |
| chr19 | 53731950 | 53732093 |
| chr19 | 53800150 | 53800294 |
| chr19 | 53944551 | 53944726 |
| chr19 | 54040386 | 54040685 |
| chr19 | 54070743 | 54070848 |
| chr19 | 54206937 | 54207013 |

|       |          |          |
|-------|----------|----------|
| chr19 | 55258128 | 55258218 |
| chr19 | 55271476 | 55271658 |
| chr19 | 55424096 | 55424188 |
| chr19 | 55570675 | 55570762 |
| chr19 | 55593369 | 55593496 |
| chr19 | 55689520 | 55689791 |
| chr19 | 55733095 | 55733204 |
| chr19 | 55788340 | 55788513 |
| chr19 | 55797929 | 55798024 |
| chr19 | 55838870 | 55838955 |
| chr19 | 55852085 | 55852273 |
| chr19 | 56461264 | 56461564 |
| chr19 | 56548408 | 56548617 |
| chr19 | 57079429 | 57079746 |
| chr19 | 57098239 | 57098378 |
| chr19 | 57534177 | 57534332 |
| chr19 | 58616767 | 58616858 |
| chr19 | 58759614 | 58759690 |
| chr19 | 59098441 | 59098582 |
| chr19 | 61199708 | 61199821 |
| chr19 | 61331282 | 61331541 |
| chr2  | 3050161  | 3050368  |
| chr2  | 3128942  | 3129139  |
| chr2  | 3283981  | 3284144  |
| chr2  | 3512813  | 3512993  |
| chr2  | 3624073  | 3624268  |
| chr2  | 3749027  | 3749120  |
| chr2  | 3964502  | 3964606  |
| chr2  | 5009511  | 5009589  |
| chr2  | 5012795  | 5012873  |
| chr2  | 5286496  | 5286686  |
| chr2  | 5379141  | 5379380  |
| chr2  | 6081218  | 6081389  |
| chr2  | 6213277  | 6213392  |
| chr2  | 6267733  | 6267858  |
| chr2  | 6378937  | 6379112  |
| chr2  | 6379968  | 6380059  |
| chr2  | 7246334  | 7246408  |
| chr2  | 9879631  | 9879741  |
| chr2  | 10272796 | 10272875 |
| chr2  | 11399520 | 11399601 |
| chr2  | 11429735 | 11429875 |
| chr2  | 11651662 | 11651737 |
| chr2  | 13271390 | 13271589 |
| chr2  | 13576110 | 13576276 |

|      |          |          |
|------|----------|----------|
| chr2 | 14258566 | 14258729 |
| chr2 | 15146536 | 15146660 |
| chr2 | 17717286 | 17717528 |
| chr2 | 18774444 | 18774541 |
| chr2 | 20597312 | 20597411 |
| chr2 | 20899852 | 20900176 |
| chr2 | 20936765 | 20937135 |
| chr2 | 20969578 | 20969678 |
| chr2 | 21028742 | 21028878 |
| chr2 | 21234981 | 21235128 |
| chr2 | 22587743 | 22587891 |
| chr2 | 22587965 | 22588118 |
| chr2 | 22588200 | 22588282 |
| chr2 | 22588831 | 22589019 |
| chr2 | 22589197 | 22589309 |
| chr2 | 22589482 | 22590190 |
| chr2 | 22744838 | 22744917 |
| chr2 | 22753671 | 22753745 |
| chr2 | 23078800 | 23078878 |
| chr2 | 23156059 | 23156136 |
| chr2 | 24378908 | 24378988 |
| chr2 | 24440320 | 24440431 |
| chr2 | 24460903 | 24461094 |
| chr2 | 24478802 | 24478875 |
| chr2 | 24563001 | 24563091 |
| chr2 | 24929162 | 24929273 |
| chr2 | 24975205 | 24975313 |
| chr2 | 25054382 | 25054461 |
| chr2 | 25127356 | 25127431 |
| chr2 | 25224809 | 25224957 |
| chr2 | 25262437 | 25262589 |
| chr2 | 25363611 | 25363730 |
| chr2 | 25461000 | 25461095 |
| chr2 | 25546999 | 25547080 |
| chr2 | 25574905 | 25574986 |
| chr2 | 25983364 | 25983542 |
| chr2 | 26423228 | 26423379 |
| chr2 | 26445407 | 26445562 |
| chr2 | 26611139 | 26611323 |
| chr2 | 26889386 | 26889476 |
| chr2 | 26890839 | 26890915 |
| chr2 | 26902871 | 26902957 |
| chr2 | 26933652 | 26933880 |
| chr2 | 26957259 | 26957409 |
| chr2 | 27416435 | 27416590 |

|      |          |          |
|------|----------|----------|
| chr2 | 27475677 | 27475845 |
| chr2 | 27540217 | 27540310 |
| chr2 | 27671678 | 27671797 |
| chr2 | 28304878 | 28304965 |
| chr2 | 28517524 | 28517658 |
| chr2 | 28630216 | 28630317 |
| chr2 | 29338573 | 29338646 |
| chr2 | 29827162 | 29827319 |
| chr2 | 30093715 | 30093810 |
| chr2 | 30364070 | 30364189 |
| chr2 | 30807763 | 30807854 |
| chr2 | 30981999 | 30982096 |
| chr2 | 31688088 | 31688375 |
| chr2 | 31771233 | 31771379 |
| chr2 | 31974242 | 31974325 |
| chr2 | 32154509 | 32154730 |
| chr2 | 32288179 | 32288255 |
| chr2 | 32424119 | 32424225 |
| chr2 | 32428292 | 32428518 |
| chr2 | 32437084 | 32437214 |
| chr2 | 32440793 | 32440975 |
| chr2 | 32451918 | 32452133 |
| chr2 | 32470945 | 32471219 |
| chr2 | 32715312 | 32715446 |
| chr2 | 32775474 | 32775605 |
| chr2 | 32982128 | 32982212 |
| chr2 | 33130773 | 33130892 |
| chr2 | 33131044 | 33131299 |
| chr2 | 33467707 | 33467788 |
| chr2 | 34261902 | 34262189 |
| chr2 | 34327030 | 34327209 |
| chr2 | 35423939 | 35424225 |
| chr2 | 35465850 | 35465974 |
| chr2 | 35509349 | 35509425 |
| chr2 | 35589997 | 35590211 |
| chr2 | 35691787 | 35691900 |
| chr2 | 35702681 | 35702867 |
| chr2 | 35749692 | 35749796 |
| chr2 | 36214017 | 36214176 |
| chr2 | 37708929 | 37709068 |
| chr2 | 38486001 | 38486235 |
| chr2 | 38623982 | 38624129 |
| chr2 | 39190861 | 39190985 |
| chr2 | 44926876 | 44927009 |
| chr2 | 45287686 | 45287823 |

|      |          |          |
|------|----------|----------|
| chr2 | 48399319 | 48399440 |
| chr2 | 48544491 | 48544589 |
| chr2 | 48624595 | 48624715 |
| chr2 | 49452931 | 49453046 |
| chr2 | 49815726 | 49815946 |
| chr2 | 50964124 | 50964432 |
| chr2 | 51137988 | 51138088 |
| chr2 | 51141432 | 51141620 |
| chr2 | 51914947 | 51915083 |
| chr2 | 53191281 | 53191414 |
| chr2 | 57251886 | 57252086 |
| chr2 | 57629495 | 57629703 |
| chr2 | 57799561 | 57799642 |
| chr2 | 58001588 | 58001732 |
| chr2 | 59168024 | 59168131 |
| chr2 | 59212477 | 59212550 |
| chr2 | 59220126 | 59220233 |
| chr2 | 59395478 | 59395554 |
| chr2 | 60510745 | 60511017 |
| chr2 | 60550006 | 60550098 |
| chr2 | 60583265 | 60583409 |
| chr2 | 60654990 | 60655134 |
| chr2 | 60689341 | 60689424 |
| chr2 | 60703466 | 60703716 |
| chr2 | 60865136 | 60865339 |
| chr2 | 60961953 | 60962082 |
| chr2 | 61086214 | 61086291 |
| chr2 | 61246760 | 61246844 |
| chr2 | 62646302 | 62646377 |
| chr2 | 62928666 | 62928751 |
| chr2 | 65237849 | 65237928 |
| chr2 | 66144830 | 66145025 |
| chr2 | 68435629 | 68435760 |
| chr2 | 68899911 | 68900186 |
| chr2 | 68935804 | 68936041 |
| chr2 | 68944996 | 68945261 |
| chr2 | 69355544 | 69355663 |
| chr2 | 70036925 | 70037041 |
| chr2 | 70092181 | 70092324 |
| chr2 | 70776922 | 70777083 |
| chr2 | 70783599 | 70783773 |
| chr2 | 71055629 | 71055708 |
| chr2 | 71083881 | 71084145 |
| chr2 | 71114044 | 71114374 |
| chr2 | 72255074 | 72255195 |

|      |          |          |
|------|----------|----------|
| chr2 | 72416557 | 72416724 |
| chr2 | 72600062 | 72600168 |
| chr2 | 72752757 | 72752921 |
| chr2 | 72785457 | 72785621 |
| chr2 | 72866084 | 72866365 |
| chr2 | 73056289 | 73056428 |
| chr2 | 73086064 | 73086208 |
| chr2 | 73386726 | 73386804 |
| chr2 | 73867931 | 73868034 |
| chr2 | 75632743 | 75632929 |
| chr2 | 75643264 | 75643341 |
| chr2 | 75704511 | 75704714 |
| chr2 | 75704996 | 75705110 |
| chr2 | 76512312 | 76512394 |
| chr2 | 77166575 | 77166794 |
| chr2 | 77279429 | 77279520 |
| chr2 | 77522319 | 77522544 |
| chr2 | 79532781 | 79532968 |
| chr2 | 79566321 | 79566417 |
| chr2 | 79618861 | 79619143 |
| chr2 | 81892659 | 81892735 |
| chr2 | 83758832 | 83758932 |
| chr2 | 84519638 | 84519784 |
| chr2 | 84519917 | 84519991 |
| chr2 | 84635738 | 84635997 |
| chr2 | 84678128 | 84678424 |
| chr2 | 85030051 | 85030190 |
| chr2 | 85047783 | 85047970 |
| chr2 | 85255812 | 85255905 |
| chr2 | 86182756 | 86182938 |
| chr2 | 87846968 | 87847286 |
| chr2 | 90490360 | 90490489 |
| chr2 | 90554010 | 90554120 |
| chr2 | 90565300 | 90565398 |
| chr2 | 90745275 | 90745393 |
| chr2 | 90918394 | 90918549 |
| chr2 | 91237003 | 91237143 |
| chr2 | 91387685 | 91387872 |
| chr2 | 91718472 | 91718599 |
| chr2 | 91962341 | 91962486 |
| chr2 | 92171153 | 92171233 |
| chr2 | 92375274 | 92375473 |
| chr2 | 92428057 | 92428167 |
| chr2 | 92438060 | 92438148 |
| chr2 | 92446795 | 92446915 |



|      |           |           |
|------|-----------|-----------|
| chr2 | 93445329  | 93445458  |
| chr2 | 93723439  | 93723731  |
| chr2 | 94157995  | 94158289  |
| chr2 | 98662236  | 98662965  |
| chr2 | 98665045  | 98665206  |
| chr2 | 98666237  | 98667328  |
| chr2 | 100433243 | 100433415 |
| chr2 | 102113408 | 102113549 |
| chr2 | 102745314 | 102745400 |
| chr2 | 102829374 | 102829458 |
| chr2 | 103073585 | 103073680 |
| chr2 | 103144397 | 103144612 |
| chr2 | 103285726 | 103285834 |
| chr2 | 103566210 | 103566372 |
| chr2 | 105055655 | 105055737 |
| chr2 | 109546940 | 109547023 |
| chr2 | 110073048 | 110073259 |
| chr2 | 110173830 | 110174000 |
| chr2 | 110192544 | 110192624 |
| chr2 | 110472463 | 110472634 |
| chr2 | 113440809 | 113441147 |
| chr2 | 113476492 | 113476626 |
| chr2 | 114090069 | 114090188 |
| chr2 | 115520505 | 115520715 |
| chr2 | 115984702 | 115984820 |
| chr2 | 117185708 | 117185858 |
| chr2 | 117780987 | 117781105 |
| chr2 | 117802812 | 117802958 |
| chr2 | 117804881 | 117804979 |
| chr2 | 117877786 | 117877940 |
| chr2 | 118168245 | 118168389 |
| chr2 | 118451154 | 118451249 |
| chr2 | 118549724 | 118549834 |
| chr2 | 119112503 | 119112587 |
| chr2 | 119167607 | 119167742 |
| chr2 | 119174311 | 119174402 |
| chr2 | 119618582 | 119618666 |
| chr2 | 120154648 | 120154824 |
| chr2 | 122118392 | 122118503 |
| chr2 | 122241986 | 122242098 |
| chr2 | 122658229 | 122658387 |
| chr2 | 122681952 | 122682029 |
| chr2 | 126961821 | 126961942 |
| chr2 | 127270041 | 127270193 |
| chr2 | 127625917 | 127626047 |

|      |           |           |
|------|-----------|-----------|
| chr2 | 127890700 | 127890838 |
| chr2 | 128103344 | 128103482 |
| chr2 | 128127377 | 128127577 |
| chr2 | 128174648 | 128174866 |
| chr2 | 128179881 | 128179955 |
| chr2 | 128544564 | 128544810 |
| chr2 | 128696649 | 128696726 |
| chr2 | 129232618 | 129232739 |
| chr2 | 129258246 | 129258322 |
| chr2 | 129297249 | 129297329 |
| chr2 | 130638434 | 130638686 |
| chr2 | 130760979 | 130761162 |
| chr2 | 130841015 | 130841137 |
| chr2 | 131176688 | 131176871 |
| chr2 | 131204568 | 131204647 |
| chr2 | 131210390 | 131210493 |
| chr2 | 131726693 | 131726789 |
| chr2 | 132262983 | 132263154 |
| chr2 | 132340398 | 132340532 |
| chr2 | 132698511 | 132698626 |
| chr2 | 132816081 | 132816174 |
| chr2 | 132922202 | 132922424 |
| chr2 | 132923769 | 132924081 |
| chr2 | 132939096 | 132939359 |
| chr2 | 133467347 | 133467426 |
| chr2 | 133511485 | 133511699 |
| chr2 | 133564529 | 133564655 |
| chr2 | 135093027 | 135093126 |
| chr2 | 135566114 | 135566187 |
| chr2 | 136891453 | 136891575 |
| chr2 | 138267963 | 138268045 |
| chr2 | 138274230 | 138274337 |
| chr2 | 138362603 | 138362732 |
| chr2 | 139873746 | 139874019 |
| chr2 | 140066815 | 140066903 |
| chr2 | 140759868 | 140759983 |
| chr2 | 140772896 | 140773029 |
| chr2 | 140790521 | 140790596 |
| chr2 | 141286080 | 141286303 |
| chr2 | 141286385 | 141286508 |
| chr2 | 144011303 | 144011489 |
| chr2 | 145832538 | 145832646 |
| chr2 | 146278554 | 146278854 |
| chr2 | 146512189 | 146512305 |
| chr2 | 147013816 | 147013890 |

|      |           |           |
|------|-----------|-----------|
| chr2 | 147968774 | 147968973 |
| chr2 | 150854945 | 150855130 |
| chr2 | 151002793 | 151002868 |
| chr2 | 151530373 | 151530475 |
| chr2 | 151563207 | 151563402 |
| chr2 | 152011856 | 152012055 |
| chr2 | 152739846 | 152739998 |
| chr2 | 152785670 | 152785750 |
| chr2 | 152820546 | 152820647 |
| chr2 | 153259202 | 153259403 |
| chr2 | 153435547 | 153435622 |
| chr2 | 154390231 | 154390534 |
| chr2 | 154436216 | 154436309 |
| chr2 | 154603708 | 154603964 |
| chr2 | 154656860 | 154656977 |
| chr2 | 154790687 | 154790770 |
| chr2 | 155517868 | 155517980 |
| chr2 | 155820001 | 155820175 |
| chr2 | 155826737 | 155826826 |
| chr2 | 155869808 | 155869945 |
| chr2 | 156007877 | 156008029 |
| chr2 | 156296228 | 156296345 |
| chr2 | 157360041 | 157360140 |
| chr2 | 157430797 | 157430922 |
| chr2 | 157759915 | 157760009 |
| chr2 | 158080618 | 158081052 |
| chr2 | 158178227 | 158178471 |
| chr2 | 158767862 | 158767984 |
| chr2 | 158857740 | 158857818 |
| chr2 | 160645682 | 160645928 |
| chr2 | 163494272 | 163494380 |
| chr2 | 163551629 | 163551712 |
| chr2 | 163552571 | 163552650 |
| chr2 | 163558983 | 163559087 |
| chr2 | 163564170 | 163564253 |
| chr2 | 163566177 | 163566332 |
| chr2 | 164737443 | 164737649 |
| chr2 | 164769703 | 164769859 |
| chr2 | 164804933 | 164805061 |
| chr2 | 165326547 | 165326664 |
| chr2 | 165497758 | 165497832 |
| chr2 | 165655272 | 165655365 |
| chr2 | 165922204 | 165922371 |
| chr2 | 165964177 | 165964371 |
| chr2 | 166122129 | 166122296 |

|      |           |           |
|------|-----------|-----------|
| chr2 | 168080564 | 168080645 |
| chr2 | 168104855 | 168105098 |
| chr2 | 168105453 | 168105528 |
| chr2 | 168525000 | 168525115 |
| chr2 | 168532272 | 168532365 |
| chr2 | 168734219 | 168734336 |
| chr2 | 170139701 | 170139797 |
| chr2 | 170209348 | 170209523 |
| chr2 | 172345392 | 172345489 |
| chr2 | 173023934 | 173024010 |
| chr2 | 173321295 | 173321396 |
| chr2 | 173647347 | 173647466 |
| chr2 | 173730393 | 173730654 |
| chr2 | 173749240 | 173749425 |
| chr2 | 174477655 | 174477848 |
| chr2 | 174660570 | 174660720 |
| chr2 | 174748463 | 174748596 |
| chr2 | 178471958 | 178472045 |
| chr2 | 180119079 | 180119213 |
| chr2 | 180123031 | 180123113 |
| chr2 | 180162485 | 180162581 |
| chr2 | 180170329 | 180170501 |
| chr2 | 180235121 | 180235204 |
| chr2 | 180257119 | 180257329 |
| chr2 | 180273514 | 180273662 |
| chr2 | 180276965 | 180277175 |
| chr2 | 180343207 | 180343408 |
| chr2 | 180456144 | 180456268 |
| chr2 | 180963036 | 180963237 |
| chr2 | 181187128 | 181187235 |
| chr2 | 181428261 | 181428399 |
| chr2 | 181497003 | 181497088 |
| chr2 | 181917429 | 181917530 |
| chr2 | 181917618 | 181918065 |
| chr2 | 181918610 | 181918684 |
| chr2 | 181929254 | 181929358 |
| chr2 | 181930877 | 181930982 |
| chr2 | 181931242 | 181931334 |
| chr2 | 182012756 | 182013201 |
| chr3 | 3503593   | 3503667   |
| chr3 | 5860344   | 5860808   |
| chr3 | 6094539   | 6094613   |
| chr3 | 8245311   | 8245411   |
| chr3 | 8245796   | 8245874   |
| chr3 | 8246253   | 8246547   |

|      |          |          |
|------|----------|----------|
| chr3 | 8866182  | 8866491  |
| chr3 | 8988646  | 8988820  |
| chr3 | 9249860  | 9249951  |
| chr3 | 9538649  | 9538747  |
| chr3 | 10283028 | 10283203 |
| chr3 | 10314672 | 10314794 |
| chr3 | 10335684 | 10335767 |
| chr3 | 13435484 | 13435601 |
| chr3 | 14948179 | 14948407 |
| chr3 | 15112295 | 15112562 |
| chr3 | 19169217 | 19169314 |
| chr3 | 19169427 | 19169531 |
| chr3 | 19188080 | 19188292 |
| chr3 | 19459241 | 19459354 |
| chr3 | 19707049 | 19707139 |
| chr3 | 19894700 | 19894778 |
| chr3 | 19978570 | 19978658 |
| chr3 | 21698447 | 21698529 |
| chr3 | 23843158 | 23843251 |
| chr3 | 24782858 | 24782959 |
| chr3 | 27153859 | 27153970 |
| chr3 | 27155045 | 27155201 |
| chr3 | 27228571 | 27228748 |
| chr3 | 27616626 | 27616717 |
| chr3 | 27652803 | 27652908 |
| chr3 | 27863544 | 27863688 |
| chr3 | 28026833 | 28027028 |
| chr3 | 28211522 | 28211645 |
| chr3 | 28215093 | 28215288 |
| chr3 | 28722139 | 28722252 |
| chr3 | 30019472 | 30019549 |
| chr3 | 30019646 | 30019781 |
| chr3 | 30048917 | 30049031 |
| chr3 | 30168552 | 30168631 |
| chr3 | 30189499 | 30189664 |
| chr3 | 31016839 | 31016959 |
| chr3 | 31023043 | 31023157 |
| chr3 | 32736838 | 32736990 |
| chr3 | 34985358 | 34985457 |
| chr3 | 35133577 | 35133995 |
| chr3 | 36150969 | 36151058 |
| chr3 | 36475729 | 36475909 |
| chr3 | 36520624 | 36520703 |
| chr3 | 36572096 | 36572265 |
| chr3 | 37158349 | 37158442 |

|      |          |          |
|------|----------|----------|
| chr3 | 37723341 | 37723493 |
| chr3 | 37907670 | 37907803 |
| chr3 | 38277023 | 38277119 |
| chr3 | 38277210 | 38277405 |
| chr3 | 38484990 | 38485157 |
| chr3 | 40846566 | 40846758 |
| chr3 | 40949456 | 40949595 |
| chr3 | 41083083 | 41083176 |
| chr3 | 41284977 | 41285056 |
| chr3 | 41375355 | 41375435 |
| chr3 | 50262147 | 50262235 |
| chr3 | 50456677 | 50456906 |
| chr3 | 51201063 | 51201170 |
| chr3 | 51326980 | 51327095 |
| chr3 | 51532336 | 51532484 |
| chr3 | 51660931 | 51661138 |
| chr3 | 52383565 | 52383659 |
| chr3 | 52464091 | 52464170 |
| chr3 | 52576676 | 52576955 |
| chr3 | 54692765 | 54692843 |
| chr3 | 55066228 | 55066370 |
| chr3 | 56118541 | 56118688 |
| chr3 | 56575649 | 56575726 |
| chr3 | 57277390 | 57277487 |
| chr3 | 57344288 | 57344443 |
| chr3 | 57637575 | 57637684 |
| chr3 | 57735959 | 57736096 |
| chr3 | 58372481 | 58372625 |
| chr3 | 60104872 | 60105016 |
| chr3 | 60267461 | 60267564 |
| chr3 | 60346398 | 60346579 |
| chr3 | 60486320 | 60486394 |
| chr3 | 62348682 | 62348841 |
| chr3 | 62454310 | 62454427 |
| chr3 | 63181995 | 63182071 |
| chr3 | 63454924 | 63455032 |
| chr3 | 63814339 | 63814420 |
| chr3 | 63837868 | 63837948 |
| chr3 | 64901472 | 64901699 |
| chr3 | 65392615 | 65392707 |
| chr3 | 65518266 | 65518395 |
| chr3 | 69026235 | 69026377 |
| chr3 | 69209108 | 69209279 |
| chr3 | 69222129 | 69222362 |
| chr3 | 69872786 | 69872968 |

|      |          |          |
|------|----------|----------|
| chr3 | 70314367 | 70314512 |
| chr3 | 73673349 | 73673706 |
| chr3 | 75499624 | 75499701 |
| chr3 | 75556916 | 75557129 |
| chr3 | 75952386 | 75952669 |
| chr3 | 75952812 | 75952899 |
| chr3 | 75956969 | 75957068 |
| chr3 | 79206695 | 79206806 |
| chr3 | 79628758 | 79629093 |
| chr3 | 81017710 | 81017873 |
| chr3 | 82357900 | 82358035 |
| chr3 | 82903937 | 82904075 |
| chr3 | 83124105 | 83124186 |
| chr3 | 83195100 | 83195295 |
| chr3 | 84231132 | 84231303 |
| chr3 | 84253640 | 84253732 |
| chr3 | 84429313 | 84429474 |
| chr3 | 84437140 | 84437214 |
| chr3 | 84639013 | 84639103 |
| chr3 | 84774379 | 84774647 |
| chr3 | 84800449 | 84800602 |
| chr3 | 84852953 | 84853035 |
| chr3 | 85022777 | 85023016 |
| chr3 | 85880751 | 85881031 |
| chr3 | 87508361 | 87508435 |
| chr3 | 87556736 | 87556817 |
| chr3 | 87761555 | 87761710 |
| chr3 | 87885575 | 87885897 |
| chr3 | 88049664 | 88049748 |
| chr3 | 88140283 | 88140389 |
| chr3 | 88296970 | 88297068 |
| chr3 | 88376333 | 88376414 |
| chr3 | 88425210 | 88425317 |
| chr3 | 88448638 | 88448718 |
| chr3 | 88471040 | 88471182 |
| chr3 | 88493073 | 88493162 |
| chr3 | 88510050 | 88510179 |
| chr3 | 88684295 | 88684469 |
| chr3 | 88685588 | 88685750 |
| chr3 | 88719244 | 88719345 |
| chr3 | 88746939 | 88747157 |
| chr3 | 89090153 | 89090238 |
| chr3 | 89101961 | 89102126 |
| chr3 | 89281273 | 89281375 |
| chr3 | 89418406 | 89418586 |

|      |          |          |
|------|----------|----------|
| chr3 | 89430195 | 89430286 |
| chr3 | 90081775 | 90081903 |
| chr3 | 90293014 | 90293192 |
| chr3 | 90433559 | 90433684 |
| chr3 | 92034153 | 92034253 |
| chr3 | 92211582 | 92211907 |
| chr3 | 92246285 | 92246668 |
| chr3 | 92250447 | 92250547 |
| chr3 | 92281077 | 92281464 |
| chr3 | 92285172 | 92285257 |
| chr3 | 92961028 | 92961192 |
| chr3 | 93380171 | 93380302 |
| chr3 | 93469703 | 93469880 |
| chr3 | 93506490 | 93506610 |
| chr3 | 93517601 | 93517698 |
| chr3 | 93522863 | 93522936 |
| chr3 | 93579463 | 93579641 |
| chr3 | 93938361 | 93938539 |
| chr3 | 94659400 | 94659484 |
| chr3 | 94680946 | 94681033 |
| chr3 | 94913881 | 94914062 |
| chr3 | 94953931 | 94954079 |
| chr3 | 95015552 | 95015721 |
| chr3 | 95016194 | 95016335 |
| chr3 | 95028771 | 95028857 |
| chr3 | 95434234 | 95434352 |
| chr3 | 95588718 | 95589008 |
| chr3 | 95624840 | 95624986 |
| chr3 | 95662445 | 95662598 |
| chr3 | 95674957 | 95675069 |
| chr3 | 95694113 | 95694199 |
| chr3 | 95702151 | 95702386 |
| chr3 | 95893813 | 95893894 |
| chr3 | 95929122 | 95929212 |
| chr3 | 96044627 | 96044858 |
| chr3 | 96161304 | 96161387 |
| chr3 | 96220931 | 96221011 |
| chr3 | 96239227 | 96239353 |
| chr3 | 96359821 | 96359901 |
| chr3 | 96575713 | 96575915 |
| chr3 | 96875094 | 96875169 |
| chr3 | 97658128 | 97658211 |
| chr3 | 97768013 | 97768277 |
| chr3 | 97844554 | 97844776 |
| chr3 | 98045115 | 98045216 |



|      |           |           |
|------|-----------|-----------|
| chr3 | 98267341  | 98267483  |
| chr3 | 98411008  | 98411094  |
| chr3 | 98932526  | 98932782  |
| chr3 | 100333637 | 100333718 |
| chr3 | 100821167 | 100821266 |
| chr3 | 100843891 | 100844009 |
| chr3 | 100922069 | 100922267 |
| chr3 | 100922352 | 100922447 |
| chr3 | 101112233 | 101112384 |
| chr3 | 101396149 | 101396432 |
| chr3 | 101411506 | 101411614 |
| chr3 | 101517181 | 101517463 |
| chr3 | 101518992 | 101519184 |
| chr3 | 101526722 | 101526888 |
| chr3 | 101709624 | 101709776 |
| chr3 | 103171580 | 103171670 |
| chr3 | 103802042 | 103802223 |
| chr3 | 104142567 | 104142644 |
| chr3 | 104220529 | 104220781 |
| chr3 | 104227511 | 104227585 |
| chr3 | 104289327 | 104289528 |
| chr3 | 104469603 | 104469715 |
| chr3 | 104573679 | 104573754 |
| chr3 | 104796472 | 104796701 |
| chr3 | 106721629 | 106721789 |
| chr3 | 107333136 | 107333333 |
| chr3 | 107844556 | 107844668 |
| chr3 | 107865437 | 107865600 |
| chr3 | 107873653 | 107873786 |
| chr3 | 107887728 | 107887839 |
| chr3 | 107931760 | 107931843 |
| chr3 | 107969199 | 107969321 |
| chr3 | 108017916 | 108018012 |
| chr3 | 108067760 | 108067844 |
| chr3 | 108256995 | 108257088 |
| chr3 | 108367922 | 108368068 |
| chr3 | 108722494 | 108722587 |
| chr3 | 109578405 | 109578551 |
| chr3 | 113629680 | 113629756 |
| chr3 | 116007358 | 116007456 |
| chr3 | 116414506 | 116414733 |
| chr3 | 116424122 | 116424205 |
| chr3 | 116425072 | 116425157 |
| chr3 | 116599855 | 116599961 |
| chr3 | 116950941 | 116951084 |

|      |           |           |
|------|-----------|-----------|
| chr3 | 117021968 | 117022146 |
| chr3 | 120861714 | 120861974 |
| chr3 | 121249820 | 121249951 |
| chr3 | 121291648 | 121291783 |
| chr3 | 121646517 | 121646993 |
| chr3 | 121854028 | 121854183 |
| chr3 | 122122306 | 122122381 |
| chr3 | 122199078 | 122199158 |
| chr3 | 122199282 | 122199395 |
| chr3 | 122482523 | 122482607 |
| chr3 | 122513103 | 122513274 |
| chr3 | 122620764 | 122620953 |
| chr3 | 122732249 | 122732367 |
| chr3 | 122805397 | 122805551 |
| chr3 | 122888427 | 122888562 |
| chr3 | 123053643 | 123053767 |
| chr3 | 123508601 | 123508674 |
| chr3 | 125884962 | 125885145 |
| chr3 | 125969490 | 125969738 |
| chr3 | 125986753 | 125986829 |
| chr3 | 125986913 | 125987011 |
| chr3 | 126609897 | 126609985 |
| chr3 | 126611889 | 126611974 |
| chr3 | 126661068 | 126661261 |
| chr3 | 127005282 | 127005487 |
| chr3 | 127851358 | 127851441 |
| chr3 | 127930038 | 127930148 |
| chr3 | 128210043 | 128210121 |
| chr3 | 128936726 | 128936799 |
| chr3 | 129536339 | 129536429 |
| chr3 | 129554712 | 129554798 |
| chr3 | 130833212 | 130833320 |
| chr3 | 130943464 | 130943562 |
| chr3 | 131485621 | 131485710 |
| chr3 | 131564679 | 131564762 |
| chr3 | 133235003 | 133235082 |
| chr3 | 135675152 | 135675289 |
| chr3 | 136948372 | 136948537 |
| chr3 | 138225828 | 138225995 |
| chr3 | 139024488 | 139024633 |
| chr3 | 139037135 | 139037314 |
| chr3 | 142348880 | 142349044 |
| chr3 | 142349420 | 142349547 |
| chr3 | 144144110 | 144144264 |
| chr3 | 144232183 | 144232270 |

|      |           |           |
|------|-----------|-----------|
| chr3 | 144570320 | 144570470 |
| chr3 | 144887158 | 144887247 |
| chr3 | 144960553 | 144960671 |
| chr3 | 144971740 | 144971820 |
| chr3 | 145118455 | 145118603 |
| chr3 | 145924015 | 145924096 |
| chr3 | 146284155 | 146284231 |
| chr3 | 146570233 | 146570387 |
| chr3 | 146876064 | 146876221 |
| chr3 | 149052785 | 149052859 |
| chr3 | 152308619 | 152308758 |
| chr3 | 153944468 | 153944817 |
| chr3 | 154696739 | 154696824 |
| chr3 | 154723237 | 154723384 |
| chr3 | 154810486 | 154810693 |
| chr3 | 157083357 | 157083438 |
| chr3 | 157925087 | 157925234 |
| chr3 | 157993408 | 157993626 |
| chr3 | 159939415 | 159939680 |
| chr4 | 5441594   | 5441688   |
| chr4 | 6239230   | 6239309   |
| chr4 | 6477305   | 6477514   |
| chr4 | 6914355   | 6914550   |
| chr4 | 6915005   | 6915115   |
| chr4 | 7144240   | 7144319   |
| chr4 | 7921660   | 7921747   |
| chr4 | 10953358  | 10953456  |
| chr4 | 10972674  | 10972874  |
| chr4 | 11099387  | 11099484  |
| chr4 | 11147652  | 11148090  |
| chr4 | 11237068  | 11237149  |
| chr4 | 11254232  | 11254321  |
| chr4 | 11447097  | 11447184  |
| chr4 | 11485867  | 11485952  |
| chr4 | 11653607  | 11653774  |
| chr4 | 11848308  | 11848440  |
| chr4 | 12009182  | 12009312  |
| chr4 | 12814802  | 12814917  |
| chr4 | 14826465  | 14826577  |
| chr4 | 14865544  | 14865742  |
| chr4 | 19883141  | 19883251  |
| chr4 | 19925704  | 19925899  |
| chr4 | 20191844  | 20191953  |
| chr4 | 28176920  | 28177016  |
| chr4 | 31354190  | 31354264  |

|      |          |          |
|------|----------|----------|
| chr4 | 32615328 | 32615439 |
| chr4 | 33261461 | 33261563 |
| chr4 | 35012975 | 35013168 |
| chr4 | 35113619 | 35113797 |
| chr4 | 35155566 | 35155699 |
| chr4 | 35175704 | 35175844 |
| chr4 | 35203844 | 35204069 |
| chr4 | 40142914 | 40143068 |
| chr4 | 40702783 | 40702900 |
| chr4 | 40837461 | 40837595 |
| chr4 | 41569537 | 41569681 |
| chr4 | 42949560 | 42949711 |
| chr4 | 43000609 | 43000747 |
| chr4 | 43040391 | 43040518 |
| chr4 | 43656552 | 43656712 |
| chr4 | 44042542 | 44042628 |
| chr4 | 44067011 | 44067131 |
| chr4 | 44094628 | 44094774 |
| chr4 | 44217161 | 44217235 |
| chr4 | 44981335 | 44981451 |
| chr4 | 45012393 | 45012773 |
| chr4 | 45035418 | 45035504 |
| chr4 | 45510306 | 45510519 |
| chr4 | 45531279 | 45531443 |
| chr4 | 45965779 | 45966020 |
| chr4 | 47353069 | 47353174 |
| chr4 | 47936543 | 47936715 |
| chr4 | 53316236 | 53316309 |
| chr4 | 53436617 | 53436827 |
| chr4 | 54973283 | 54973380 |
| chr4 | 55127421 | 55127511 |
| chr4 | 56069045 | 56069127 |
| chr4 | 56499899 | 56500092 |
| chr4 | 56506236 | 56506403 |
| chr4 | 56533526 | 56533819 |
| chr4 | 56639363 | 56639446 |
| chr4 | 56768122 | 56768201 |
| chr4 | 56957706 | 56957812 |
| chr4 | 57129806 | 57129907 |
| chr4 | 57139572 | 57139821 |
| chr4 | 57186125 | 57186314 |
| chr4 | 57606453 | 57606601 |
| chr4 | 57798477 | 57798596 |
| chr4 | 57815473 | 57815660 |
| chr4 | 57845075 | 57845224 |

|      |          |          |
|------|----------|----------|
| chr4 | 57956492 | 57956596 |
| chr4 | 58714335 | 58714485 |
| chr4 | 58722802 | 58722970 |
| chr4 | 58745677 | 58745751 |
| chr4 | 58997712 | 58997808 |
| chr4 | 59118015 | 59118508 |
| chr4 | 59239520 | 59239596 |
| chr4 | 59262310 | 59262516 |
| chr4 | 59552981 | 59553111 |
| chr4 | 59717630 | 59717797 |
| chr4 | 61855889 | 61855973 |
| chr4 | 62360547 | 62360656 |
| chr4 | 62525404 | 62525481 |
| chr4 | 62666046 | 62666131 |
| chr4 | 63157044 | 63157336 |
| chr4 | 63186371 | 63186738 |
| chr4 | 63561929 | 63562012 |
| chr4 | 63718189 | 63718479 |
| chr4 | 64497853 | 64498058 |
| chr4 | 70378117 | 70378252 |
| chr4 | 70841412 | 70841576 |
| chr4 | 72199015 | 72199162 |
| chr4 | 72946720 | 72946887 |
| chr4 | 73047850 | 73048061 |
| chr4 | 76424877 | 76425194 |
| chr4 | 77310528 | 77310656 |
| chr4 | 80002902 | 80002991 |
| chr4 | 80003893 | 80003976 |
| chr4 | 80922232 | 80922331 |
| chr4 | 80949750 | 80950001 |
| chr4 | 82447090 | 82447209 |
| chr4 | 82510933 | 82511148 |
| chr4 | 82542354 | 82542477 |
| chr4 | 84184878 | 84185106 |
| chr4 | 86612093 | 86612243 |
| chr4 | 86626545 | 86626812 |
| chr4 | 86656498 | 86656573 |
| chr4 | 86725305 | 86725406 |
| chr4 | 87815813 | 87815893 |
| chr4 | 87838198 | 87838290 |
| chr4 | 87881676 | 87881790 |
| chr4 | 87984686 | 87984847 |
| chr4 | 88155449 | 88155676 |
| chr4 | 89445192 | 89445370 |
| chr4 | 93844417 | 93844497 |

|      |           |           |
|------|-----------|-----------|
| chr4 | 95052301  | 95052400  |
| chr4 | 95435112  | 95435260  |
| chr4 | 95637439  | 95637588  |
| chr4 | 95759486  | 95759664  |
| chr4 | 95795629  | 95795756  |
| chr4 | 95939061  | 95939158  |
| chr4 | 96568008  | 96568256  |
| chr4 | 97466133  | 97466270  |
| chr4 | 97773303  | 97773415  |
| chr4 | 97868473  | 97868559  |
| chr4 | 98004317  | 98004505  |
| chr4 | 98923253  | 98923478  |
| chr4 | 99115759  | 99115964  |
| chr4 | 99141318  | 99141395  |
| chr4 | 100008489 | 100008678 |
| chr4 | 100740280 | 100740375 |
| chr4 | 100793247 | 100793457 |
| chr4 | 101265341 | 101265430 |
| chr4 | 101292014 | 101292088 |
| chr4 | 101393288 | 101393458 |
| chr4 | 102533322 | 102533426 |
| chr4 | 104823710 | 104823785 |
| chr4 | 105309103 | 105309213 |
| chr4 | 105364715 | 105364799 |
| chr4 | 106559415 | 106559549 |
| chr4 | 106559707 | 106559925 |
| chr4 | 106582536 | 106583031 |
| chr4 | 106772686 | 106772787 |
| chr4 | 106981802 | 106981975 |
| chr4 | 107253736 | 107253833 |
| chr4 | 107302967 | 107303106 |
| chr4 | 107803770 | 107803949 |
| chr4 | 108071320 | 108071484 |
| chr4 | 108362759 | 108362952 |
| chr4 | 108391217 | 108391421 |
| chr4 | 108619617 | 108619707 |
| chr4 | 108842147 | 108842227 |
| chr4 | 109000532 | 109000657 |
| chr4 | 109202263 | 109202391 |
| chr4 | 111737616 | 111737841 |
| chr4 | 114999914 | 115000046 |
| chr4 | 115264738 | 115264844 |
| chr4 | 115278543 | 115278658 |
| chr4 | 115521994 | 115522076 |
| chr4 | 115659291 | 115659505 |

|      |           |           |
|------|-----------|-----------|
| chr4 | 115768037 | 115768153 |
| chr4 | 116077468 | 116077558 |
| chr4 | 116470764 | 116470860 |
| chr4 | 116557538 | 116557637 |
| chr4 | 116672701 | 116672985 |
| chr4 | 116720657 | 116720829 |
| chr4 | 116807588 | 116807690 |
| chr4 | 117136110 | 117136400 |
| chr4 | 117247047 | 117247185 |
| chr4 | 117550291 | 117550366 |
| chr4 | 117974961 | 117975124 |
| chr4 | 117997755 | 117997839 |
| chr4 | 118179651 | 118179740 |
| chr4 | 118180021 | 118180211 |
| chr4 | 118240404 | 118240573 |
| chr4 | 118516866 | 118516990 |
| chr4 | 118547856 | 118548109 |
| chr4 | 118548209 | 118548362 |
| chr4 | 118548605 | 118548724 |
| chr4 | 119232747 | 119232855 |
| chr4 | 119285514 | 119285682 |
| chr4 | 119599776 | 119599850 |
| chr4 | 119733599 | 119733672 |
| chr4 | 120516553 | 120516787 |
| chr4 | 120615672 | 120615769 |
| chr4 | 120616725 | 120616952 |
| chr4 | 120666422 | 120666543 |
| chr4 | 120689424 | 120689655 |
| chr4 | 122885953 | 122886230 |
| chr4 | 123005768 | 123005854 |
| chr4 | 123048540 | 123048740 |
| chr4 | 123183373 | 123183463 |
| chr4 | 123589176 | 123589383 |
| chr4 | 123613663 | 123613889 |
| chr4 | 123904801 | 123904890 |
| chr4 | 123917345 | 123917443 |
| chr4 | 124751447 | 124751560 |
| chr4 | 125029945 | 125030030 |
| chr4 | 125637051 | 125637202 |
| chr4 | 126046860 | 126046951 |
| chr4 | 126162768 | 126162867 |
| chr4 | 126754800 | 126754957 |
| chr4 | 126762746 | 126762873 |
| chr4 | 126872867 | 126872961 |
| chr4 | 126879679 | 126879792 |

|      |           |           |
|------|-----------|-----------|
| chr4 | 127021074 | 127021287 |
| chr4 | 128610097 | 128610188 |
| chr4 | 128649051 | 128649164 |
| chr4 | 128809026 | 128809146 |
| chr4 | 129000954 | 129001082 |
| chr4 | 129107611 | 129107788 |
| chr4 | 129251215 | 129251340 |
| chr4 | 129335371 | 129335473 |
| chr4 | 129410795 | 129410941 |
| chr4 | 129461479 | 129461593 |
| chr4 | 129542687 | 129542829 |
| chr4 | 129742343 | 129742432 |
| chr4 | 129819944 | 129820032 |
| chr4 | 129957741 | 129957842 |
| chr4 | 130131088 | 130131206 |
| chr4 | 130520079 | 130520422 |
| chr4 | 130637719 | 130637914 |
| chr4 | 130915437 | 130915600 |
| chr4 | 131897959 | 131898124 |
| chr4 | 132076825 | 132076989 |
| chr4 | 132269855 | 132270016 |
| chr4 | 132421939 | 132422063 |
| chr4 | 132474774 | 132474937 |
| chr4 | 132484929 | 132485068 |
| chr4 | 132515572 | 132515695 |
| chr4 | 132610416 | 132610556 |
| chr4 | 132874426 | 132874556 |
| chr4 | 132922596 | 132922683 |
| chr4 | 133339422 | 133339498 |
| chr4 | 133614391 | 133614518 |
| chr4 | 133813217 | 133813375 |
| chr4 | 133879082 | 133879468 |
| chr4 | 134081911 | 134082047 |
| chr4 | 134187130 | 134187219 |
| chr4 | 134238337 | 134238511 |
| chr4 | 134396188 | 134396287 |
| chr4 | 134397144 | 134397479 |
| chr4 | 134482719 | 134482856 |
| chr4 | 134510852 | 134510994 |
| chr4 | 134726063 | 134726144 |
| chr4 | 135676625 | 135676767 |
| chr4 | 135964609 | 135964704 |
| chr4 | 136123522 | 136123629 |
| chr4 | 136256054 | 136256197 |
| chr4 | 136302620 | 136302759 |



|      |           |           |
|------|-----------|-----------|
| chr4 | 136450352 | 136450483 |
| chr4 | 136451808 | 136451910 |
| chr4 | 136462178 | 136462252 |
| chr4 | 137121839 | 137121939 |
| chr4 | 137704798 | 137704907 |
| chr4 | 137858544 | 137858622 |
| chr4 | 138068759 | 138068845 |
| chr4 | 138304531 | 138304646 |
| chr4 | 138325589 | 138325716 |
| chr4 | 138378498 | 138378574 |
| chr4 | 138737189 | 138737268 |
| chr4 | 138772180 | 138772275 |
| chr4 | 138972254 | 138972352 |
| chr4 | 139179933 | 139180199 |
| chr4 | 139185894 | 139186041 |
| chr4 | 139335033 | 139335160 |
| chr4 | 139380430 | 139380519 |
| chr4 | 139509218 | 139509365 |
| chr4 | 139535138 | 139535515 |
| chr4 | 139574321 | 139574591 |
| chr4 | 139587942 | 139588025 |
| chr4 | 139622734 | 139622810 |
| chr4 | 139797531 | 139797610 |
| chr4 | 140604661 | 140604761 |
| chr4 | 140961203 | 140961298 |
| chr4 | 141131536 | 141131801 |
| chr4 | 141240647 | 141240877 |
| chr4 | 141278296 | 141278374 |
| chr4 | 141514352 | 141514451 |
| chr4 | 141538773 | 141538978 |
| chr4 | 141545993 | 141546093 |
| chr4 | 141560005 | 141560109 |
| chr4 | 141573714 | 141573846 |
| chr4 | 141578920 | 141579035 |
| chr4 | 141731907 | 141732048 |
| chr4 | 141878786 | 141878863 |
| chr4 | 141929046 | 141929222 |
| chr4 | 141999666 | 141999884 |
| chr4 | 147868574 | 147868776 |
| chr4 | 148050612 | 148050723 |
| chr4 | 148448402 | 148448504 |
| chr4 | 148589741 | 148589871 |
| chr4 | 148820319 | 148820443 |
| chr4 | 149166662 | 149166757 |
| chr4 | 149392510 | 149392784 |

|              |           |           |
|--------------|-----------|-----------|
| chr4         | 149813669 | 149813781 |
| chr4         | 149820584 | 149820802 |
| chr4         | 150133022 | 150133150 |
| chr4         | 150192428 | 150192502 |
| chr4         | 150237019 | 150237106 |
| chr4         | 150240148 | 150240256 |
| chr4         | 150362392 | 150362529 |
| chr4         | 150493808 | 150493907 |
| chr4         | 150504762 | 150504879 |
| chr4         | 150517590 | 150517679 |
| chr4         | 150576393 | 150576489 |
| chr4         | 150685370 | 150685608 |
| chr4         | 150748267 | 150748408 |
| chr4         | 150798972 | 150799087 |
| chr4         | 151044713 | 151044817 |
| chr4         | 151861879 | 151862106 |
| chr4         | 152199666 | 152199833 |
| chr4         | 153153053 | 153153176 |
| chr4         | 154160719 | 154160891 |
| chr4         | 154294225 | 154294494 |
| chr4         | 154359933 | 154360059 |
| chr4         | 154418372 | 154418727 |
| chr4         | 154592677 | 154592782 |
| chr4         | 154699376 | 154699537 |
| chr4         | 154899167 | 154899242 |
| chr4         | 155120839 | 155120940 |
| chr4         | 155213960 | 155214061 |
| chr4         | 155361485 | 155361577 |
| chr4         | 155582423 | 155582627 |
| chr4         | 155636182 | 155636406 |
| chr4         | 155643644 | 155643783 |
| chr4         | 155687843 | 155688010 |
| chr4         | 155761141 | 155761265 |
| chr4         | 156109728 | 156109868 |
| chr4_GL4562: | 17129     | 17226     |
| chr4_GL4562: | 49122     | 49345     |
| chr5         | 3596139   | 3596215   |
| chr5         | 3939090   | 3939208   |
| chr5         | 4004899   | 4005095   |
| chr5         | 4019415   | 4019591   |
| chr5         | 5648887   | 5649055   |
| chr5         | 8045960   | 8046112   |
| chr5         | 8623120   | 8623208   |
| chr5         | 9028359   | 9028728   |
| chr5         | 9057564   | 9057659   |

|      |          |          |
|------|----------|----------|
| chr5 | 9069072  | 9069190  |
| chr5 | 10189703 | 10189792 |
| chr5 | 12956834 | 12956983 |
| chr5 | 14198907 | 14199010 |
| chr5 | 15054466 | 15054540 |
| chr5 | 15734158 | 15734251 |
| chr5 | 15734326 | 15734414 |
| chr5 | 15846941 | 15847116 |
| chr5 | 17296608 | 17296720 |
| chr5 | 17571694 | 17571918 |
| chr5 | 20882182 | 20882418 |
| chr5 | 20947131 | 20947223 |
| chr5 | 20951849 | 20951955 |
| chr5 | 21056161 | 21056243 |
| chr5 | 21424763 | 21424953 |
| chr5 | 21545389 | 21545529 |
| chr5 | 21673416 | 21673597 |
| chr5 | 21694907 | 21695109 |
| chr5 | 23518774 | 23518945 |
| chr5 | 24968983 | 24969085 |
| chr5 | 25030158 | 25030275 |
| chr5 | 25529546 | 25529740 |
| chr5 | 27659987 | 27660102 |
| chr5 | 28055480 | 28055694 |
| chr5 | 28207613 | 28207696 |
| chr5 | 28302859 | 28302957 |
| chr5 | 29200048 | 29200172 |
| chr5 | 29463321 | 29463495 |
| chr5 | 29698507 | 29698592 |
| chr5 | 29708489 | 29708622 |
| chr5 | 29861636 | 29861746 |
| chr5 | 30232385 | 30232596 |
| chr5 | 30242568 | 30242650 |
| chr5 | 30279537 | 30279624 |
| chr5 | 31291144 | 31291262 |
| chr5 | 31494642 | 31494718 |
| chr5 | 31713316 | 31713448 |
| chr5 | 31936105 | 31936249 |
| chr5 | 31968022 | 31968340 |
| chr5 | 32725506 | 32725593 |
| chr5 | 34169558 | 34169744 |
| chr5 | 34187799 | 34188013 |
| chr5 | 35021021 | 35021102 |
| chr5 | 35041478 | 35041551 |
| chr5 | 35718032 | 35718131 |

|      |          |          |
|------|----------|----------|
| chr5 | 36075209 | 36075293 |
| chr5 | 36378048 | 36378238 |
| chr5 | 36390445 | 36390631 |
| chr5 | 36581923 | 36582083 |
| chr5 | 36630514 | 36630762 |
| chr5 | 36660929 | 36661189 |
| chr5 | 36713053 | 36713282 |
| chr5 | 36989023 | 36989373 |
| chr5 | 37650984 | 37651113 |
| chr5 | 37700147 | 37700286 |
| chr5 | 38117180 | 38117266 |
| chr5 | 39658672 | 39658813 |
| chr5 | 39716293 | 39716420 |
| chr5 | 39762151 | 39762249 |
| chr5 | 39828929 | 39829097 |
| chr5 | 41904557 | 41904871 |
| chr5 | 42155730 | 42155858 |
| chr5 | 43024217 | 43024290 |
| chr5 | 43810584 | 43810891 |
| chr5 | 43948095 | 43948388 |
| chr5 | 43998464 | 43998542 |
| chr5 | 44113168 | 44113460 |
| chr5 | 44151571 | 44151673 |
| chr5 | 44338758 | 44338926 |
| chr5 | 45450294 | 45450588 |
| chr5 | 45904803 | 45904955 |
| chr5 | 46182300 | 46182388 |
| chr5 | 46445942 | 46446033 |
| chr5 | 46578622 | 46578885 |
| chr5 | 49990885 | 49991058 |
| chr5 | 50059699 | 50059793 |
| chr5 | 50291044 | 50291242 |
| chr5 | 51391399 | 51391506 |
| chr5 | 52625050 | 52625165 |
| chr5 | 52670706 | 52670840 |
| chr5 | 52833792 | 52833943 |
| chr5 | 52913894 | 52913972 |
| chr5 | 53196495 | 53196728 |
| chr5 | 53242053 | 53242136 |
| chr5 | 60042835 | 60043056 |
| chr5 | 62716526 | 62716755 |
| chr5 | 63755258 | 63755459 |
| chr5 | 63816756 | 63816883 |
| chr5 | 63817141 | 63817246 |
| chr5 | 63874866 | 63875041 |

|      |          |          |
|------|----------|----------|
| chr5 | 63936910 | 63937015 |
| chr5 | 64065863 | 64065962 |
| chr5 | 64112432 | 64112571 |
| chr5 | 64233089 | 64233166 |
| chr5 | 64242898 | 64242990 |
| chr5 | 64345291 | 64345563 |
| chr5 | 64389415 | 64389534 |
| chr5 | 64580381 | 64580465 |
| chr5 | 64710306 | 64710523 |
| chr5 | 64861866 | 64862072 |
| chr5 | 64864931 | 64865077 |
| chr5 | 65107423 | 65107506 |
| chr5 | 65435701 | 65436038 |
| chr5 | 65499138 | 65499343 |
| chr5 | 65711541 | 65711617 |
| chr5 | 66043986 | 66044173 |
| chr5 | 66052774 | 66052900 |
| chr5 | 66054539 | 66054694 |
| chr5 | 66080950 | 66081089 |
| chr5 | 66088398 | 66088478 |
| chr5 | 66098256 | 66098348 |
| chr5 | 66504074 | 66504253 |
| chr5 | 66922631 | 66922710 |
| chr5 | 67797534 | 67797615 |
| chr5 | 67931830 | 67931928 |
| chr5 | 67990512 | 67990613 |
| chr5 | 68578600 | 68578750 |
| chr5 | 72250120 | 72250247 |
| chr5 | 72656518 | 72656691 |
| chr5 | 72855740 | 72855862 |
| chr5 | 73103793 | 73103875 |
| chr5 | 73168860 | 73168956 |
| chr5 | 73490874 | 73490974 |
| chr5 | 73539093 | 73539237 |
| chr5 | 73566161 | 73566424 |
| chr5 | 73566934 | 73567045 |
| chr5 | 73630258 | 73630487 |
| chr5 | 73782772 | 73782845 |
| chr5 | 74062360 | 74062499 |
| chr5 | 74093008 | 74093092 |
| chr5 | 74137016 | 74137120 |
| chr5 | 74702903 | 74703028 |
| chr5 | 74738388 | 74738598 |
| chr5 | 74793573 | 74793673 |
| chr5 | 75253942 | 75254114 |

|      |          |          |
|------|----------|----------|
| chr5 | 76154752 | 76154930 |
| chr5 | 76306401 | 76306503 |
| chr5 | 76327400 | 76327482 |
| chr5 | 76437223 | 76437397 |
| chr5 | 76816193 | 76816310 |
| chr5 | 76816883 | 76817015 |
| chr5 | 76951171 | 76951281 |
| chr5 | 77107179 | 77107437 |
| chr5 | 81225547 | 81225649 |
| chr5 | 81940935 | 81941042 |
| chr5 | 87103921 | 87104016 |
| chr5 | 87536094 | 87536279 |
| chr5 | 87568976 | 87569081 |
| chr5 | 88764975 | 88765101 |
| chr5 | 88821728 | 88821851 |
| chr5 | 89176924 | 89177010 |
| chr5 | 89218241 | 89218348 |
| chr5 | 89277693 | 89277828 |
| chr5 | 89278383 | 89278506 |
| chr5 | 90223972 | 90224053 |
| chr5 | 90611715 | 90611804 |
| chr5 | 90612092 | 90612213 |
| chr5 | 90621857 | 90622022 |
| chr5 | 90641388 | 90641466 |
| chr5 | 90661496 | 90661569 |
| chr5 | 90877174 | 90877343 |
| chr5 | 91098381 | 91098508 |
| chr5 | 91110425 | 91110503 |
| chr5 | 91641090 | 91641347 |
| chr5 | 91727562 | 91727746 |
| chr5 | 91739720 | 91739915 |
| chr5 | 92204251 | 92204457 |
| chr5 | 92348949 | 92349058 |
| chr5 | 92489187 | 92489267 |
| chr5 | 92745852 | 92746059 |
| chr5 | 92880493 | 92880738 |
| chr5 | 92925284 | 92925395 |
| chr5 | 92961849 | 92962134 |
| chr5 | 92985564 | 92985670 |
| chr5 | 93024746 | 93024912 |
| chr5 | 93267066 | 93267180 |
| chr5 | 93296794 | 93297068 |
| chr5 | 97111625 | 97111808 |
| chr5 | 97236937 | 97237025 |
| chr5 | 97304967 | 97305071 |

|      |           |           |
|------|-----------|-----------|
| chr5 | 98376579  | 98376682  |
| chr5 | 98757323  | 98757406  |
| chr5 | 98863122  | 98863258  |
| chr5 | 99128720  | 99128831  |
| chr5 | 99236556  | 99236657  |
| chr5 | 99237430  | 99237503  |
| chr5 | 99242188  | 99242375  |
| chr5 | 99284611  | 99284724  |
| chr5 | 99526948  | 99527185  |
| chr5 | 100006469 | 100006673 |
| chr5 | 100518193 | 100518270 |
| chr5 | 100548404 | 100548525 |
| chr5 | 101163855 | 101163931 |
| chr5 | 101700700 | 101700841 |
| chr5 | 103194014 | 103194087 |
| chr5 | 103737832 | 103737980 |
| chr5 | 103798496 | 103798651 |
| chr5 | 103977377 | 103977553 |
| chr5 | 104021908 | 104021983 |
| chr5 | 104187422 | 104187506 |
| chr5 | 105439741 | 105439904 |
| chr5 | 105681061 | 105681213 |
| chr5 | 110448593 | 110448901 |
| chr5 | 112276507 | 112276587 |
| chr5 | 113165110 | 113165219 |
| chr5 | 114041618 | 114041797 |
| chr5 | 114357113 | 114357189 |
| chr5 | 114444095 | 114444238 |
| chr5 | 114561174 | 114561271 |
| chr5 | 114965397 | 114965508 |
| chr5 | 115155823 | 115155988 |
| chr5 | 115158300 | 115158419 |
| chr5 | 115652876 | 115653099 |
| chr5 | 115971340 | 115971758 |
| chr5 | 117160580 | 117160850 |
| chr5 | 117182733 | 117182905 |
| chr5 | 117279227 | 117279509 |
| chr5 | 117287613 | 117287767 |
| chr5 | 117360916 | 117361016 |
| chr5 | 118245149 | 118245222 |
| chr5 | 118449363 | 118449483 |
| chr5 | 118504337 | 118504474 |
| chr5 | 118985028 | 118985227 |
| chr5 | 120466080 | 120466164 |
| chr5 | 120471701 | 120471883 |

|      |           |           |
|------|-----------|-----------|
| chr5 | 120588902 | 120588989 |
| chr5 | 121566202 | 121566344 |
| chr5 | 122527031 | 122527189 |
| chr5 | 122821316 | 122821404 |
| chr5 | 122850078 | 122850157 |
| chr5 | 122920725 | 122920801 |
| chr5 | 123035761 | 123035981 |
| chr5 | 123057971 | 123058050 |
| chr5 | 123749489 | 123749581 |
| chr5 | 124004735 | 124005039 |
| chr5 | 124007141 | 124007221 |
| chr5 | 124047146 | 124047275 |
| chr5 | 124076638 | 124076758 |
| chr5 | 124092137 | 124092219 |
| chr5 | 124327900 | 124328021 |
| chr5 | 125081266 | 125081395 |
| chr5 | 125134954 | 125135040 |
| chr5 | 125393300 | 125393510 |
| chr5 | 129887353 | 129887509 |
| chr5 | 129941695 | 129941848 |
| chr5 | 130144789 | 130144937 |
| chr5 | 130192553 | 130192696 |
| chr5 | 131573576 | 131573756 |
| chr5 | 131600538 | 131600747 |
| chr5 | 131613375 | 131613492 |
| chr5 | 131814394 | 131814615 |
| chr5 | 131960476 | 131960550 |
| chr5 | 134418475 | 134418652 |
| chr5 | 134688788 | 134688871 |
| chr5 | 134688947 | 134689024 |
| chr5 | 134959315 | 134959427 |
| chr5 | 134966631 | 134966729 |
| chr5 | 135001337 | 135001580 |
| chr5 | 135002373 | 135002506 |
| chr5 | 135008951 | 135009079 |
| chr5 | 135149433 | 135149571 |
| chr5 | 135187148 | 135187223 |
| chr5 | 135545423 | 135545558 |
| chr5 | 135674545 | 135674627 |
| chr5 | 135957731 | 135957876 |
| chr5 | 135962698 | 135962842 |
| chr5 | 136083858 | 136083953 |
| chr5 | 136288526 | 136288697 |
| chr5 | 136710857 | 136710937 |
| chr5 | 136953127 | 136953231 |



|      |           |           |
|------|-----------|-----------|
| chr5 | 137152257 | 137152429 |
| chr5 | 137345981 | 137346136 |
| chr5 | 137601060 | 137601171 |
| chr5 | 137628666 | 137628858 |
| chr5 | 137630323 | 137630404 |
| chr5 | 137684757 | 137684944 |
| chr5 | 137921684 | 137921849 |
| chr5 | 138171074 | 138171159 |
| chr5 | 138171914 | 138172039 |
| chr5 | 138280156 | 138280247 |
| chr5 | 138687555 | 138687714 |
| chr5 | 138754888 | 138755014 |
| chr5 | 138846564 | 138846682 |
| chr5 | 139149868 | 139150133 |
| chr5 | 139317476 | 139317665 |
| chr5 | 140283148 | 140283382 |
| chr5 | 140611234 | 140611546 |
| chr5 | 140704944 | 140705077 |
| chr5 | 140830527 | 140830763 |
| chr5 | 142782479 | 142782699 |
| chr5 | 142909846 | 142909988 |
| chr5 | 142920994 | 142921085 |
| chr5 | 143400644 | 143400792 |
| chr5 | 143732414 | 143732487 |
| chr5 | 143817625 | 143817800 |
| chr5 | 143909849 | 143909995 |
| chr5 | 144086408 | 144086848 |
| chr5 | 144098368 | 144098454 |
| chr5 | 144296302 | 144296395 |
| chr5 | 144317553 | 144317669 |
| chr5 | 144341141 | 144341506 |
| chr5 | 144352422 | 144352506 |
| chr5 | 144358300 | 144358388 |
| chr5 | 144358490 | 144358604 |
| chr5 | 144978763 | 144978855 |
| chr5 | 145204198 | 145204458 |
| chr5 | 145464430 | 145464525 |
| chr5 | 145464793 | 145464875 |
| chr5 | 145562725 | 145562984 |
| chr5 | 145579461 | 145579537 |
| chr5 | 145628083 | 145628279 |
| chr5 | 145698115 | 145698392 |
| chr5 | 145714834 | 145714965 |
| chr5 | 145778008 | 145778125 |
| chr5 | 145858699 | 145859067 |

|      |           |           |
|------|-----------|-----------|
| chr5 | 145881269 | 145881453 |
| chr5 | 146078952 | 146079033 |
| chr5 | 146260994 | 146261348 |
| chr5 | 146315343 | 146315559 |
| chr5 | 146688004 | 146688135 |
| chr5 | 147076517 | 147076697 |
| chr5 | 147247288 | 147247373 |
| chr5 | 147269967 | 147270067 |
| chr5 | 147299712 | 147299885 |
| chr5 | 147907997 | 147908094 |
| chr5 | 148708140 | 148708217 |
| chr5 | 148741164 | 148741252 |
| chr5 | 148789331 | 148789480 |
| chr5 | 148978437 | 148978594 |
| chr5 | 149053039 | 149053113 |
| chr5 | 149323034 | 149323108 |
| chr5 | 150333331 | 150333431 |
| chr5 | 150665641 | 150665835 |
| chr5 | 151176185 | 151176283 |
| chr5 | 151734557 | 151734684 |
| chr6 | 3200867   | 3201568   |
| chr6 | 4982719   | 4982929   |
| chr6 | 7120306   | 7120389   |
| chr6 | 8259215   | 8259296   |
| chr6 | 8509204   | 8509394   |
| chr6 | 8695061   | 8695285   |
| chr6 | 8752962   | 8753240   |
| chr6 | 9889946   | 9890153   |
| chr6 | 12813988  | 12814063  |
| chr6 | 13052463  | 13052671  |
| chr6 | 13677994  | 13678090  |
| chr6 | 16340602  | 16340711  |
| chr6 | 16891852  | 16891936  |
| chr6 | 17051644  | 17051839  |
| chr6 | 17053131  | 17053311  |
| chr6 | 17129458  | 17129595  |
| chr6 | 17171329  | 17171519  |
| chr6 | 17554863  | 17554959  |
| chr6 | 17559790  | 17559901  |
| chr6 | 18097048  | 18097157  |
| chr6 | 18248253  | 18248368  |
| chr6 | 21949369  | 21949442  |
| chr6 | 22467571  | 22467748  |
| chr6 | 24262619  | 24262817  |
| chr6 | 24527646  | 24527752  |

|      |          |          |
|------|----------|----------|
| chr6 | 27265009 | 27265094 |
| chr6 | 28421599 | 28421726 |
| chr6 | 28480200 | 28480340 |
| chr6 | 28713418 | 28713499 |
| chr6 | 29693978 | 29694054 |
| chr6 | 30855409 | 30855496 |
| chr6 | 30896785 | 30896872 |
| chr6 | 31061816 | 31062121 |
| chr6 | 31067580 | 31067767 |
| chr6 | 31075747 | 31075852 |
| chr6 | 31165077 | 31165335 |
| chr6 | 31776970 | 31777048 |
| chr6 | 33060271 | 33060465 |
| chr6 | 33380656 | 33380786 |
| chr6 | 34240011 | 34240116 |
| chr6 | 34476088 | 34476169 |
| chr6 | 34579625 | 34579800 |
| chr6 | 34865947 | 34866025 |
| chr6 | 37442149 | 37442518 |
| chr6 | 38122990 | 38123102 |
| chr6 | 38374347 | 38374564 |
| chr6 | 38753849 | 38753999 |
| chr6 | 38992041 | 38992118 |
| chr6 | 39205331 | 39205436 |
| chr6 | 39243282 | 39243607 |
| chr6 | 39264788 | 39265002 |
| chr6 | 40237472 | 40237564 |
| chr6 | 40431444 | 40431590 |
| chr6 | 40626292 | 40626387 |
| chr6 | 40635668 | 40635782 |
| chr6 | 40784506 | 40784773 |
| chr6 | 42245872 | 42245952 |
| chr6 | 43337713 | 43337788 |
| chr6 | 43666333 | 43666450 |
| chr6 | 43851494 | 43851577 |
| chr6 | 44792941 | 44793054 |
| chr6 | 45518277 | 45518452 |
| chr6 | 47527298 | 47527410 |
| chr6 | 47777143 | 47777238 |
| chr6 | 47953247 | 47953437 |
| chr6 | 48121226 | 48121383 |
| chr6 | 48554004 | 48554112 |
| chr6 | 48825132 | 48825206 |
| chr6 | 49028089 | 49028286 |
| chr6 | 49149023 | 49149166 |

|      |          |          |
|------|----------|----------|
| chr6 | 49210671 | 49210750 |
| chr6 | 49236454 | 49236602 |
| chr6 | 49374034 | 49374147 |
| chr6 | 50255074 | 50255149 |
| chr6 | 50358550 | 50358676 |
| chr6 | 50390333 | 50390630 |
| chr6 | 50457733 | 50457880 |
| chr6 | 50596963 | 50597115 |
| chr6 | 50665169 | 50665325 |
| chr6 | 51720703 | 51721000 |
| chr6 | 52640346 | 52640512 |
| chr6 | 52682001 | 52682270 |
| chr6 | 53498123 | 53498200 |
| chr6 | 53509249 | 53509350 |
| chr6 | 53573245 | 53573322 |
| chr6 | 54047433 | 54047561 |
| chr6 | 54473468 | 54473542 |
| chr6 | 55341775 | 55341981 |
| chr6 | 55357702 | 55357828 |
| chr6 | 55377528 | 55377623 |
| chr6 | 56233661 | 56233747 |
| chr6 | 56901912 | 56902097 |
| chr6 | 57535533 | 57535689 |
| chr6 | 59108222 | 59108390 |
| chr6 | 59178074 | 59178308 |
| chr6 | 59412967 | 59413118 |
| chr6 | 59414851 | 59415010 |
| chr6 | 59498861 | 59499041 |
| chr6 | 59556974 | 59557186 |
| chr6 | 66535149 | 66535334 |
| chr6 | 66910520 | 66910853 |
| chr6 | 66984861 | 66984960 |
| chr6 | 67014695 | 67014944 |
| chr6 | 67029421 | 67029543 |
| chr6 | 67037365 | 67037505 |
| chr6 | 70814662 | 70814851 |
| chr6 | 70844199 | 70844442 |
| chr6 | 70872356 | 70872509 |
| chr6 | 71125101 | 71125278 |
| chr6 | 71440744 | 71440837 |
| chr6 | 71492876 | 71493039 |
| chr6 | 71493582 | 71493811 |
| chr6 | 71632931 | 71633080 |
| chr6 | 71823792 | 71823882 |
| chr6 | 71831184 | 71831284 |

|      |          |          |
|------|----------|----------|
| chr6 | 71846981 | 71847074 |
| chr6 | 72216605 | 72216718 |
| chr6 | 72362457 | 72362548 |
| chr6 | 72462730 | 72462869 |
| chr6 | 72547894 | 72548055 |
| chr6 | 72650460 | 72650537 |
| chr6 | 82909361 | 82909434 |
| chr6 | 83057892 | 83058092 |
| chr6 | 83121479 | 83121649 |
| chr6 | 83300856 | 83301049 |
| chr6 | 83312180 | 83312362 |
| chr6 | 83422459 | 83422549 |
| chr6 | 83478830 | 83478965 |
| chr6 | 83831770 | 83832055 |
| chr6 | 85137269 | 85137435 |
| chr6 | 85443623 | 85443775 |
| chr6 | 85451378 | 85451469 |
| chr6 | 86233984 | 86234141 |
| chr6 | 86669348 | 86669512 |
| chr6 | 86733351 | 86733459 |
| chr6 | 86765815 | 86766079 |
| chr6 | 87277608 | 87277788 |
| chr6 | 87294981 | 87295246 |
| chr6 | 87389021 | 87389109 |
| chr6 | 87479455 | 87479533 |
| chr6 | 87672184 | 87672308 |
| chr6 | 87789346 | 87789500 |
| chr6 | 88071432 | 88071559 |
| chr6 | 88842001 | 88842097 |
| chr6 | 88842259 | 88842381 |
| chr6 | 89412700 | 89412816 |
| chr6 | 89644533 | 89644614 |
| chr6 | 91139972 | 91140089 |
| chr6 | 91162420 | 91162639 |
| chr6 | 91459569 | 91459705 |
| chr6 | 91488996 | 91489087 |
| chr6 | 91615196 | 91615427 |
| chr6 | 91736593 | 91736697 |
| chr6 | 92219512 | 92219692 |
| chr6 | 92269096 | 92269274 |
| chr6 | 92316914 | 92317051 |
| chr6 | 94186624 | 94186824 |
| chr6 | 94203830 | 94203939 |
| chr6 | 94390445 | 94390664 |
| chr6 | 94504053 | 94504234 |

|      |           |           |
|------|-----------|-----------|
| chr6 | 94681231  | 94681366  |
| chr6 | 94700282  | 94700460  |
| chr6 | 94813867  | 94813995  |
| chr6 | 94835808  | 94835905  |
| chr6 | 94900894  | 94900977  |
| chr6 | 94901058  | 94901136  |
| chr6 | 94915918  | 94916052  |
| chr6 | 94921830  | 94921984  |
| chr6 | 96587633  | 96587790  |
| chr6 | 97205588  | 97205849  |
| chr6 | 97288516  | 97288887  |
| chr6 | 98849005  | 98849078  |
| chr6 | 99106066  | 99106160  |
| chr6 | 99173432  | 99173575  |
| chr6 | 99662314  | 99662404  |
| chr6 | 99811486  | 99811623  |
| chr6 | 100218664 | 100218827 |
| chr6 | 100879693 | 100879795 |
| chr6 | 101102190 | 101102337 |
| chr6 | 101427475 | 101427615 |
| chr6 | 103314599 | 103314723 |
| chr6 | 103649072 | 103649292 |
| chr6 | 105548161 | 105548236 |
| chr6 | 108148529 | 108148602 |
| chr6 | 108486625 | 108486804 |
| chr6 | 108532606 | 108532771 |
| chr6 | 108660421 | 108660523 |
| chr6 | 108668256 | 108668334 |
| chr6 | 108704391 | 108704708 |
| chr6 | 112210613 | 112210728 |
| chr6 | 112499546 | 112499673 |
| chr6 | 113024683 | 113024811 |
| chr6 | 113024950 | 113025096 |
| chr6 | 113038305 | 113038543 |
| chr6 | 113077223 | 113077298 |
| chr6 | 113099748 | 113099854 |
| chr6 | 113306350 | 113306821 |
| chr6 | 113326732 | 113326878 |
| chr6 | 113668631 | 113668889 |
| chr6 | 113690490 | 113690662 |
| chr6 | 114404416 | 114404498 |
| chr6 | 114901447 | 114901608 |
| chr6 | 115539119 | 115539306 |
| chr6 | 115700948 | 115701097 |
| chr6 | 115940719 | 115940822 |

|      |           |           |
|------|-----------|-----------|
| chr6 | 116287003 | 116287174 |
| chr6 | 116635425 | 116635757 |
| chr6 | 116650461 | 116650556 |
| chr6 | 117891576 | 117891668 |
| chr6 | 117916842 | 117916979 |
| chr6 | 119385487 | 119385625 |
| chr6 | 119396284 | 119396403 |
| chr6 | 120172286 | 120172383 |
| chr6 | 120318641 | 120318812 |
| chr6 | 120376874 | 120376977 |
| chr6 | 120454685 | 120454817 |
| chr6 | 120917716 | 120917820 |
| chr6 | 121138420 | 121138508 |
| chr6 | 121176163 | 121176291 |
| chr6 | 121177026 | 121177310 |
| chr6 | 122308655 | 122308845 |
| chr6 | 122598593 | 122598765 |
| chr6 | 122615941 | 122616031 |
| chr6 | 122625214 | 122625431 |
| chr6 | 122810851 | 122811077 |
| chr6 | 124662813 | 124663010 |
| chr6 | 124686106 | 124686287 |
| chr6 | 124738640 | 124738837 |
| chr6 | 124828944 | 124829118 |
| chr6 | 124829507 | 124829650 |
| chr6 | 125074094 | 125074327 |
| chr6 | 125215203 | 125215528 |
| chr6 | 125413432 | 125413714 |
| chr6 | 125433726 | 125433972 |
| chr6 | 125573320 | 125573419 |
| chr6 | 127269057 | 127269311 |
| chr6 | 127330300 | 127330477 |
| chr6 | 127335480 | 127335602 |
| chr6 | 127335690 | 127335851 |
| chr6 | 128225952 | 128226036 |
| chr6 | 128549626 | 128549743 |
| chr6 | 128597207 | 128597501 |
| chr6 | 129180517 | 129180677 |
| chr6 | 129319467 | 129319558 |
| chr6 | 133105047 | 133105209 |
| chr6 | 133341841 | 133342074 |
| chr6 | 133820483 | 133820561 |
| chr6 | 134111615 | 134111741 |
| chr6 | 134148079 | 134148186 |
| chr6 | 134164434 | 134164591 |

|      |           |           |
|------|-----------|-----------|
| chr6 | 134262818 | 134262897 |
| chr6 | 134263326 | 134263551 |
| chr6 | 134357872 | 134357951 |
| chr6 | 134515582 | 134515725 |
| chr6 | 134614746 | 134615041 |
| chr6 | 134615115 | 134615218 |
| chr6 | 134661075 | 134661337 |
| chr6 | 134700965 | 134701067 |
| chr6 | 134826285 | 134826367 |
| chr6 | 134829979 | 134830088 |
| chr6 | 135026442 | 135026538 |
| chr6 | 135200324 | 135200538 |
| chr6 | 135362696 | 135362814 |
| chr6 | 135544071 | 135544195 |
| chr6 | 136470573 | 136470661 |
| chr6 | 136647699 | 136647793 |
| chr6 | 136811305 | 136811415 |
| chr6 | 136828170 | 136828393 |
| chr6 | 137327880 | 137328045 |
| chr6 | 137433761 | 137433948 |
| chr6 | 137443210 | 137443341 |
| chr6 | 137466484 | 137466647 |
| chr6 | 137471211 | 137471297 |
| chr6 | 137540821 | 137540933 |
| chr6 | 137550255 | 137550414 |
| chr6 | 137569067 | 137569182 |
| chr6 | 137570847 | 137571030 |
| chr6 | 137582471 | 137582656 |
| chr6 | 137612330 | 137612404 |
| chr6 | 137752055 | 137752183 |
| chr6 | 137966241 | 137966400 |
| chr6 | 140280831 | 140281018 |
| chr6 | 140341410 | 140341495 |
| chr6 | 140546746 | 140546877 |
| chr6 | 141640778 | 141640977 |
| chr6 | 143133205 | 143133523 |
| chr6 | 143152401 | 143152520 |
| chr6 | 144056863 | 144056954 |
| chr6 | 145210958 | 145211069 |
| chr6 | 145256104 | 145256292 |
| chr6 | 145679665 | 145679766 |
| chr6 | 145761285 | 145761390 |
| chr6 | 145932772 | 145933009 |
| chr6 | 146642530 | 146642606 |
| chr6 | 146959971 | 146960216 |



|      |           |           |
|------|-----------|-----------|
| chr6 | 147696045 | 147696128 |
| chr6 | 149148577 | 149148792 |
| chr6 | 149586451 | 149586538 |
| chr7 | 3287271   | 3287485   |
| chr7 | 3644681   | 3644819   |
| chr7 | 3644973   | 3645208   |
| chr7 | 3665473   | 3665612   |
| chr7 | 4170266   | 4170451   |
| chr7 | 4464659   | 4464783   |
| chr7 | 4608122   | 4608197   |
| chr7 | 4684951   | 4685289   |
| chr7 | 4739683   | 4739997   |
| chr7 | 4812832   | 4813041   |
| chr7 | 4876887   | 4876984   |
| chr7 | 4943396   | 4943489   |
| chr7 | 5088041   | 5088154   |
| chr7 | 6156225   | 6156315   |
| chr7 | 6169506   | 6169674   |
| chr7 | 6258759   | 6258933   |
| chr7 | 6362541   | 6362687   |
| chr7 | 12922174  | 12922265  |
| chr7 | 16098162  | 16098413  |
| chr7 | 16286266  | 16286387  |
| chr7 | 16364958  | 16365083  |
| chr7 | 16406056  | 16406357  |
| chr7 | 16420645  | 16420780  |
| chr7 | 16452736  | 16452953  |
| chr7 | 16615251  | 16615371  |
| chr7 | 16874982  | 16875292  |
| chr7 | 17017149  | 17017388  |
| chr7 | 17056083  | 17056162  |
| chr7 | 18555640  | 18556019  |
| chr7 | 18910465  | 18910557  |
| chr7 | 19131418  | 19131523  |
| chr7 | 19149306  | 19149422  |
| chr7 | 19228690  | 19228900  |
| chr7 | 19345326  | 19345448  |
| chr7 | 19628612  | 19628698  |
| chr7 | 19715512  | 19715894  |
| chr7 | 19749780  | 19749934  |
| chr7 | 19824751  | 19824904  |
| chr7 | 19841790  | 19842059  |
| chr7 | 19843259  | 19843333  |
| chr7 | 19867909  | 19868224  |
| chr7 | 19950770  | 19950846  |

|      |          |          |
|------|----------|----------|
| chr7 | 19952660 | 19952830 |
| chr7 | 24113154 | 24113293 |
| chr7 | 24459893 | 24460036 |
| chr7 | 24539764 | 24540023 |
| chr7 | 24546927 | 24547076 |
| chr7 | 24884117 | 24884215 |
| chr7 | 25077012 | 25077191 |
| chr7 | 25197618 | 25197917 |
| chr7 | 25267955 | 25268379 |
| chr7 | 25282035 | 25282124 |
| chr7 | 25316584 | 25316680 |
| chr7 | 25411181 | 25411307 |
| chr7 | 25659016 | 25659094 |
| chr7 | 25878825 | 25879005 |
| chr7 | 27178936 | 27179134 |
| chr7 | 27196147 | 27196497 |
| chr7 | 27330860 | 27331032 |
| chr7 | 27361472 | 27361586 |
| chr7 | 27447798 | 27447999 |
| chr7 | 27474706 | 27474819 |
| chr7 | 27481492 | 27481589 |
| chr7 | 27486932 | 27487057 |
| chr7 | 27610536 | 27610676 |
| chr7 | 28372741 | 28372906 |
| chr7 | 28619290 | 28619600 |
| chr7 | 28741845 | 28741962 |
| chr7 | 28803018 | 28803094 |
| chr7 | 28810565 | 28810770 |
| chr7 | 28833806 | 28834102 |
| chr7 | 28925445 | 28925696 |
| chr7 | 28931471 | 28931769 |
| chr7 | 28969958 | 28970174 |
| chr7 | 29180641 | 29180760 |
| chr7 | 29194306 | 29194425 |
| chr7 | 29248421 | 29248554 |
| chr7 | 29254030 | 29254150 |
| chr7 | 29391764 | 29392022 |
| chr7 | 29392761 | 29392966 |
| chr7 | 29418331 | 29418444 |
| chr7 | 29505410 | 29505490 |
| chr7 | 29906206 | 29906295 |
| chr7 | 29989268 | 29989342 |
| chr7 | 30308585 | 30308709 |
| chr7 | 30552334 | 30552519 |
| chr7 | 30650221 | 30650429 |

|      |          |          |
|------|----------|----------|
| chr7 | 30804205 | 30804365 |
| chr7 | 34158147 | 34158248 |
| chr7 | 34290871 | 34290993 |
| chr7 | 34668050 | 34668128 |
| chr7 | 35085064 | 35085143 |
| chr7 | 35333867 | 35333950 |
| chr7 | 35334049 | 35334287 |
| chr7 | 35355540 | 35355710 |
| chr7 | 35362970 | 35363096 |
| chr7 | 35372794 | 35372883 |
| chr7 | 35382999 | 35383138 |
| chr7 | 35557840 | 35558000 |
| chr7 | 35586162 | 35586254 |
| chr7 | 38084962 | 38085074 |
| chr7 | 39544313 | 39544402 |
| chr7 | 40677704 | 40677900 |
| chr7 | 43444011 | 43444094 |
| chr7 | 43579547 | 43579686 |
| chr7 | 43914988 | 43915111 |
| chr7 | 44304994 | 44305288 |
| chr7 | 44305434 | 44305558 |
| chr7 | 44590615 | 44590739 |
| chr7 | 44670856 | 44670931 |
| chr7 | 44683620 | 44683811 |
| chr7 | 44695343 | 44695486 |
| chr7 | 44815883 | 44815957 |
| chr7 | 44854838 | 44854953 |
| chr7 | 44929697 | 44929916 |
| chr7 | 44986581 | 44986921 |
| chr7 | 45017687 | 45017931 |
| chr7 | 45054259 | 45054406 |
| chr7 | 45712563 | 45712885 |
| chr7 | 45727654 | 45727825 |
| chr7 | 45759597 | 45759728 |
| chr7 | 45814388 | 45814564 |
| chr7 | 45896736 | 45896864 |
| chr7 | 45923562 | 45923737 |
| chr7 | 46738720 | 46738805 |
| chr7 | 46833405 | 46833537 |
| chr7 | 48750191 | 48750476 |
| chr7 | 48813713 | 48813888 |
| chr7 | 49351957 | 49352030 |
| chr7 | 49397209 | 49397294 |
| chr7 | 51887654 | 51887819 |
| chr7 | 51893073 | 51893266 |

|      |          |          |
|------|----------|----------|
| chr7 | 52006083 | 52006296 |
| chr7 | 52170199 | 52170478 |
| chr7 | 56049980 | 56050124 |
| chr7 | 61631069 | 61631335 |
| chr7 | 61737580 | 61737737 |
| chr7 | 63559094 | 63559178 |
| chr7 | 63780963 | 63781067 |
| chr7 | 63851964 | 63852067 |
| chr7 | 63957083 | 63957166 |
| chr7 | 65469973 | 65470095 |
| chr7 | 65482241 | 65482406 |
| chr7 | 65802516 | 65802590 |
| chr7 | 65802909 | 65802997 |
| chr7 | 65822686 | 65822791 |
| chr7 | 65822947 | 65823037 |
| chr7 | 65895378 | 65895498 |
| chr7 | 66592042 | 66592145 |
| chr7 | 66689702 | 66689865 |
| chr7 | 67222390 | 67222536 |
| chr7 | 67645312 | 67645388 |
| chr7 | 68691582 | 68691728 |
| chr7 | 68697094 | 68697247 |
| chr7 | 68749345 | 68749571 |
| chr7 | 70300579 | 70300668 |
| chr7 | 70575838 | 70575935 |
| chr7 | 73558695 | 73558791 |
| chr7 | 73588657 | 73588827 |
| chr7 | 73802912 | 73803027 |
| chr7 | 75427440 | 75427573 |
| chr7 | 75480913 | 75481029 |
| chr7 | 75498819 | 75498973 |
| chr7 | 75613457 | 75613619 |
| chr7 | 78895726 | 78895916 |
| chr7 | 79256830 | 79256983 |
| chr7 | 79272499 | 79272621 |
| chr7 | 79272971 | 79273086 |
| chr7 | 79279780 | 79279916 |
| chr7 | 79660146 | 79660228 |
| chr7 | 79888774 | 79888893 |
| chr7 | 79935626 | 79935815 |
| chr7 | 80057096 | 80057282 |
| chr7 | 80160244 | 80160360 |
| chr7 | 80166900 | 80166984 |
| chr7 | 80174000 | 80174095 |
| chr7 | 80231985 | 80232225 |

|      |           |           |
|------|-----------|-----------|
| chr7 | 80324482  | 80324569  |
| chr7 | 80866853  | 80866978  |
| chr7 | 81339966  | 81340126  |
| chr7 | 81571109  | 81571294  |
| chr7 | 81708265  | 81708363  |
| chr7 | 81739106  | 81739188  |
| chr7 | 82664857  | 82664942  |
| chr7 | 82794663  | 82794820  |
| chr7 | 83581143  | 83581222  |
| chr7 | 83626886  | 83627008  |
| chr7 | 83847712  | 83847909  |
| chr7 | 83884967  | 83885165  |
| chr7 | 83891855  | 83892255  |
| chr7 | 84029209  | 84029321  |
| chr7 | 84056056  | 84056234  |
| chr7 | 84117877  | 84117964  |
| chr7 | 84145770  | 84145846  |
| chr7 | 84167199  | 84167288  |
| chr7 | 84689988  | 84690130  |
| chr7 | 89516933  | 89517038  |
| chr7 | 90019742  | 90019877  |
| chr7 | 90426433  | 90426510  |
| chr7 | 90476019  | 90476142  |
| chr7 | 92670049  | 92670187  |
| chr7 | 92741530  | 92741769  |
| chr7 | 95853569  | 95853687  |
| chr7 | 97341615  | 97341691  |
| chr7 | 97830723  | 97830922  |
| chr7 | 98120458  | 98120546  |
| chr7 | 98141370  | 98141569  |
| chr7 | 98383563  | 98383638  |
| chr7 | 98656741  | 98656863  |
| chr7 | 99100719  | 99100893  |
| chr7 | 99141252  | 99141439  |
| chr7 | 99161712  | 99161786  |
| chr7 | 99483680  | 99483754  |
| chr7 | 100126745 | 100126879 |
| chr7 | 100227228 | 100227311 |
| chr7 | 100372033 | 100372207 |
| chr7 | 100495646 | 100495731 |
| chr7 | 100536871 | 100537130 |
| chr7 | 100607301 | 100607515 |
| chr7 | 100984782 | 100984884 |
| chr7 | 101143029 | 101143152 |
| chr7 | 101320957 | 101321096 |

|      |           |           |
|------|-----------|-----------|
| chr7 | 101896605 | 101896790 |
| chr7 | 101905719 | 101905879 |
| chr7 | 101933849 | 101934085 |
| chr7 | 105400270 | 105400446 |
| chr7 | 105650900 | 105650991 |
| chr7 | 108934267 | 108934416 |
| chr7 | 109602612 | 109602954 |
| chr7 | 110061518 | 110061602 |
| chr7 | 110109187 | 110109297 |
| chr7 | 110121755 | 110121831 |
| chr7 | 110288436 | 110288656 |
| chr7 | 110615919 | 110616100 |
| chr7 | 110648796 | 110649066 |
| chr7 | 110785089 | 110785318 |
| chr7 | 110792891 | 110793053 |
| chr7 | 110894002 | 110894199 |
| chr7 | 110894332 | 110894431 |
| chr7 | 110990428 | 110990554 |
| chr7 | 110990725 | 110990892 |
| chr7 | 112180343 | 112180421 |
| chr7 | 112208840 | 112209164 |
| chr7 | 112213310 | 112213444 |
| chr7 | 112225686 | 112225780 |
| chr7 | 112271113 | 112271196 |
| chr7 | 112720139 | 112720329 |
| chr7 | 112788396 | 112788543 |
| chr7 | 112823874 | 112823998 |
| chr7 | 113048532 | 113048629 |
| chr7 | 113122216 | 113122324 |
| chr7 | 113207127 | 113207377 |
| chr7 | 113214874 | 113215039 |
| chr7 | 113253894 | 113254051 |
| chr7 | 113436477 | 113436564 |
| chr7 | 113461194 | 113461270 |
| chr7 | 113730611 | 113730859 |
| chr7 | 113825588 | 113825715 |
| chr7 | 114171816 | 114171941 |
| chr7 | 114199556 | 114199795 |
| chr7 | 114231953 | 114232182 |
| chr7 | 114847350 | 114847441 |
| chr7 | 114873531 | 114873604 |
| chr7 | 115092741 | 115092879 |
| chr7 | 115308503 | 115308600 |
| chr7 | 115794592 | 115794714 |
| chr7 | 115996593 | 115996673 |

|      |           |           |
|------|-----------|-----------|
| chr7 | 116202291 | 116202524 |
| chr7 | 116231266 | 116231413 |
| chr7 | 116456996 | 116457123 |
| chr7 | 117091158 | 117091268 |
| chr7 | 117571789 | 117571862 |
| chr7 | 118243677 | 118244007 |
| chr7 | 118250576 | 118250844 |
| chr7 | 118600028 | 118600211 |
| chr7 | 118611312 | 118611554 |
| chr7 | 118628043 | 118628192 |
| chr7 | 118889042 | 118889160 |
| chr7 | 119762332 | 119762430 |
| chr7 | 119770084 | 119770173 |
| chr7 | 120173717 | 120173811 |
| chr7 | 120189525 | 120189606 |
| chr7 | 122152551 | 122152679 |
| chr7 | 122969750 | 122969861 |
| chr7 | 123108430 | 123108741 |
| chr7 | 123294001 | 123294117 |
| chr7 | 123308046 | 123308119 |
| chr7 | 123377863 | 123378042 |
| chr7 | 123394272 | 123394348 |
| chr7 | 125500141 | 125500245 |
| chr7 | 125552102 | 125552283 |
| chr7 | 126518619 | 126518818 |
| chr7 | 126746929 | 126747100 |
| chr7 | 126799249 | 126799346 |
| chr7 | 126922837 | 126923100 |
| chr7 | 127208907 | 127209204 |
| chr7 | 127260692 | 127260918 |
| chr7 | 127375974 | 127376201 |
| chr7 | 127393707 | 127393798 |
| chr7 | 127449138 | 127449236 |
| chr7 | 127470898 | 127471010 |
| chr7 | 127477709 | 127478115 |
| chr7 | 127573170 | 127573381 |
| chr7 | 127745918 | 127746067 |
| chr7 | 127800562 | 127800680 |
| chr7 | 127841629 | 127841733 |
| chr7 | 127912777 | 127912885 |
| chr7 | 127922859 | 127923005 |
| chr7 | 128032502 | 128032634 |
| chr7 | 128057076 | 128057216 |
| chr7 | 128238480 | 128238634 |
| chr7 | 128611079 | 128611289 |

|      |           |           |
|------|-----------|-----------|
| chr7 | 128910179 | 128910428 |
| chr7 | 128980043 | 128980212 |
| chr7 | 129591852 | 129591957 |
| chr7 | 129664342 | 129664417 |
| chr7 | 129681009 | 129681163 |
| chr7 | 129751137 | 129751247 |
| chr7 | 130335568 | 130335773 |
| chr7 | 130593226 | 130593319 |
| chr7 | 130834512 | 130834596 |
| chr7 | 132814164 | 132814243 |
| chr7 | 133029782 | 133029898 |
| chr7 | 133112679 | 133112848 |
| chr7 | 133470411 | 133470507 |
| chr7 | 135059714 | 135059817 |
| chr7 | 135509263 | 135509516 |
| chr7 | 135528672 | 135528757 |
| chr7 | 137698660 | 137698812 |
| chr7 | 139258180 | 139258278 |
| chr7 | 139382909 | 139383119 |
| chr7 | 139388800 | 139388993 |
| chr7 | 139572906 | 139572995 |
| chr7 | 140036689 | 140036812 |
| chr7 | 140121568 | 140121740 |
| chr7 | 141004360 | 141004473 |
| chr7 | 141037185 | 141037303 |
| chr7 | 141215681 | 141215842 |
| chr7 | 141216371 | 141216559 |
| chr7 | 141276752 | 141277031 |
| chr7 | 142068583 | 142068780 |
| chr7 | 142932003 | 142932108 |
| chr7 | 143122168 | 143122302 |
| chr7 | 143207122 | 143207259 |
| chr7 | 143549159 | 143549371 |
| chr7 | 143800941 | 143801079 |
| chr7 | 143822842 | 143822972 |
| chr7 | 143958283 | 143958456 |
| chr7 | 143986419 | 143986525 |
| chr7 | 144119686 | 144119819 |
| chr7 | 144233571 | 144233729 |
| chr7 | 144747959 | 144748035 |
| chr7 | 144971532 | 144971627 |
| chr7 | 145340929 | 145341417 |
| chr8 | 3215876   | 3215952   |
| chr8 | 3392853   | 3392993   |
| chr8 | 3467675   | 3467761   |



|      |          |          |
|------|----------|----------|
| chr8 | 3754394  | 3754558  |
| chr8 | 4166090  | 4166476  |
| chr8 | 4238681  | 4238794  |
| chr8 | 4252273  | 4252391  |
| chr8 | 6688719  | 6688847  |
| chr8 | 8054403  | 8054539  |
| chr8 | 9935000  | 9935193  |
| chr8 | 10061172 | 10061266 |
| chr8 | 10619904 | 10620064 |
| chr8 | 10664957 | 10665062 |
| chr8 | 10879636 | 10879838 |
| chr8 | 10962067 | 10962177 |
| chr8 | 11156233 | 11156350 |
| chr8 | 11279653 | 11279726 |
| chr8 | 11473143 | 11473269 |
| chr8 | 12098044 | 12098172 |
| chr8 | 12486736 | 12486849 |
| chr8 | 12934645 | 12934762 |
| chr8 | 13060937 | 13061019 |
| chr8 | 13677668 | 13677747 |
| chr8 | 13897596 | 13897717 |
| chr8 | 14996611 | 14996842 |
| chr8 | 15519810 | 15520076 |
| chr8 | 19784569 | 19784659 |
| chr8 | 20294141 | 20294221 |
| chr8 | 22025304 | 22025537 |
| chr8 | 22414395 | 22414566 |
| chr8 | 22744647 | 22744784 |
| chr8 | 22878331 | 22878529 |
| chr8 | 22883830 | 22883942 |
| chr8 | 23095562 | 23095659 |
| chr8 | 23166712 | 23166845 |
| chr8 | 23554168 | 23554301 |
| chr8 | 24430623 | 24430726 |
| chr8 | 24506384 | 24506504 |
| chr8 | 24573287 | 24573401 |
| chr8 | 25017074 | 25017252 |
| chr8 | 25028116 | 25028207 |
| chr8 | 25710694 | 25710825 |
| chr8 | 25750591 | 25750699 |
| chr8 | 26119373 | 26119463 |
| chr8 | 26724758 | 26724833 |
| chr8 | 26976995 | 26977069 |
| chr8 | 27186620 | 27186743 |
| chr8 | 30569856 | 30570166 |

|      |          |          |
|------|----------|----------|
| chr8 | 31149892 | 31149973 |
| chr8 | 31445019 | 31445150 |
| chr8 | 31521189 | 31521323 |
| chr8 | 32989741 | 32989917 |
| chr8 | 33673041 | 33673150 |
| chr8 | 33842298 | 33842391 |
| chr8 | 33993054 | 33993182 |
| chr8 | 34578287 | 34578510 |
| chr8 | 34591455 | 34591651 |
| chr8 | 34622797 | 34622938 |
| chr8 | 35160418 | 35160514 |
| chr8 | 35193906 | 35194152 |
| chr8 | 35352301 | 35352510 |
| chr8 | 35517423 | 35517624 |
| chr8 | 35826632 | 35826839 |
| chr8 | 35971160 | 35971248 |
| chr8 | 35980093 | 35980218 |
| chr8 | 36073334 | 36073536 |
| chr8 | 36137346 | 36137612 |
| chr8 | 36249452 | 36249594 |
| chr8 | 40573404 | 40573674 |
| chr8 | 40634894 | 40634998 |
| chr8 | 40803813 | 40803903 |
| chr8 | 40943550 | 40943836 |
| chr8 | 40983971 | 40984047 |
| chr8 | 40996582 | 40996723 |
| chr8 | 41015802 | 41016017 |
| chr8 | 41120528 | 41120823 |
| chr8 | 41374652 | 41374818 |
| chr8 | 41815422 | 41815558 |
| chr8 | 42187203 | 42187364 |
| chr8 | 44156000 | 44156074 |
| chr8 | 44705005 | 44705145 |
| chr8 | 44801016 | 44801196 |
| chr8 | 45063282 | 45063459 |
| chr8 | 45411137 | 45411229 |
| chr8 | 45607117 | 45607267 |
| chr8 | 45659597 | 45659816 |
| chr8 | 46397346 | 46397450 |
| chr8 | 46477849 | 46477984 |
| chr8 | 46811501 | 46811593 |
| chr8 | 46849113 | 46849227 |
| chr8 | 46888660 | 46888740 |
| chr8 | 46933375 | 46933494 |
| chr8 | 47334212 | 47334426 |

|      |          |          |
|------|----------|----------|
| chr8 | 47533452 | 47533579 |
| chr8 | 47675148 | 47675337 |
| chr8 | 47764123 | 47764342 |
| chr8 | 47779704 | 47779887 |
| chr8 | 47932528 | 47932668 |
| chr8 | 48865542 | 48865772 |
| chr8 | 51409308 | 51409403 |
| chr8 | 55345829 | 55345945 |
| chr8 | 56277922 | 56278119 |
| chr8 | 56278321 | 56278437 |
| chr8 | 56293551 | 56293712 |
| chr8 | 56304759 | 56304914 |
| chr8 | 57490038 | 57490248 |
| chr8 | 57511741 | 57511845 |
| chr8 | 60643679 | 60643788 |
| chr8 | 60729037 | 60729136 |
| chr8 | 60736047 | 60736256 |
| chr8 | 60773524 | 60773641 |
| chr8 | 60965495 | 60965778 |
| chr8 | 61142376 | 61142539 |
| chr8 | 61301848 | 61301943 |
| chr8 | 61397317 | 61397434 |
| chr8 | 61606850 | 61606940 |
| chr8 | 62002310 | 62002485 |
| chr8 | 64733630 | 64733757 |
| chr8 | 68010421 | 68010504 |
| chr8 | 68083148 | 68083248 |
| chr8 | 68121584 | 68121723 |
| chr8 | 68157382 | 68157497 |
| chr8 | 68266573 | 68266740 |
| chr8 | 68793902 | 68793984 |
| chr8 | 69063562 | 69063772 |
| chr8 | 69625569 | 69625730 |
| chr8 | 69716890 | 69717125 |
| chr8 | 69848997 | 69849242 |
| chr8 | 69996363 | 69996472 |
| chr8 | 70072585 | 70072817 |
| chr8 | 70139195 | 70139385 |
| chr8 | 70212323 | 70212538 |
| chr8 | 70212628 | 70212806 |
| chr8 | 70234426 | 70234570 |
| chr8 | 70641916 | 70641993 |
| chr8 | 70754493 | 70754632 |
| chr8 | 70760958 | 70761122 |
| chr8 | 70797135 | 70797362 |

|      |          |          |
|------|----------|----------|
| chr8 | 70839659 | 70839876 |
| chr8 | 71537462 | 71537616 |
| chr8 | 71569956 | 71570145 |
| chr8 | 71570463 | 71570677 |
| chr8 | 71603030 | 71603161 |
| chr8 | 71611065 | 71611141 |
| chr8 | 72161017 | 72161183 |
| chr8 | 72421555 | 72421664 |
| chr8 | 72548411 | 72548493 |
| chr8 | 72571045 | 72571312 |
| chr8 | 73100790 | 73100937 |
| chr8 | 73319650 | 73319742 |
| chr8 | 75549331 | 75549517 |
| chr8 | 76902082 | 76902218 |
| chr8 | 76912808 | 76912919 |
| chr8 | 76913290 | 76913488 |
| chr8 | 77433478 | 77433648 |
| chr8 | 79155993 | 79156069 |
| chr8 | 79208780 | 79208974 |
| chr8 | 79372692 | 79372834 |
| chr8 | 80710999 | 80711114 |
| chr8 | 80843902 | 80844004 |
| chr8 | 83594543 | 83594702 |
| chr8 | 83602870 | 83602978 |
| chr8 | 83607950 | 83608092 |
| chr8 | 83619568 | 83619664 |
| chr8 | 83715122 | 83715260 |
| chr8 | 83756896 | 83756986 |
| chr8 | 83955369 | 83955646 |
| chr8 | 84066618 | 84066750 |
| chr8 | 84089474 | 84089558 |
| chr8 | 84192296 | 84192411 |
| chr8 | 84198538 | 84198691 |
| chr8 | 84270428 | 84270549 |
| chr8 | 84334392 | 84334610 |
| chr8 | 84595915 | 84596005 |
| chr8 | 84656944 | 84657084 |
| chr8 | 84664119 | 84664196 |
| chr8 | 84723012 | 84723164 |
| chr8 | 84846955 | 84847131 |
| chr8 | 84893838 | 84894002 |
| chr8 | 84908539 | 84908621 |
| chr8 | 84980273 | 84980525 |
| chr8 | 84990861 | 84991076 |
| chr8 | 85111870 | 85111954 |

|      |           |           |
|------|-----------|-----------|
| chr8 | 86759049  | 86759251  |
| chr8 | 88443548  | 88443635  |
| chr8 | 88451602  | 88451704  |
| chr8 | 88696818  | 88696980  |
| chr8 | 88792781  | 88792858  |
| chr8 | 88853301  | 88853469  |
| chr8 | 89279963  | 89280087  |
| chr8 | 90379188  | 90379363  |
| chr8 | 90825469  | 90825556  |
| chr8 | 91313276  | 91313452  |
| chr8 | 93283969  | 93284127  |
| chr8 | 93332903  | 93332987  |
| chr8 | 94214375  | 94214477  |
| chr8 | 94363371  | 94363581  |
| chr8 | 94377678  | 94377925  |
| chr8 | 94601823  | 94601919  |
| chr8 | 94686093  | 94686268  |
| chr8 | 94785659  | 94785744  |
| chr8 | 94871622  | 94871796  |
| chr8 | 94954573  | 94954707  |
| chr8 | 94956123  | 94956213  |
| chr8 | 94967076  | 94967198  |
| chr8 | 95080693  | 95081080  |
| chr8 | 95144346  | 95144550  |
| chr8 | 95144764  | 95144846  |
| chr8 | 95202800  | 95202920  |
| chr8 | 95531895  | 95531970  |
| chr8 | 95807676  | 95807766  |
| chr8 | 104472520 | 104472733 |
| chr8 | 104655122 | 104655199 |
| chr8 | 104732050 | 104732125 |
| chr8 | 104846968 | 104847041 |
| chr8 | 104867330 | 104867436 |
| chr8 | 104886704 | 104886825 |
| chr8 | 105000684 | 105000796 |
| chr8 | 105289133 | 105289286 |
| chr8 | 105305425 | 105305534 |
| chr8 | 105332597 | 105332770 |
| chr8 | 105347999 | 105348085 |
| chr8 | 105827204 | 105827322 |
| chr8 | 105860301 | 105860556 |
| chr8 | 106287444 | 106287568 |
| chr8 | 106308407 | 106308542 |
| chr8 | 106338031 | 106338215 |
| chr8 | 106378513 | 106378674 |

|      |           |           |
|------|-----------|-----------|
| chr8 | 106518849 | 106518978 |
| chr8 | 106588877 | 106588987 |
| chr8 | 106603211 | 106603401 |
| chr8 | 106614756 | 106614933 |
| chr8 | 106616113 | 106616188 |
| chr8 | 107002702 | 107002902 |
| chr8 | 107056703 | 107056854 |
| chr8 | 107117078 | 107117250 |
| chr8 | 107286774 | 107286974 |
| chr8 | 107588489 | 107588567 |
| chr8 | 108591391 | 108591502 |
| chr8 | 108724735 | 108724823 |
| chr8 | 108754643 | 108754759 |
| chr8 | 109373951 | 109374049 |
| chr8 | 109374135 | 109374271 |
| chr8 | 109565691 | 109565840 |
| chr8 | 109960603 | 109960677 |
| chr8 | 110525251 | 110525363 |
| chr8 | 111300283 | 111300388 |
| chr8 | 111370581 | 111370672 |
| chr8 | 111642544 | 111642646 |
| chr8 | 111644455 | 111644543 |
| chr8 | 111939862 | 111940088 |
| chr8 | 111940535 | 111940654 |
| chr8 | 113384170 | 113384269 |
| chr8 | 113523709 | 113523794 |
| chr8 | 113635222 | 113635529 |
| chr8 | 114131018 | 114131135 |
| chr8 | 114133528 | 114133677 |
| chr8 | 115904028 | 115904259 |
| chr8 | 116229669 | 116229751 |
| chr8 | 116275185 | 116275269 |
| chr8 | 116993535 | 116993651 |
| chr8 | 117280577 | 117280817 |
| chr8 | 117327460 | 117327819 |
| chr8 | 117334204 | 117334356 |
| chr8 | 117645666 | 117645776 |
| chr8 | 117695767 | 117695843 |
| chr8 | 117742570 | 117742644 |
| chr8 | 117764523 | 117764745 |
| chr8 | 118376971 | 118377133 |
| chr8 | 118394098 | 118394524 |
| chr8 | 119400277 | 119400351 |
| chr8 | 119440474 | 119440605 |
| chr8 | 119670518 | 119670628 |

|      |           |           |
|------|-----------|-----------|
| chr8 | 119778371 | 119778510 |
| chr8 | 119813091 | 119813194 |
| chr8 | 119885637 | 119885909 |
| chr8 | 120096620 | 120096732 |
| chr8 | 120366957 | 120367085 |
| chr8 | 120589143 | 120589344 |
| chr8 | 120728905 | 120729035 |
| chr8 | 121164396 | 121164502 |
| chr8 | 121653019 | 121653102 |
| chr8 | 121898516 | 121898664 |
| chr8 | 122294400 | 122294549 |
| chr8 | 122443395 | 122443480 |
| chr8 | 122585761 | 122585848 |
| chr8 | 122635902 | 122636231 |
| chr8 | 122906473 | 122906586 |
| chr8 | 123042492 | 123042600 |
| chr8 | 123051517 | 123051703 |
| chr8 | 123753306 | 123753412 |
| chr8 | 124434520 | 124434623 |
| chr8 | 124754249 | 124754329 |
| chr8 | 124810912 | 124811072 |
| chr8 | 125910071 | 125910350 |
| chr8 | 126000133 | 126000228 |
| chr8 | 126007681 | 126007863 |
| chr8 | 126011076 | 126011160 |
| chr8 | 126094136 | 126094225 |
| chr8 | 126539814 | 126539969 |
| chr8 | 126573942 | 126574193 |
| chr8 | 126594350 | 126594482 |
| chr8 | 126594602 | 126594711 |
| chr8 | 126614025 | 126614390 |
| chr8 | 126615861 | 126616029 |
| chr8 | 126723626 | 126723717 |
| chr8 | 126736926 | 126737003 |
| chr8 | 126770531 | 126770705 |
| chr8 | 126824764 | 126824872 |
| chr8 | 126826340 | 126826623 |
| chr8 | 126829618 | 126829845 |
| chr8 | 126844707 | 126844931 |
| chr8 | 126903265 | 126903499 |
| chr8 | 126924035 | 126924148 |
| chr8 | 126945973 | 126946088 |
| chr8 | 127184062 | 127184264 |
| chr8 | 127440814 | 127441009 |
| chr8 | 127441148 | 127441306 |

|      |           |           |
|------|-----------|-----------|
| chr8 | 129301117 | 129301213 |
| chr9 | 3000014   | 3000159   |
| chr9 | 3000280   | 3000638   |
| chr9 | 3000901   | 3001040   |
| chr9 | 3001142   | 3001524   |
| chr9 | 3002047   | 3002332   |
| chr9 | 3002710   | 3002807   |
| chr9 | 3003336   | 3003500   |
| chr9 | 3004158   | 3004246   |
| chr9 | 3004558   | 3004752   |
| chr9 | 3006398   | 3006501   |
| chr9 | 3006712   | 3006890   |
| chr9 | 3007120   | 3007318   |
| chr9 | 3007565   | 3007664   |
| chr9 | 3009304   | 3009641   |
| chr9 | 3009747   | 3009847   |
| chr9 | 3009982   | 3010085   |
| chr9 | 3012232   | 3012389   |
| chr9 | 3012755   | 3013095   |
| chr9 | 3013202   | 3013308   |
| chr9 | 3013436   | 3013538   |
| chr9 | 3014059   | 3014347   |
| chr9 | 3015298   | 3015453   |
| chr9 | 3017063   | 3017204   |
| chr9 | 3017938   | 3018079   |
| chr9 | 3018317   | 3018683   |
| chr9 | 3019890   | 3019983   |
| chr9 | 3020189   | 3020318   |
| chr9 | 3020459   | 3020559   |
| chr9 | 3020842   | 3021127   |
| chr9 | 3022083   | 3022228   |
| chr9 | 3022472   | 3022591   |
| chr9 | 3023495   | 3023707   |
| chr9 | 3023851   | 3023936   |
| chr9 | 3024076   | 3024213   |
| chr9 | 3024408   | 3024637   |
| chr9 | 3025018   | 3025145   |
| chr9 | 3025487   | 3025613   |
| chr9 | 3025690   | 3025812   |
| chr9 | 3027110   | 3027256   |
| chr9 | 3028069   | 3028151   |
| chr9 | 3028515   | 3028660   |
| chr9 | 3028993   | 3029071   |
| chr9 | 3029691   | 3029853   |
| chr9 | 3030584   | 3030688   |



|      |          |          |
|------|----------|----------|
| chr9 | 3030822  | 3030900  |
| chr9 | 3031225  | 3031318  |
| chr9 | 3031671  | 3031818  |
| chr9 | 3032106  | 3032204  |
| chr9 | 3032407  | 3032676  |
| chr9 | 3032849  | 3032950  |
| chr9 | 3034374  | 3034510  |
| chr9 | 3034613  | 3034698  |
| chr9 | 3034853  | 3035238  |
| chr9 | 3035366  | 3035449  |
| chr9 | 3036005  | 3036107  |
| chr9 | 3036241  | 3036337  |
| chr9 | 3037186  | 3037262  |
| chr9 | 3037367  | 3037447  |
| chr9 | 3037881  | 3038255  |
| chr9 | 3258815  | 3258922  |
| chr9 | 4317691  | 4317768  |
| chr9 | 4376431  | 4376517  |
| chr9 | 5332494  | 5332606  |
| chr9 | 7837192  | 7837406  |
| chr9 | 10815041 | 10815118 |
| chr9 | 13105487 | 13105640 |
| chr9 | 13442437 | 13442545 |
| chr9 | 13681783 | 13681948 |
| chr9 | 13827518 | 13827634 |
| chr9 | 14192898 | 14192975 |
| chr9 | 14215543 | 14215691 |
| chr9 | 14276030 | 14276165 |
| chr9 | 14754075 | 14754181 |
| chr9 | 15238291 | 15238411 |
| chr9 | 15301620 | 15301749 |
| chr9 | 17675621 | 17675856 |
| chr9 | 18412512 | 18412594 |
| chr9 | 20651798 | 20652033 |
| chr9 | 20804421 | 20804512 |
| chr9 | 21092111 | 21092191 |
| chr9 | 21131246 | 21131410 |
| chr9 | 21291280 | 21291443 |
| chr9 | 21835440 | 21835534 |
| chr9 | 21927413 | 21927563 |
| chr9 | 21936822 | 21936974 |
| chr9 | 21955543 | 21955680 |
| chr9 | 22085466 | 22085588 |
| chr9 | 24341400 | 24341651 |
| chr9 | 24542015 | 24542162 |

|      |          |          |
|------|----------|----------|
| chr9 | 26518809 | 26519139 |
| chr9 | 26999570 | 26999673 |
| chr9 | 30794830 | 30794924 |
| chr9 | 31302078 | 31302215 |
| chr9 | 31437994 | 31438161 |
| chr9 | 31449243 | 31449551 |
| chr9 | 31539002 | 31539078 |
| chr9 | 31654208 | 31654398 |
| chr9 | 31706058 | 31706183 |
| chr9 | 31851874 | 31852034 |
| chr9 | 31869222 | 31869299 |
| chr9 | 32011580 | 32011673 |
| chr9 | 32223943 | 32224159 |
| chr9 | 32356255 | 32356352 |
| chr9 | 32901737 | 32901831 |
| chr9 | 34280036 | 34280117 |
| chr9 | 35110694 | 35110802 |
| chr9 | 35305220 | 35305590 |
| chr9 | 35318811 | 35318942 |
| chr9 | 35405115 | 35405190 |
| chr9 | 35412632 | 35412786 |
| chr9 | 36767716 | 36767887 |
| chr9 | 37208142 | 37208309 |
| chr9 | 40776625 | 40776703 |
| chr9 | 41207545 | 41207726 |
| chr9 | 42227970 | 42228045 |
| chr9 | 42457589 | 42457794 |
| chr9 | 42487067 | 42487232 |
| chr9 | 42512477 | 42512573 |
| chr9 | 43461300 | 43461487 |
| chr9 | 43981539 | 43981658 |
| chr9 | 44396794 | 44397055 |
| chr9 | 44515392 | 44515521 |
| chr9 | 44540189 | 44540282 |
| chr9 | 44691985 | 44692060 |
| chr9 | 44799809 | 44799961 |
| chr9 | 45042504 | 45042597 |
| chr9 | 45202176 | 45202277 |
| chr9 | 45204129 | 45204239 |
| chr9 | 45362061 | 45362239 |
| chr9 | 45444540 | 45444636 |
| chr9 | 46469640 | 46469797 |
| chr9 | 47254324 | 47254466 |
| chr9 | 47321232 | 47321368 |
| chr9 | 47589979 | 47590056 |

|      |          |          |
|------|----------|----------|
| chr9 | 47674880 | 47674996 |
| chr9 | 48981940 | 48982139 |
| chr9 | 50701040 | 50701152 |
| chr9 | 51312689 | 51312800 |
| chr9 | 52149457 | 52149583 |
| chr9 | 53356647 | 53356810 |
| chr9 | 53536835 | 53536979 |
| chr9 | 55236389 | 55236505 |
| chr9 | 55512165 | 55512251 |
| chr9 | 56041760 | 56041840 |
| chr9 | 56223613 | 56223745 |
| chr9 | 56223819 | 56223955 |
| chr9 | 56370901 | 56371033 |
| chr9 | 57073494 | 57073580 |
| chr9 | 57075951 | 57076115 |
| chr9 | 57561172 | 57561309 |
| chr9 | 57648064 | 57648193 |
| chr9 | 57723365 | 57723504 |
| chr9 | 57831537 | 57831718 |
| chr9 | 58454887 | 58455096 |
| chr9 | 58541976 | 58542161 |
| chr9 | 58627440 | 58627513 |
| chr9 | 58706331 | 58706528 |
| chr9 | 59143744 | 59143864 |
| chr9 | 59271758 | 59271914 |
| chr9 | 59551604 | 59551765 |
| chr9 | 59641396 | 59641542 |
| chr9 | 59691941 | 59692041 |
| chr9 | 60152214 | 60152336 |
| chr9 | 60545424 | 60545593 |
| chr9 | 60929777 | 60929915 |
| chr9 | 61351098 | 61351465 |
| chr9 | 61808665 | 61808808 |
| chr9 | 62122856 | 62123018 |
| chr9 | 62222707 | 62222832 |
| chr9 | 62858007 | 62858127 |
| chr9 | 63063649 | 63063772 |
| chr9 | 64124974 | 64125051 |
| chr9 | 64199048 | 64199154 |
| chr9 | 64225910 | 64226045 |
| chr9 | 64914084 | 64914166 |
| chr9 | 64934365 | 64934523 |
| chr9 | 65195834 | 65195947 |
| chr9 | 65196274 | 65196491 |
| chr9 | 65215905 | 65216111 |

|      |          |          |
|------|----------|----------|
| chr9 | 66060045 | 66060119 |
| chr9 | 66091491 | 66091564 |
| chr9 | 66266625 | 66266783 |
| chr9 | 66769383 | 66769670 |
| chr9 | 66795498 | 66795622 |
| chr9 | 66795873 | 66796011 |
| chr9 | 66834804 | 66834883 |
| chr9 | 67011749 | 67011845 |
| chr9 | 67040912 | 67041079 |
| chr9 | 67043912 | 67044066 |
| chr9 | 67496489 | 67496600 |
| chr9 | 69442491 | 69442697 |
| chr9 | 69467483 | 69467843 |
| chr9 | 70229943 | 70230218 |
| chr9 | 70269508 | 70269629 |
| chr9 | 70277599 | 70277971 |
| chr9 | 70834777 | 70834992 |
| chr9 | 70855147 | 70855228 |
| chr9 | 70863414 | 70863608 |
| chr9 | 70889138 | 70889288 |
| chr9 | 70987524 | 70987609 |
| chr9 | 71542515 | 71542620 |
| chr9 | 72260427 | 72260566 |
| chr9 | 72530947 | 72531069 |
| chr9 | 73068459 | 73068662 |
| chr9 | 73068842 | 73069036 |
| chr9 | 73320100 | 73320243 |
| chr9 | 74365974 | 74366053 |
| chr9 | 74556423 | 74556581 |
| chr9 | 75237104 | 75237200 |
| chr9 | 75267272 | 75267433 |
| chr9 | 75955185 | 75955292 |
| chr9 | 76523178 | 76523264 |
| chr9 | 77431018 | 77431158 |
| chr9 | 77546123 | 77546290 |
| chr9 | 77612477 | 77612703 |
| chr9 | 77704294 | 77704446 |
| chr9 | 77722543 | 77722690 |
| chr9 | 77746339 | 77746573 |
| chr9 | 78022411 | 78022658 |
| chr9 | 78117747 | 78117981 |
| chr9 | 78177081 | 78177233 |
| chr9 | 78217184 | 78217348 |
| chr9 | 78257044 | 78257155 |
| chr9 | 78289706 | 78289895 |

|      |           |           |
|------|-----------|-----------|
| chr9 | 80176917  | 80177046  |
| chr9 | 81225102  | 81225198  |
| chr9 | 83197105  | 83197227  |
| chr9 | 83241273  | 83241421  |
| chr9 | 85334987  | 85335063  |
| chr9 | 85377025  | 85377170  |
| chr9 | 85490541  | 85490616  |
| chr9 | 86638853  | 86639049  |
| chr9 | 88260277  | 88260364  |
| chr9 | 88438946  | 88439069  |
| chr9 | 88712480  | 88712777  |
| chr9 | 89218173  | 89218454  |
| chr9 | 90036397  | 90036645  |
| chr9 | 92250096  | 92250271  |
| chr9 | 95425931  | 95426029  |
| chr9 | 95795161  | 95795409  |
| chr9 | 95815832  | 95815970  |
| chr9 | 95845837  | 95846082  |
| chr9 | 96416064  | 96416231  |
| chr9 | 96592991  | 96593151  |
| chr9 | 96636002  | 96636082  |
| chr9 | 96650080  | 96650233  |
| chr9 | 96755800  | 96755897  |
| chr9 | 96842141  | 96842357  |
| chr9 | 96923686  | 96923776  |
| chr9 | 97640324  | 97640444  |
| chr9 | 98433092  | 98433291  |
| chr9 | 99243287  | 99243404  |
| chr9 | 99390326  | 99390464  |
| chr9 | 100546183 | 100546262 |
| chr9 | 101034507 | 101034581 |
| chr9 | 102502459 | 102502594 |
| chr9 | 102650027 | 102650263 |
| chr9 | 102734145 | 102734317 |
| chr9 | 102771671 | 102771744 |
| chr9 | 102988555 | 102988711 |
| chr9 | 102996424 | 102996504 |
| chr9 | 103090171 | 103090399 |
| chr9 | 103365954 | 103366062 |
| chr9 | 103507347 | 103507502 |
| chr9 | 104002461 | 104002604 |
| chr9 | 104263074 | 104263194 |
| chr9 | 104269582 | 104269672 |
| chr9 | 104874262 | 104874408 |
| chr9 | 104901211 | 104901487 |

|      |           |           |
|------|-----------|-----------|
| chr9 | 106438254 | 106438456 |
| chr9 | 106447534 | 106447687 |
| chr9 | 106477066 | 106477226 |
| chr9 | 106892040 | 106892237 |
| chr9 | 107296533 | 107296666 |
| chr9 | 107575648 | 107575841 |
| chr9 | 107587473 | 107587647 |
| chr9 | 107619149 | 107619338 |
| chr9 | 107635454 | 107635635 |
| chr9 | 107674737 | 107674812 |
| chr9 | 108002469 | 108002604 |
| chr9 | 108049087 | 108049182 |
| chr9 | 108119961 | 108120039 |
| chr9 | 108144657 | 108144872 |
| chr9 | 108201358 | 108201431 |
| chr9 | 108290353 | 108290446 |
| chr9 | 108301918 | 108302126 |
| chr9 | 108342607 | 108342686 |
| chr9 | 108507801 | 108508056 |
| chr9 | 108843110 | 108843263 |
| chr9 | 108925872 | 108926015 |
| chr9 | 108991613 | 108991895 |
| chr9 | 109879302 | 109879558 |
| chr9 | 109895662 | 109895867 |
| chr9 | 109896738 | 109896960 |
| chr9 | 109931680 | 109931835 |
| chr9 | 110281241 | 110281371 |
| chr9 | 110654110 | 110654240 |
| chr9 | 110781447 | 110781541 |
| chr9 | 110821608 | 110821687 |
| chr9 | 110880866 | 110881027 |
| chr9 | 110890114 | 110890269 |
| chr9 | 111271649 | 111271881 |
| chr9 | 114688624 | 114688699 |
| chr9 | 115350831 | 115350919 |
| chr9 | 115365409 | 115365605 |
| chr9 | 116187407 | 116187695 |
| chr9 | 116223498 | 116223581 |
| chr9 | 116383520 | 116383670 |
| chr9 | 116388958 | 116389128 |
| chr9 | 117016728 | 117017065 |
| chr9 | 117018854 | 117019087 |
| chr9 | 117134196 | 117134273 |
| chr9 | 117378127 | 117378348 |
| chr9 | 117388295 | 117388404 |

|      |           |           |
|------|-----------|-----------|
| chr9 | 117571296 | 117571431 |
| chr9 | 117962182 | 117962319 |
| chr9 | 118638911 | 118639132 |
| chr9 | 119165657 | 119165769 |
| chr9 | 119341224 | 119341435 |
| chr9 | 120577241 | 120577365 |
| chr9 | 120771002 | 120771245 |
| chr9 | 120776438 | 120776867 |
| chr9 | 120893625 | 120893749 |
| chr9 | 120894125 | 120894247 |
| chr9 | 120901042 | 120901146 |
| chr9 | 121710248 | 121710322 |
| chr9 | 121916248 | 121916471 |
| chr9 | 122100734 | 122100960 |
| chr9 | 123111722 | 123111827 |
| chr9 | 123123741 | 123123865 |
| chr9 | 123461802 | 123462189 |
| chr9 | 123826847 | 123826953 |
| chr9 | 123924470 | 123924579 |
| chr9 | 124256395 | 124256475 |
| chr9 | 124256697 | 124256858 |
| chr9 | 124257576 | 124257769 |
| chrX | 7648958   | 7649115   |
| chrX | 7740224   | 7740306   |
| chrX | 7762527   | 7762741   |
| chrX | 7883924   | 7884004   |
| chrX | 8238968   | 8239042   |
| chrX | 9222743   | 9222877   |
| chrX | 9222962   | 9223074   |
| chrX | 9767194   | 9767289   |
| chrX | 11086339  | 11086519  |
| chrX | 13244750  | 13244837  |
| chrX | 13463138  | 13463307  |
| chrX | 13716929  | 13717035  |
| chrX | 20364375  | 20364529  |
| chrX | 20425595  | 20425705  |
| chrX | 20687756  | 20687886  |
| chrX | 20848305  | 20848405  |
| chrX | 36390604  | 36390695  |
| chrX | 38431133  | 38431313  |
| chrX | 48144053  | 48144261  |
| chrX | 48207829  | 48207904  |
| chrX | 48418510  | 48418736  |
| chrX | 49288238  | 49288327  |
| chrX | 51058861  | 51059018  |

|      |           |           |
|------|-----------|-----------|
| chrX | 51706133  | 51706210  |
| chrX | 52988635  | 52988770  |
| chrX | 56769959  | 56770138  |
| chrX | 57935876  | 57936022  |
| chrX | 72918345  | 72918566  |
| chrX | 73459107  | 73459255  |
| chrX | 73914970  | 73915158  |
| chrX | 75095897  | 75095975  |
| chrX | 75152448  | 75152569  |
| chrX | 75416550  | 75416636  |
| chrX | 76598849  | 76599129  |
| chrX | 96455117  | 96455316  |
| chrX | 99141100  | 99141179  |
| chrX | 102119250 | 102119340 |
| chrX | 103546850 | 103547149 |
| chrX | 103556668 | 103556833 |
| chrX | 105684535 | 105684679 |
| chrX | 106186832 | 106186979 |
| chrX | 107169232 | 107169385 |
| chrX | 112370938 | 112371033 |
| chrX | 129056570 | 129056657 |
| chrX | 136741385 | 136741627 |
| chrX | 139730622 | 139730834 |
| chrX | 142516531 | 142516626 |
| chrX | 142577585 | 142577732 |
| chrX | 142902782 | 142902855 |
| chrX | 143483002 | 143483113 |
| chrX | 144114878 | 144115070 |
| chrX | 160546058 | 160546189 |
| chrX | 162829475 | 162829551 |
| chrX | 162931585 | 162931685 |
| chrX | 164233526 | 164233639 |
| chrX | 164419570 | 164419767 |
| chrX | 168902128 | 168902332 |
| chrX | 169210119 | 169210292 |
| chrX | 169320572 | 169320646 |
| chrX | 170004465 | 170004585 |
| chrX | 170673291 | 170673397 |
| chrX | 170758244 | 170758490 |
| chrX | 170880992 | 170881267 |
| chrY | 140592    | 140696    |
| chrY | 142862    | 142947    |
| chrY | 145826    | 145907    |
| chrY | 259097    | 259253    |
| chrY | 261362    | 261436    |



|      |          |          |  |
|------|----------|----------|--|
| chrY | 4036622  | 4036723  |  |
| chrY | 9614160  | 9614238  |  |
| chrY | 11858078 | 11858337 |  |
| chrY | 12752763 | 12752850 |  |
| chrY | 17465411 | 17465487 |  |

**Table S4. Sequencing and quality parameters for ATAC-seq on intestinal and gastric Lgr5+ stem cells and for H3K27ac CHIP-seq on gastric antral epithelium**

|                                         | <b>Gastric antrum H3K27Ac CHIP-seq</b>     |             |
|-----------------------------------------|--------------------------------------------|-------------|
|                                         | Replicate 1                                | Replicate 2 |
| Total reads                             | 56,073,649                                 | 46,095,088  |
| MAPQ score > 30                         | 54,517,407                                 | 44,694,576  |
| Fraction of reads in peaks (FRiP) score | 0.14                                       | 0.17        |
| Non redundant fraction (NRF)            | 0.90                                       | 0.90        |
| PCR Bottlenecking coefficient (PBC) 1   | 0.90                                       | 0.90        |
| PCR Bottlenecking coefficient (PBC) 2   | 9.49                                       | 10.38       |
|                                         |                                            |             |
|                                         | <b>Gastric LGR5+ Stem Cell ATAC-seq</b>    |             |
|                                         | Replicate 1                                | Replicate 2 |
| Total reads                             | 6,557,827                                  | 7,437,887   |
| MAPQ score > 30                         | 6,295,518                                  | 7,167,308   |
| Fraction of reads in peaks (FRiP) score | 0.18                                       | 0.17        |
| Non redundant fraction (NRF)            | 0.69                                       | 0.72        |
| PCR Bottlenecking coefficient (PBC) 1   | 0.68                                       | 0.72        |
| PCR Bottlenecking coefficient (PBC) 2   | 3.14                                       | 3.63        |
|                                         |                                            |             |
|                                         | <b>Intestinal LGR5+ stem cell ATAC-seq</b> |             |
|                                         | Replicate 1                                | Replicate 2 |
| Total reads                             | 24,931,871                                 | 33,685,151  |
| MAPQ score > 30                         | 24,540,451                                 | 33,268,909  |
| Fraction of reads in peaks (FRiP) score | 0.38                                       | 0.14        |
| Non redundant fraction (NRF)            | 0.75                                       | 0.83        |
| PCR Bottlenecking coefficient (PBC) 1   | 0.80                                       | 0.85        |
| PCR Bottlenecking coefficient (PBC) 2   | 5.81                                       | 6.84        |

**Suppl. Table S5. Genes downregulated in HNF4A-overexpressing  $\Delta$ enh stomach organoids**

| Homozygous enhancer deletion vs. wild type enhancer |              |          |          | Heterozygous enhancer deletion vs. wild type enhancer |          |          |         |
|-----------------------------------------------------|--------------|----------|----------|-------------------------------------------------------|----------|----------|---------|
| Eif2s3y                                             | Lgals2       | Mep1b    | Aoc1     | Uty                                                   | Gcnt3    | Sdcbp2   | Ubash3b |
| Ddx3y                                               | Gcnt3        | H2-Q2    | Gm3336   | Eif2s3y                                               | Gm3776   | Phgr1    | Dll4    |
| Uty                                                 | Krt79        | Trim40   | Btc      | Kdm5d                                                 | Krt85    | Cdhr5    | Heph    |
| Akp3                                                | Cdh17        | Ms4a10   | Col18a1  | Ddx3y                                                 | Abcb1a   | Tm4sf5   | Phlda2  |
| Kdm5d                                               | LOC102631757 | Dmkn     | Ripk3    | Gkn2                                                  | Mall     | Pax8     | Abcc3   |
| Alpi                                                | Vipr1        | S100a14  | Jag1     | Akp3                                                  | Nid1     | Bmp8b    |         |
| Gkn2                                                | Pcsk5        | Ceacam18 | Psapl1   | Ms4a18                                                | Gsta1    | Oasl1    |         |
| Cdx2                                                | Clca4        | Gkn1     | My17     | Dpcr1                                                 | Naip1    | Hs3st1   |         |
| Trim29                                              | Trim31       | Clrn3    | Sema4b   | Alpi                                                  | B4galnt4 | H2-Q2    |         |
| Ms4a18                                              | Aldob        | Bmp8b    | Tctex1d4 | Ivl                                                   | Cdh17    | Aim1l    |         |
| Uts2                                                | Prl2c2       | Tm4sf5   | Abhd11os | Uts2                                                  | Tnni2    | Kcnk5    |         |
| Tff3                                                | Rptn         | Prss22   | Mgat5    | Tff3                                                  | Fst      | Cds1     |         |
| Mgat4c                                              | Nlrp9b       | Abhd3    | Spink4   | Prl2c2                                                | B4galnt2 | Entpd8   |         |
| Aldh1a3                                             | Nid1         | Hs3st1   | Dock8    | Clca3                                                 | Slc5a1   | Strc     |         |
| Ugt1a7c                                             | Mall         | Slc17a4  | Slc4a11  | Tmem236                                               | Ereg     | Cdhr2    |         |
| Dpcr1                                               | Gucy2c       | Plac8    | Gprc5a   | Tff1                                                  | Btnl6    | Stc2     |         |
| Clca3                                               | Il1rn        | Entpd8   | Pde5a    | Fcgbp                                                 | Gm3336   | Hpcal4   |         |
| Fcgbp                                               | Angptl4      | Btnl4    | Flnb     | Krt20                                                 | Ecm1     | Paqr5    |         |
| Pbp2                                                | Fst          | Krt4     | Ly6a     | LOC102631757                                          | Tchh     | Gprc5a   |         |
| Myo7b                                               | Slc6a7       | Atp2a3   | Cidea    | Zg16                                                  | Mslnl    | Epas1    |         |
| Tff1                                                | Cyp2c65      | Sh3kbp1  | Cidec    | Ugt1a7c                                               | F3       | Paqr8    |         |
| Ereg                                                | F3           | Kcnj11   | Plau     | Ceacam18                                              | Slc17a4  | Pscs     |         |
| Heph                                                | Slc2a6       | Rhof     | Phgr1    | Krt4                                                  | Lgals2   | Prkcg    |         |
| B4galnt2                                            | Gsta1        | Btnl6    | Arhgap40 | Trim31                                                | Dmkn     | Fam101b  |         |
| Lypd8                                               | Abcb1a       | Gsta2    | Ptgs2    | Gml                                                   | Krt79    | Tsku     |         |
| B4galnt4                                            | Gml          | Sdcbp2   | Sema4g   | Lypd8                                                 | Cidec    | Slc30a10 |         |
| Naip1                                               | Hpcal4       | Efnb2    | Mapk11   | Aldh1a3                                               | Cdx2     | Plac8    |         |
| Ivl                                                 | Adh6a        | Aim1l    | Plat     | Prap1                                                 | Pcsk5    | Hemt1    |         |
| Muc13                                               | Smoc1        | Tmem40   | Pear1    | Areg                                                  | Spr1a    | Trim40   |         |
| Ush1c                                               | Cps1         | Cyp4f14  | Plgrkt   | Pbp2                                                  | Ildr1    | Kcnj11   |         |
| Krt20                                               | Ly6d         | Spr1a    | Car12    | Tcf23                                                 | Atp2a3   | Cidea    |         |
| Tcf23                                               | Oasl1        | Hemt1    | Sema3e   | Slc2a6                                                | Sptssb   | Sema4b   |         |
| Prap1                                               | Gm3776       | Ildr1    | Ceacam1  | Il1rn                                                 | Unc5c    | Krt19    |         |
| Areg                                                | Ecm1         | Sema7a   | Tmem106a | Gkn1                                                  | Muc13    | Cyp2s1   |         |
| Slc26a3                                             | Fabp2        | Epas1    | Fhdc1    | Ly6d                                                  | Abhd3    | Sh2d5    |         |
| Abcc8                                               | Cers4        | Tspan12  | Dhrs11   | Il5ra                                                 | Rhof     | Dhrs11   |         |
| Cdx1                                                | Dok2         | Plk3     | Tsku     | Slc26a3                                               | Mep1b    | Psapl1   |         |
| Slc5a1                                              | S100a7a      | Cwh43    | Cds1     | Cyp2c65                                               | Cyp2d34  | S100g    |         |
| Cdhr5                                               | Sh2d5        | Fam101b  |          |                                                       |          |          |         |

Suppl. Table S6. Primers and sgRNA sequences to generate and genotype Cdx2 3' enhancer deletion mice

|                                              |                                                                                           |
|----------------------------------------------|-------------------------------------------------------------------------------------------|
| <b>sgRNA target sites</b>                    |                                                                                           |
| sgRNA Cdx2_1                                 | ATCTCCCGCAGTCTGAACTT                                                                      |
| sgRNA Cdx2_2                                 | GGATGGTTGGGGGTCGCTAA                                                                      |
| <b>In vitro transcribed oligonucleotides</b> |                                                                                           |
| For sgRNA_Cdx2_1                             | GAAATTAATACGACTCACTATAGGATCTCCCGCAGTCTGAACTTGTGTTTATAGAGCTAGAAATAGCAAGTTAAAATAAGGCTAGTCCG |
| For sgRNA_Cdx2_2                             | GAAATTAATACGACTCACTATAGGGGATGGTTGGGGGTCGCTAAGTTTATAGAGCTAGAAATAGCAAGTTAAAATAAGGCTAGTCCG   |
| DS_IVT_reverse                               | AAAAAAGCACCGACTCGGTGCCACTTTTTCAAGTTGATAACGGACTAGCCTTATTTTAACTTGC                          |
| <b>Genotyping primers</b>                    |                                                                                           |
| Cdx2e_F                                      | ACGGTACAAAGGGGCTCTTT                                                                      |
| Cdx2e_WT_Reverse                             | CTGGGAAGAGCTGGGGATTG                                                                      |
| Cdx2e_Del_Reverse                            | TAGACGTGTAGGGGTGGAGG                                                                      |
